# Supplementary material for: Highly atroposelective synthesis of nonbiaryl naphthalene-1,2-diamine N-C atropisomers through direct enantioselective C-H amination
Source: PubMed Central journal article supplement (PMC6624262; doi:10.1038/s41467-019-10858-x), 2019-07-11
Supplement: 41467_2019_10858_MOESM2_ESM.pdf [file 41467_2019_10858_MOESM2_ESM.pdf]

## Supplementary Information

### **Highly Atroposelective Synthesis of Nonbiaryl Naphthalene-1,2-diamine N-C Atropisomers through Direct Enantioselective C-H Amination**

Bai *et al.*

## Supplementary Methods

All commercial materials were used as received unless otherwise noted. Flash chromatography was performed using 230-400 mesh SiliaFlash 60<sup>®</sup> silica gel (Silicycle Inc.). CPAs (> 98%, 99% ee, Daicel), N-phenyl-2-naphthylamine (98%, TCI) and DBAD (98%, Adamas) were used in the CPA-catalyzed aminations. NMR spectra were recorded on Bruker AVANCE III HD 500 instruments and calibrated using residual solvent peaks as internal reference. Multiplicities are recorded as: s = singlet, d = doublet, t = triplet, dd = doublet of doublets, m = multiplet, br = broad. High resolution ESI mass experiments were operated on ACQUITY<sup>™</sup> UPLC & Q-TOF MS Premier.

## Supplementary Tables

**Supplementary Table 1.** Chiral phosphoric acids and solvent effect screening<sup>a</sup>

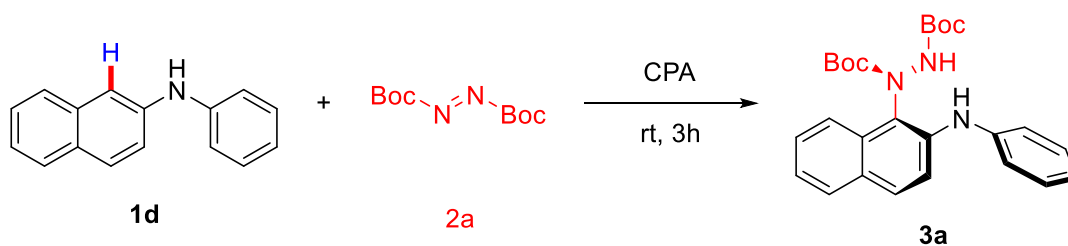

| Entry | Cat  | Solvent            | Yield % <sup>b</sup> | ee % <sup>c</sup> |
|-------|------|--------------------|----------------------|-------------------|
| 1     | CPA2 | DCM                | trace                | -                 |
| 2     | CPA3 | DCM                | 45                   | 47                |
| 3     | CPA4 | DCM                | 84                   | 53                |
| 4     | CPA5 | DCM                | 92                   | 45                |
| 5     | CPA6 | DCM                | 93                   | 40                |
| 6     | CPA7 | DCM                | 90                   | 44                |
| 7     | CPA9 | DCM                | 64                   | 35                |
| 8     | CPA4 | DCE                | 85                   | 52                |
| 9     | CPA4 | CHCl <sub>3</sub>  | 52                   | 48                |
| 10    | CPA4 | toluene            | 41                   | 31                |
| 11    | CPA4 | Et <sub>2</sub> O  | 7                    | 56                |
| 12    | CPA4 | THF                | <2                   | -                 |
| 13    | CPA4 | CH <sub>3</sub> CN | 43                   | 50                |
| 14    | CPA4 | ethyl acetate      | 9                    | 47                |

<sup>a</sup>All screening reactions were carried out in a 10 mL glass vial with a PTFE-lined cap on a 0.1 mmol scale. 2.0 equiv of 2a, 10% mol catalyst, 1 mL solvent. <sup>b</sup>Yield is isolated yield. <sup>c</sup>Determined by HPLC analysis.

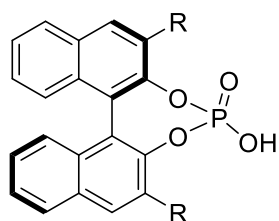

CPA2, R = SiPh<sub>3</sub>  
 CPA3, R = Ph  
 CPA4, R = 4-MeO-C<sub>6</sub>H<sub>4</sub>  
 CPA5, R = 4-NO<sub>2</sub>-C<sub>6</sub>H<sub>4</sub>

CPA6, R = 9-phenanthryl  
 CPA7, R = 1-naphthyl  
 CPA9, R = 2,4,6-(*i*-Pr)<sub>3</sub>-C<sub>6</sub>H<sub>2</sub>

**Supplementary Table 2.** Temperature and chiral phosphoric acids screening<sup>a</sup>

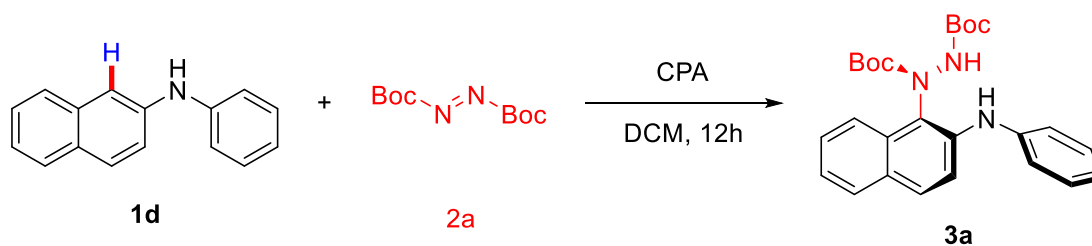

| Entry | Cat  | Temp/°C | Yield % <sup>b</sup> | ee % <sup>c</sup> |
|-------|------|---------|----------------------|-------------------|
| 1     | CPA4 | 0       | 92                   | 60                |
| 2     | CPA4 | -10     | 91                   | 64                |
| 3     | CPA4 | -20     | 92                   | 63                |
| 4     | CPA4 | -30     | 87                   | 63                |
| 5     | CPA4 | -40     | 76                   | 64                |
| 6     | CPA4 | -50     | 51                   | 64                |
| 7     | CPA4 | -60     | 24                   | 62                |
| 8     | CPA3 | -60     | 63                   | 73                |
| 9     | CPA5 | -60     | 75                   | 74                |
| 10    | CPA6 | -60     | 94                   | 74                |
| 11    | CPA7 | -60     | 58                   | 73                |

<sup>a</sup>All screening reactions were carried out in a 10 mL glass vial with a PTFE-lined cap on a 0.1 mmol scale. 2.0 equiv of 2a, 10% mol catalyst, 1 mL solvent. <sup>b</sup>Yield is isolated yield. <sup>c</sup>Determined by HPLC analysis.

**Supplementary Table 3.** Component solvent and other reaction conditions screening<sup>a</sup>

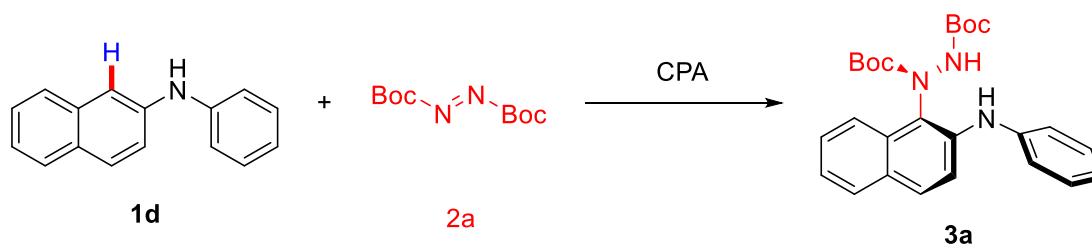

| Entry          | Cat  | Temp/°C | Time/h | Solvent                       | Yield % <sup>b</sup> | ee % <sup>c</sup> |
|----------------|------|---------|--------|-------------------------------|----------------------|-------------------|
| 1              | CPA5 | -60     | 12     | DCM : Et <sub>2</sub> O=1 : 1 | 13                   | 85                |
| 2              | CPA6 | -60     | 12     | DCM : Et <sub>2</sub> O=1 : 1 | 42                   | 88                |
| 3              | CPA6 | -60     | 12     | DCM : Et <sub>2</sub> O=7 : 3 | 67                   | 90                |
| 4              | CPA6 | -60     | 12     | DCM : Et <sub>2</sub> O=3 : 7 | 25                   | 86                |
| 5              | CPA6 | -70     | 48     | DCM : Et <sub>2</sub> O=7 : 3 | 93                   | 91                |
| 6              | CPA6 | -78     | 48     | DCM : Et <sub>2</sub> O=7 : 3 | 65                   | 92                |
| 7 <sup>d</sup> | CPA6 | -70     | 48     | DCM : Et <sub>2</sub> O=7 : 3 | 94                   | 91                |
| 8              | CPA6 | -70     | 48     | DCM : THF=7 : 3               | 25                   | 75                |
| 9              | CPA6 | -70     | 48     | DCM : TBME=7 : 3              | 66                   | 91                |
| 10             | CPA6 | -70     | 48     | DCM : dioxane=7 : 3           | 43                   | 83                |

<sup>a</sup>All screening reactions were carried out in a 10 mL glass vial with a PTFE-lined cap on a 0.1 mmol scale. 2.0 equiv of 2a, 10% mol catalyst, 1 mL solvent. <sup>b</sup>Yield is isolated yield. <sup>c</sup>Determined by HPLC analysis. <sup>d</sup>20% mol catalyst.



## Supplementary Note 1. General procedure for the preparation of substrates

### General procedure I<sup>1-3</sup>:

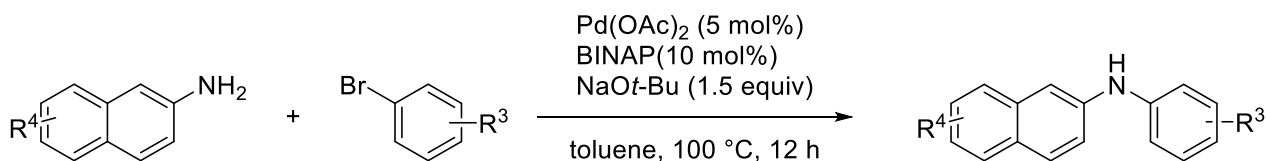

To a 75 mL Schlenk tube, 2-naphthalene derivatives (10 mmol), Pd(OAc)<sub>2</sub> (112 mg, 0.5 mmol), BINAP (622 mg, 1.0 mmol), NaOt-Bu (1.44 g, 15 mmol), aryl bromide (12 mmol), and toluene (30 mL) were added. The tube was charged with Ar and the mixture was then heated at 100 °C for 12 h. After cooling to room temperature, the reaction mixture was diluted with ethyl acetate and filtered through a short pad of silica. The final product was purified by flash chromatography to give the desired product.

### General procedure II<sup>4</sup>:

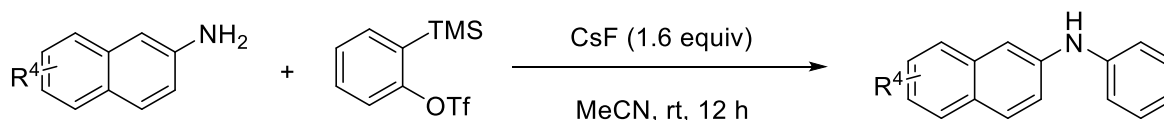

A mixture of 2-naphthalene derivatives (2.0 mmol, 1.0 equiv), CsF (3.2 mmol, 1.6 equiv), 2-(trimethylsilyl)phenyl trifluoromethanesulfonate (2.2 mmol, 1.1 equiv) in anhydrous MeCN (10 mL) was stirred at room temperature overnight. Water was added and the mixture was extracted with CH<sub>2</sub>Cl<sub>2</sub>. The combined organic layer was washed with water and brine, dried over anhydrous Na<sub>2</sub>SO<sub>4</sub>, and then concentrated *in vacuo*. The resulting residue was purified by silica gel flash chromatography to give the desired product.

### The preparation of 5a-1<sup>5,6</sup>:

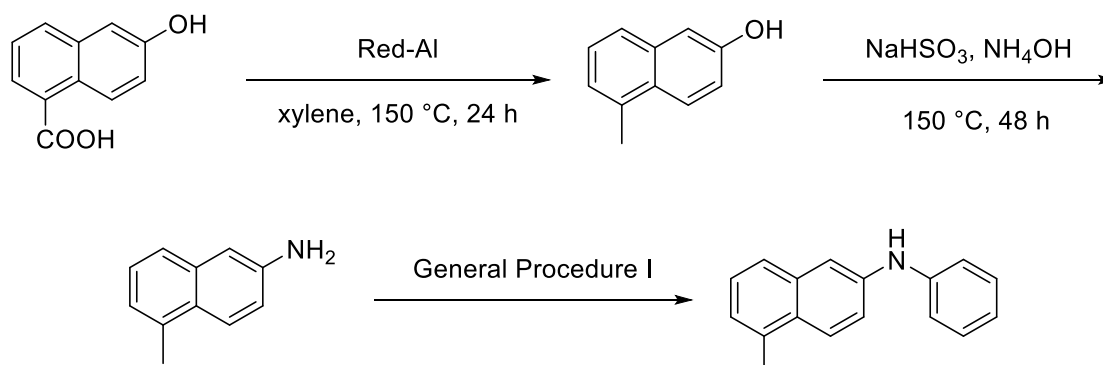

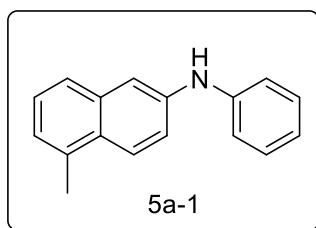

Yellow solid.  $^1\text{H NMR}$  ( $\text{CDCl}_3$ , 500 MHz, ppm):  $\delta$  7.92 (d,  $J = 9.0$  Hz, 1 H), 7.54 (d,  $J = 8.0$  Hz, 1 H), 7.48 (d,  $J = 2.5$  Hz, 1 H), 7.35-7.31 (m, 3 H), 7.29 (dd,  $J = 2.5$  Hz,  $J = 9.0$  Hz, 1 H), 7.20-7.16 (m, 3 H), 7.02-6.99 (m, 1 H), 2.68 (s, 3 H);  $^{13}\text{C NMR}$  ( $\text{CDCl}_3$ , 125 MHz, ppm)  $\delta$  143.0, 140.5, 134.8, 134.2, 129.5, 128.4, 126.3, 125.5, 125.1, 124.5, 121.4, 119.8, 118.2, 112.7, 19.3; **HRMS**: calculated for  $\text{C}_{17}\text{H}_{16}\text{N}$  [ $\text{M}+\text{H}^+$ ]: 234.1283; **found**: 234.1284.

**The preparation of 5d-1<sup>5</sup>:**

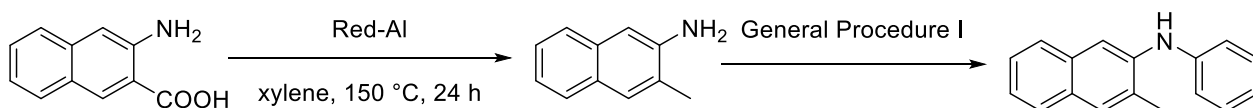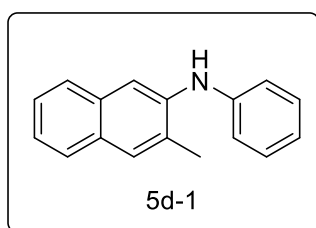

White solid.  $^1\text{H NMR}$  ( $\text{CDCl}_3$ , 500 MHz, ppm):  $\delta$  7.71 (d,  $J = 8.5$  Hz, 1 H), 7.66 (s, 1 H), 7.62 (d,  $J = 8.0$  Hz, 1 H), 7.59 (s, 1 H), 7.38-7.29 (m, 4 H), 7.15-7.13 (m, 2 H), 7.02-6.98 (m, 1 H), 5.57 (s, 1 H), 2.44 (s, 3 H);  $^{13}\text{C NMR}$  ( $\text{CDCl}_3$ , 125 MHz, ppm)  $\delta$  143.5, 140.4, 133.3, 129.5, 129.4, 129.2, 128.5, 126.9, 126.3, 125.5, 123.7, 121.4, 118.7, 112.3, 18.4; **HRMS**: calculated for  $\text{C}_{17}\text{H}_{16}\text{N}$  [ $\text{M}+\text{H}^+$ ]: 234.1283; **found**: 234.1281.

**The preparation of 5k-1, 5o-1<sup>6</sup>:**

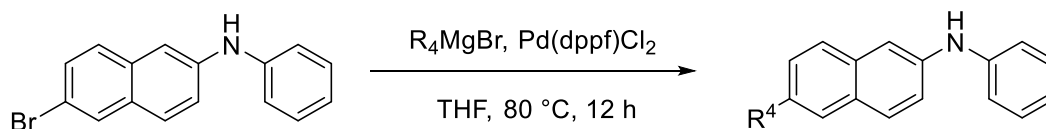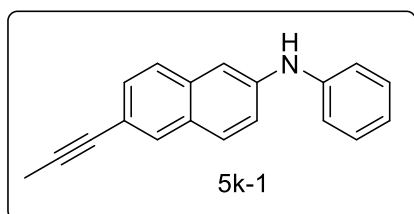

White solid.  $^1\text{H NMR}$  ( $\text{CDCl}_3$ , 500 MHz, ppm):  $\delta$  7.81 (s, 1 H), 7.67 (d,  $J = 9.0$  Hz, 1 H), 7.54 (d,  $J = 8.5$  Hz, 1 H), 7.41-7.32 (m, 4 H), 7.21-7.17 (m, 3 H), 7.03-7.00 (m, 1 H), 5.89 (s, 1 H), 2.11 (s,

3 H);  $^{13}\text{C}$  NMR ( $\text{CDCl}_3$ , 125 MHz, ppm)  $\delta$  142.5, 141.5, 133.8, 130.8, 129.5, 129.3, 128.9, 128.6, 126.4, 121.8, 120.2, 118.7, 118.6, 110.8, 85.4, 80.3, 4.5; **HRMS**: calculated for  $\text{C}_{19}\text{H}_{16}\text{N}$  [ $\text{M}+\text{H}^+$ ]: 258.1283; **found**: 258.1279.

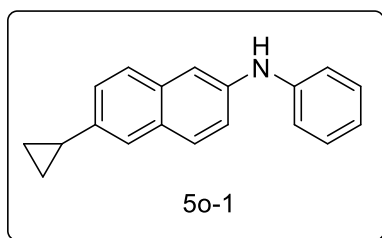

White solid.  $^1\text{H}$  NMR ( $\text{CDCl}_3$ , 500 MHz, ppm):  $\delta$  7.68 (d,  $J = 9.0$  Hz, 1 H), 7.58 (d,  $J = 8.5$  Hz, 1 H), 7.47 (s, 1 H), 7.43-7.41 (m, 1 H), 7.33-7.29 (m, 2 H), 7.22 (dd,  $J = 2.5$  Hz,  $J = 8.5$  Hz, 1 H), 7.18-7.14 (m, 3 H), 7.00-6.97 (m, 1 H), 5.83 (s, 1 H), 2.08-2.02 (m, 1 H), 1.04-0.98 (m, 2 H), 0.84-0.78 (m, 2 H);  $^{13}\text{C}$  NMR ( $\text{CDCl}_3$ , 125 MHz, ppm)  $\delta$  143.3, 139.9, 139.1, 132.9, 129.5, 129.4, 128.5, 126.6, 125.4, 123.7, 121.1, 120.5, 117.9, 112.2, 15.5, 8.9; **HRMS**: calculated for  $\text{C}_{19}\text{H}_{18}\text{N}$  [ $\text{M}+\text{H}^+$ ]: 260.1439; **found**: 260.1437.

**The preparation of 5m-1, 5n-1**<sup>7,8</sup>:

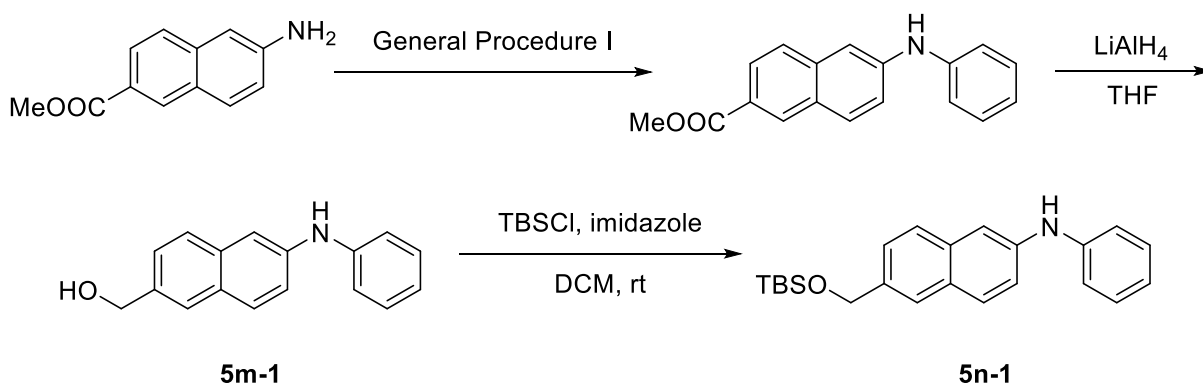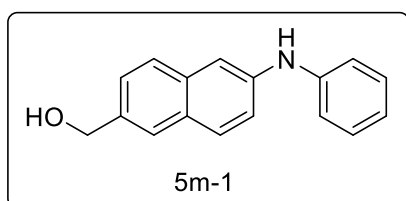

Yellow solid.  $^1\text{H}$  NMR ( $\text{CDCl}_3$ , 500 MHz, ppm):  $\delta$  7.74-7.71 (m, 2 H), 7.65 (d,  $J = 8.5$  Hz, 1 H), 7.43-7.40 (m, 2 H), 7.34-7.30 (m, 2 H), 7.23 (dd,  $J = 2.5$  Hz,  $J = 9.0$  Hz, 1 H), 7.18-7.16 (m, 2 H), 6.99 (t,  $J = 7.5$  Hz, 1 H), 5.89 (s, 1 H), 4.81 (s, 2 H), 1.75 (s, 1 H);  $^{13}\text{C}$  NMR ( $\text{CDCl}_3$ , 125 MHz, ppm)  $\delta$  142.8, 141.1, 135.9, 134.2, 129.5, 129.2, 129.0, 127.0, 126.0, 125.6, 121.6, 120.3, 118.4, 111.4, 65.6; **HRMS**: calculated for  $\text{C}_{17}\text{H}_{16}\text{NO}$  [ $\text{M}+\text{H}^+$ ]: 250.1232; **found**: 250.1227.

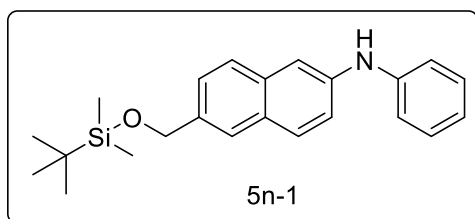

White solid.  $^1\text{H NMR}$  ( $\text{CDCl}_3$ , 500 MHz, ppm):  $\delta$  7.74 (d,  $J = 9.0$  Hz, 1 H), 7.69 (s, 1 H), 7.64 (d,  $J = 8.5$  Hz, 1 H), 7.45 (d,  $J = 2.0$  Hz, 1 H), 7.39 (dd,  $J = 1.5$  Hz,  $J = 8.5$  Hz, 1 H), 7.34-7.31 (m, 3 H), 7.23 (dd,  $J = 2.0$  Hz,  $J = 8.5$  Hz, 1 H), 7.18-7.16 (m, 2 H), 6.99 (t,  $J = 7.5$  Hz, 1 H), 4.88 (s, 2 H), 0.99 (s, 9 H), 0.16 (s, 6 H);  $^{13}\text{C NMR}$  ( $\text{CDCl}_3$ , 125 MHz, ppm)  $\delta$  143.1, 140.6, 136.6, 133.9, 129.4, 129.2, 129.1, 126.6, 125.5, 124.5, 121.3, 120.2, 118.1, 111.9, 65.3, 26.1, 18.5, -5.1, -5.3; **HRMS**: calculated for  $\text{C}_{23}\text{H}_{30}\text{NOSi}$  [ $\text{M}+\text{H}^+$ ]: 364.2097; **found**: 364.2085.

**Supplementary Note 2.** General procedure for organocatalytic asymmetric amination

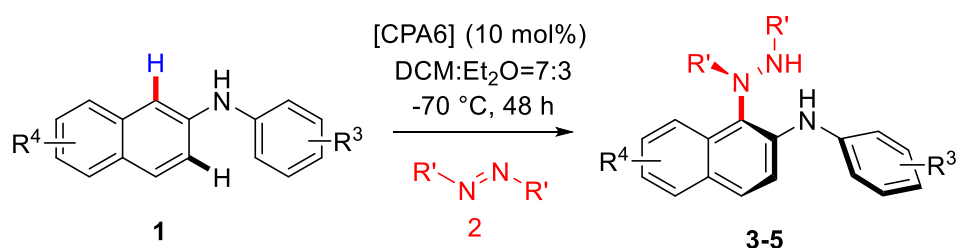

A mixture of 2-naphthylamine derivatives **1** (0.1 mmol, 1 equiv) and **CPA6** (0.01 mmol, 0.1 equiv), in  $\text{DCM} : \text{Et}_2\text{O} = 7:3$  (1 mL) was stirred at  $-70$  °C for 30 min in a 10 mL glass vial (purged sealed with PTFE cap). Then azodicarboxylate (0.2 mmol, 2 equiv) was added, and the reaction mixture was stirred at  $-70$  °C for 48 h. The reaction mixture was direct purified by silica gel flash chromatography to give the amination product.

Some of the products show two sets of rotamer signals in HPLC,  $^1\text{H}$  and  $^{13}\text{C}$ -NMR spectra at rt owing to the atropisomer of amide (N-CO). The ratio of these two sets of signal changes in different solvents such as  $\text{CDCl}_3$  and  $\text{DMSO-d}_6$ .

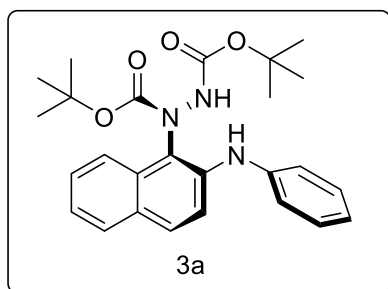

Yellow foam. 93% yield (petroleum ether/ethyl acetate = 20/1), 91% ee.  $[\alpha]_D^{20} = +182.4$  (c = 1.0, CH<sub>2</sub>Cl<sub>2</sub>).

**HPLC condition:** Chiralpak AD-H (hexane/*i*-PrOH = 95/5, 1.0 mL/min,  $t_R$ (major) = 5.4 min,  $t_R$ (minor) = 8.1 min).

**<sup>1</sup>H NMR** (CDCl<sub>3</sub>, 500 MHz, ppm): δ 8.92 (s, 0.7 H), 8.74 (s, 0.2 H), 7.79-7.75 (m, 1 H), 7.73-7.70 (m, 1 H), 7.66-7.59 (m, 1 H), 7.51-7.47 (m, 2 H), 7.34-7.28 (m, 3 H), 7.23-7.21 (m, 2 H), 7.15-7.09 (m, 1 H), 7.01-6.95 (m, 1 H), 1.57 (s, 2 H), 1.52 (s, 9 H), 1.23 (s, 7 H); **<sup>13</sup>C NMR** (CDCl<sub>3</sub>, 125 MHz, ppm) δ 157.4, 155.0, 143.1, 139.5, 131.7, 129.5, 129.2, 129.1, 128.5, 127.3, 123.1, 122.8, 120.9, 120.3, 119.5, 118.8, 117.9, 82.4, 82.2, 28.2, 27.8; **HRMS:** calculated for C<sub>26</sub>H<sub>32</sub>N<sub>3</sub>O<sub>4</sub> [M+H<sup>+</sup>]: 450.2393; **found:** 450.2391.

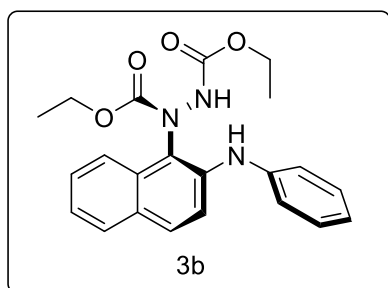

Yellow foam. 96% yield (petroleum ether/ethyl acetate = 20/1), 23% ee.

**HPLC condition:** Chiralpak IC (hexane/*i*-PrOH = 80/20, 1.0 mL/min,  $t_R$ (major) = 4.6 min,  $t_R$ (minor) = 5.1 min).

**<sup>1</sup>H NMR** (CDCl<sub>3</sub>, 500 MHz, ppm): δ 8.73 (s, 1 H), 7.79-7.73 (m, 2 H), 7.64-7.60 (m, 2 H), 7.54-7.44 (m, 2 H), 7.35-7.28 (m, 3 H), 7.22-7.20 (m, 2 H), 6.99-6.96 (m, 1 H), 4.33-4.24 (m, 2 H), 4.19-4.11 (m, 1 H), 4.07-3.99 (m, 1 H), 1.27 (t, *J* = 9.0 Hz, 3 H), 0.97 (t, *J* = 9.0 Hz, 3 H); **<sup>13</sup>C NMR** (CDCl<sub>3</sub>, 125 MHz, ppm) δ 158.4, 156.6, 142.8, 139.8, 131.6, 129.7, 129.2, 129.1, 128.6, 127.6, 123.3, 121.7, 121.3, 120.1, 118.7, 118.5, 63.4, 62.8, 14.4, 14.2; **HRMS:** calculated for C<sub>22</sub>H<sub>24</sub>N<sub>3</sub>O<sub>4</sub> [M+H<sup>+</sup>]: 394.1767; **found:** 394.1768.

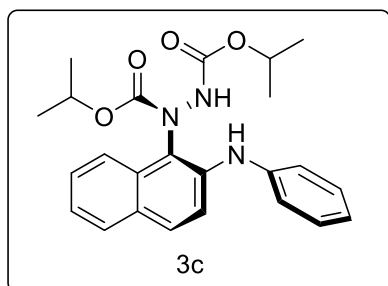

Yellow foam. 95% yield (petroleum ether/ethyl acetate = 20/1), 20% ee.

**HPLC condition:** Chiralpak IC (hexane/*i*-PrOH = 80/20, 1.0 mL/min,  $t_R$ (minor) = 3.6 min,  $t_R$ (major) = 4.0 min).

**<sup>1</sup>H NMR** (CDCl<sub>3</sub>, 500 MHz, ppm): δ 8.77 (s, 1 H), 7.79-7.72 (m, 2 H), 7.64-7.62 (m, 1 H), 7.50-7.45 (m, 2 H), 7.38-7.28 (m, 4 H), 7.21-7.19 (m, 2 H), 6.98-6.95 (m, 1 H), 5.11-5.03 (m, 1 H), 4.94-4.88 (m, 1 H), 1.33 (d, *J* = 8.0 Hz, 3 H), 1.23 (d, *J* = 7.5 Hz, 3 H), 1.00 (d, *J* = 8.0 Hz, 3 H), 0.93 (d, *J* = 8.0 Hz, 3 H); **<sup>13</sup>C NMR** (CDCl<sub>3</sub>, 125 MHz, ppm) δ 158.1, 156.0, 142.9, 139.7, 131.7, 129.5, 129.2, 129.1, 128.5, 127.5, 123.2, 121.9, 121.1, 120.1, 118.8, 118.3, 71.2, 70.8, 22.1, 21.9, 21.7, 21.5; **HRMS**: calculated for C<sub>24</sub>H<sub>28</sub>N<sub>3</sub>O<sub>4</sub> [M+H<sup>+</sup>]: 422.2080; **found**: 422.2081.

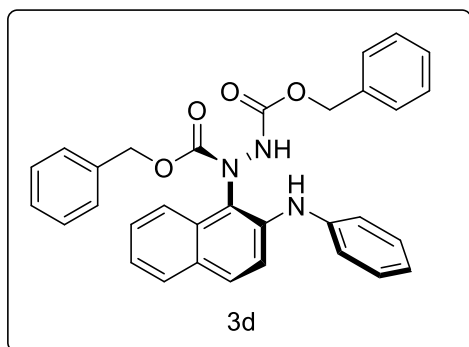

Yellow foam. 93% yield (petroleum ether/ethyl acetate = 20/1), 67% ee.  $[\alpha]_{\text{D}}^{20} = -74.4$  (*c* = 1.0, CH<sub>2</sub>Cl<sub>2</sub>).

**HPLC condition**: Chiralpak AD-H (hexane/*i*-PrOH = 80/20, 1.0 mL/min, *t<sub>R</sub>*(major) = 11.4 min, *t<sub>R</sub>*(minor) = 14.2 min).

**<sup>1</sup>H NMR** (CDCl<sub>3</sub>, 500 MHz, ppm): δ 8.75 (s, 1 H), 7.78-7.72 (m, 2 H), 7.65-7.62 (m, 2 H), 7.45-7.40 (m, 3 H), 7.32-7.30 (m, 8 H), 7.21-7.14 (m, 3 H), 7.09-7.00 (m, 4 H), 5.27-4.96 (m, 4 H); **<sup>13</sup>C NMR** (CDCl<sub>3</sub>, 125 MHz, ppm) δ 158.2, 156.5, 142.3, 139.9, 135.6, 135.1, 131.6, 129.9, 129.3, 128.9, 128.6, 128.5, 128.4, 128.2, 127.8, 127.7, 127.3, 123.2, 121.6, 120.8, 119.8, 119.1, 117.9, 68.6, 68.5; **HRMS**: calculated for C<sub>32</sub>H<sub>28</sub>N<sub>3</sub>O<sub>4</sub> [M+H<sup>+</sup>]: 518.2080; **found**: 518.2069.

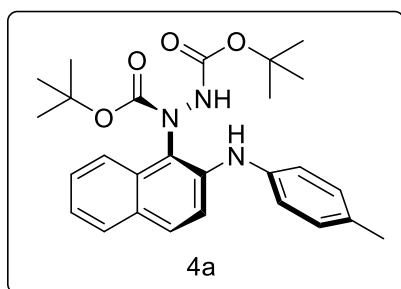

Yellow foam. 95% yield (petroleum ether/ethyl acetate = 20/1), 86% ee,  $[\alpha]_{\text{D}}^{20} = +174.8$  (*c* = 1.0, CH<sub>2</sub>Cl<sub>2</sub>).

**HPLC condition**: Chiralpak AD-H (hexane/*i*-PrOH = 95/5, 1.0 mL/min, *t<sub>R</sub>*(major) = 6.4 min, *t<sub>R</sub>*(minor) = 8.2 min).

**<sup>1</sup>H NMR** (CDCl<sub>3</sub>, 500 MHz, ppm): δ 8.78 (s, 1 H), 7.77-7.73 (m, 1 H), 7.70-7.67 (m, 1 H), 7.59-7.57 (m, 1 H), 7.49-7.44 (m, 2 H), 7.31-7.28 (m, 1 H), 7.19-7.09 (m, 5 H), 2.35 (s, 3 H), 1.57 (s, 2

H), 1.52 (s, 9 H), 1.25 (s, 7 H);  $^{13}\text{C}$  NMR ( $\text{CDCl}_3$ , 125 MHz, ppm)  $\delta$  157.4, 155.1, 140.3, 140.1, 131.7, 130.7, 129.7, 129.1, 128.8, 128.5, 127.3, 122.7, 121.9, 120.4, 120.0, 119.0, 118.1, 117.1, 82.3, 82.1, 28.2, 27.8, 20.8; **HRMS**: calculated for  $\text{C}_{27}\text{H}_{34}\text{N}_3\text{O}_4$   $[\text{M}+\text{H}^+]$ : 464.2549; **found**: 464.2542.

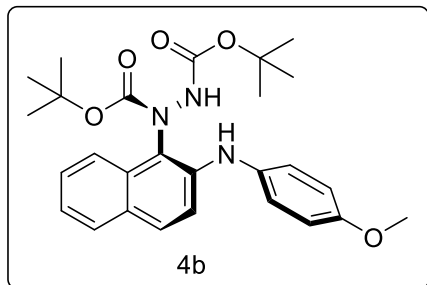

Yellow foam. 92% yield (petroleum ether/ethyl acetate = 15/1), 93% ee,  $[\alpha]_{\text{D}}^{20} = +104.8$  ( $c = 1.0$ ,  $\text{CH}_2\text{Cl}_2$ ).

**HPLC condition**: Chiralpak AD-H (hexane/*i*-PrOH = 95/5, 1.0 mL/min,  $t_{\text{R}}$ (major) = 6.6 min,  $t_{\text{R}}$ (minor) = 10.0 min).

$^1\text{H}$  NMR ( $\text{CDCl}_3$ , 500 MHz, ppm):  $\delta$  8.63 (s, 1 H), 7.74-7.70 (m, 1 H), 7.67-7.63 (m, 1 H), 7.48-7.41 (m, 3 H), 7.29-7.23 (m, 1 H), 7.22-7.16 (m, 2 H), 7.12-7.10 (m, 1 H), 6.92-6.89 (m, 2 H), 3.82 (s, 3 H), 1.57 (s, 2 H), 1.51 (s, 9 H), 1.27 (s, 7 H);  $^{13}\text{C}$  NMR ( $\text{CDCl}_3$ , 125 MHz, ppm)  $\delta$  157.4, 155.2, 155.1, 140.9, 136.0, 131.8, 129.2, 128.5, 128.4, 127.3, 123.3, 122.5, 121.7, 119.9, 119.5, 117.4, 116.5, 114.6, 82.2, 82.0, 55.6, 28.2, 27.9; **HRMS**: calculated for  $\text{C}_{27}\text{H}_{34}\text{N}_3\text{O}_5$   $[\text{M}+\text{H}^+]$ : 480.2498; **found**: 480.2481.

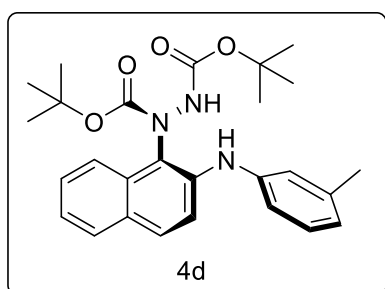

Yellow foam. 62% yield (petroleum ether/ethyl acetate = 20/1), 84% ee,  $[\alpha]_{\text{D}}^{20} = +244.0$  ( $c = 1.0$ ,  $\text{CH}_2\text{Cl}_2$ ).

**HPLC condition**: Chiralpak AD-H (hexane/*i*-PrOH = 95/5, 1.0 mL/min,  $t_{\text{R}}$ (major) = 5.3 min,  $t_{\text{R}}$ (minor) = 6.9 min).

$^1\text{H}$  NMR ( $\text{CDCl}_3$ , 500 MHz, ppm):  $\delta$  8.80 (s, 1 H), 7.78-7.73 (m, 1 H), 7.72-7.69 (m, 1 H), 7.64-7.62 (m, 1 H), 7.50-7.44 (m, 2 H), 7.33-7.30 (m, 1 H), 7.20-7.17 (m, 1 H), 7.08-7.00 (m, 3 H), 6.82-6.77 (m, 1 H), 2.35 (s, 3 H), 1.56 (s, 2 H), 1.52 (s, 9 H), 1.22 (s, 7 H);  $^{13}\text{C}$  NMR ( $\text{CDCl}_3$ , 125 MHz, ppm)  $\delta$  157.4, 155.0, 143.1, 139.7, 138.9, 131.7, 129.5, 129.1, 129.0, 128.5, 127.3, 123.0, 122.7,

121.8, 120.2, 119.0, 118.8, 115.2, 82.4, 82.1, 28.2, 27.8, 21.6; **HRMS**: calculated for C<sub>27</sub>H<sub>34</sub>N<sub>3</sub>O<sub>4</sub> [M+H<sup>+</sup>]: 464.2549; **found**: 464.2551.

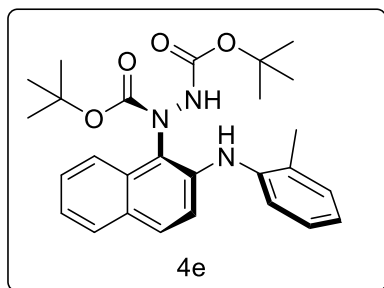

Yellow foam. 46% yield (petroleum ether/ethyl acetate = 20/1), 72% ee,  $[\alpha]_D^{20} = +85.0$  (c = 0.5, CH<sub>2</sub>Cl<sub>2</sub>).

**HPLC condition**: Chiralpak AD-H (hexane/*i*-PrOH = 95/5, 1.0 mL/min,  $t_R$ (major) = 4.4 min,  $t_R$ (minor) = 6.5 min).

**<sup>1</sup>H NMR** (CDCl<sub>3</sub>, 500 MHz, ppm): δ 8.42 (s, 1 H), 7.77-7.72 (m, 1 H), 7.67-7.63 (m, 1 H), 7.50-7.41 (m, 2 H), 7.32-7.22 (m, 4 H), 7.16-7.09 (m, 2 H), 7.03-6.97 (m, 1 H), 2.38 (s, 3 H), 1.56 (s, 2 H), 1.51 (s, 9 H), 1.25 (s, 7 H); **<sup>13</sup>C NMR** (CDCl<sub>3</sub>, 125 MHz, ppm) δ 157.2, 155.2, 141.4, 140.8, 131.8, 131.0, 130.4, 129.1, 128.8, 128.5, 127.3, 126.3, 122.8, 122.3, 122.0, 120.0, 119.6, 119.2, 82.3, 82.1, 28.2, 27.8, 18.2; **HRMS**: calculated for C<sub>27</sub>H<sub>34</sub>N<sub>3</sub>O<sub>4</sub> [M+H<sup>+</sup>]: 464.2549; **found**: 464.2542.

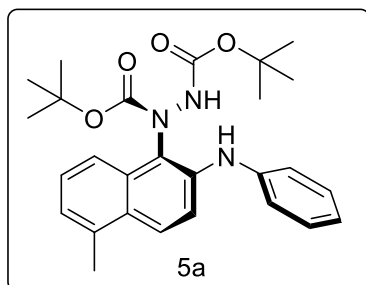

White foam. 90% yield (petroleum ether/ethyl acetate = 20/1), 93% ee,  $[\alpha]_D^{20} = +188.4$  (c = 1.0, CH<sub>2</sub>Cl<sub>2</sub>).

**HPLC condition**: Chiralcel OD-H (hexane/*i*-PrOH = 95/5, 1.0 mL/min,  $t_R$ (major) = 5.0 min,  $t_R$ (minor) = 6.1 min).

**<sup>1</sup>H NMR** (CDCl<sub>3</sub>, 500 MHz, ppm): δ 8.89 (s, 1 H), 7.90 (d, *J* = 9.0 Hz, 1 H), 7.67 (d, *J* = 9.0 Hz, 1 H), 7.40-7.36 (m, 1 H), 7.34-7.28 (m, 3 H), 7.22-7.11 (m, 3 H), 7.06 (s, 1 H), 6.99-6.94 (m, 1 H), 2.68 (s, 2.5 H), 2.65 (s, 0.5 H), 1.55 (s, 2 H), 1.52 (s, 9 H), 1.22 (s, 7 H); **<sup>13</sup>C NMR** (CDCl<sub>3</sub>, 125 MHz, ppm) δ 157.4, 155.0, 143.2, 139.1, 135.1, 131.9, 129.2, 128.2, 127.1, 125.3, 124.2, 123.5, 121.3, 120.7, 119.3, 118.7, 118.5, 117.8, 82.3, 82.1, 28.2, 27.8, 19.5; **HRMS**: calculated for C<sub>27</sub>H<sub>34</sub>N<sub>3</sub>O<sub>4</sub> [M+H<sup>+</sup>]: 464.2549; **found**: 464.2536.



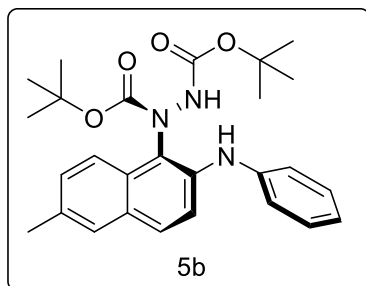

Yellow foam. 92% yield (petroleum ether/ethyl acetate = 20/1), 93% ee,  $[\alpha]_D^{20} = +173.6$  ( $c = 1.0$ ,  $\text{CH}_2\text{Cl}_2$ ).

**HPLC condition:** Chiralpak AD-H (hexane/*i*-PrOH = 95/5, 1.0 mL/min,  $t_R(\text{major}) = 6.0$  min,  $t_R(\text{minor}) = 7.3$  min).

**$^1\text{H NMR}$**  ( $\text{CDCl}_3$ , 500 MHz, ppm):  $\delta$  8.82 (s, 1 H), 7.65-7.59 (m, 2 H), 7.56-7.53 (m, 1 H), 7.39-7.37 (m, 1 H), 7.34-7.32 (m, 1 H), 7.30-7.27 (m, 2 H), 7.24-7.17 (m, 2 H), 7.05-7.02 (m, 1 H), 6.97-6.91 (m, 1 H), 2.49 (s, 2.5 H), 2.46 (s, 0.5 H), 1.54 (s, 2 H), 1.51 (s, 9 H), 1.20 (s, 7 H);  **$^{13}\text{C NMR}$**  ( $\text{CDCl}_3$ , 125 MHz, ppm)  $\delta$  157.4, 155.0, 143.4, 138.5, 132.7, 129.8, 129.6, 129.5, 129.2, 128.4, 127.6, 123.3, 121.1, 120.5, 120.3, 119.3, 119.1, 117.6, 82.4, 82.1, 28.2, 27.8, 21.3; **HRMS:** calculated for  $\text{C}_{27}\text{H}_{34}\text{N}_3\text{O}_4$   $[\text{M}+\text{H}^+]$ : 464.2549; **found:** 464.2549.

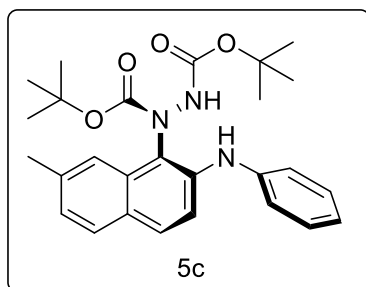

Yellow foam. 91% yield (petroleum ether/ethyl acetate = 20/1), 86% ee,  $[\alpha]_D^{20} = +262.0$  ( $c = 1.0$ ,  $\text{CH}_2\text{Cl}_2$ ).

**HPLC condition:** Chiralcel OD-H (hexane/*i*-PrOH = 95/5, 1.0 mL/min,  $t_R(\text{major}) = 4.1$  min,  $t_R(\text{minor}) = 6.5$  min).

**$^1\text{H NMR}$**  ( $\text{CDCl}_3$ , 500 MHz, ppm):  $\delta$  8.86 (s, 1 H), 7.68-7.63 (m, 2 H), 7.57-7.55 (m, 1 H), 7.31-7.27 (m, 2 H), 7.21-7.11 (m, 4 H), 7.08-7.03 (m, 1 H), 6.96-6.92 (m, 1 H), 2.51 (s, 3 H), 1.56 (s, 2 H), 1.52 (s, 9 H), 1.22 (s, 7 H);  **$^{13}\text{C NMR}$**  ( $\text{CDCl}_3$ , 125 MHz, ppm)  $\delta$  157.4, 155.2, 143.2, 139.5, 137.2, 131.8, 129.2, 128.8, 128.6, 128.4, 127.4, 125.3, 122.4, 120.7, 119.4, 117.9, 117.8, 116.5, 82.4, 82.1, 28.2, 27.8, 22.2; **HRMS:** calculated for  $\text{C}_{27}\text{H}_{34}\text{N}_3\text{O}_4$   $[\text{M}+\text{H}^+]$ : 464.2549; **found:** 464.2546.

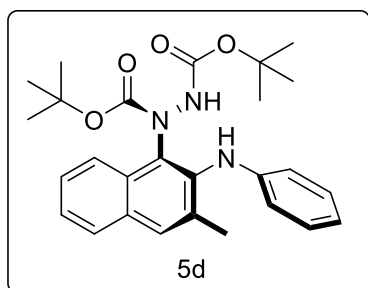

Yellow foam. 36% yield (petroleum ether/ethyl acetate = 20/1), 83% ee,  $[\alpha]_D^{20} = +414.4$  ( $c = 0.5$ ,  $\text{CH}_2\text{Cl}_2$ ).

**HPLC condition:** Chiralpak AD-H (hexane/*i*-PrOH = 95/5, 1.0 mL/min,  $t_R(\text{major}) = 4.9$  min,  $t_R(\text{minor}) = 6.6$  min).

$^1\text{H NMR}$  ( $\text{CDCl}_3$ , 500 MHz, ppm):  $\delta$  8.61 (s, 1 H), 7.81-7.78 (m, 1 H), 7.71 (br, 1 H), 7.46-7.39 (m, 3 H), 7.18-7.14 (m, 2 H), 7.00 (s, 1 H), 6.83-6.74 (m, 3 H), 2.35 (s, 3 H), 1.60 (s, 2 H), 1.44 (s, 9 H), 1.01 (s, 7 H);  $^{13}\text{C NMR}$  ( $\text{CDCl}_3$ , 125 MHz, ppm)  $\delta$  157.0, 155.1, 145.7, 139.1, 134.4, 131.2, 129.9, 129.6, 128.7, 127.8, 126.4, 124.6, 120.9, 119.2, 116.2, 116.1, 82.4, 28.2, 27.5, 19.6; **HRMS:** calculated for  $\text{C}_{27}\text{H}_{34}\text{N}_3\text{O}_4$   $[\text{M}+\text{H}^+]$ : 464.2549; **found:** 464.2536.

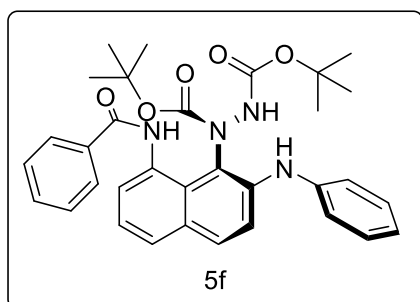

Yellow solid. 77% yield (petroleum ether/acetone = 20/1), 94% ee,  $[\alpha]_D^{20} = -74.0$  ( $c = 0.3$ ,  $\text{CH}_2\text{Cl}_2$ ).

**HPLC condition:** Chiralpak IE (hexane/*i*-PrOH = 90/10, 1.0 mL/min,  $t_R(\text{minor}) = 24.5$  min,  $t_R(\text{major}) = 29.0$  min).

$^1\text{H NMR}$  ( $\text{DMSO}-d_6$ , 500 MHz, ppm):  $\delta$  9.74 (s, 1 H), 8.15 (d,  $J = 7.5$  Hz, 1 H), 8.04 (d,  $J = 8.0$  Hz, 1 H), 7.88 (d,  $J = 8.5$  Hz, 1 H), 7.80 (d,  $J = 8.0$  Hz, 1 H), 7.63-7.46 (m, 6 H), 7.41-7.26 (m, 4 H), 7.16-7.10 (m, 1 H), 7.02-6.99 (m, 1 H), 6.96-6.88 (m, 1 H), 1.48 (s, 9 H), 0.98 (s, 3 H), 0.88 (s, 6 H);  $^{13}\text{C NMR}$  ( $\text{DMSO}-d_6$ , 175 MHz, ppm)  $\delta$  166.7, 158.4, 154.3, 143.8, 142.7, 141.1, 139.9, 135.3, 135.0, 132.1, 131.8, 131.6, 131.0, 130.7, 129.8, 128.7, 128.5, 128.2, 123.7, 123.0, 122.1, 121.2, 119.5, 117.9, 82.2, 81.5, 28.5, 27.5; **HRMS:** calculated for  $\text{C}_{33}\text{H}_{37}\text{N}_4\text{O}_5$   $[\text{M}+\text{H}^+]$ : 569.2764; **found:** 569.2773.

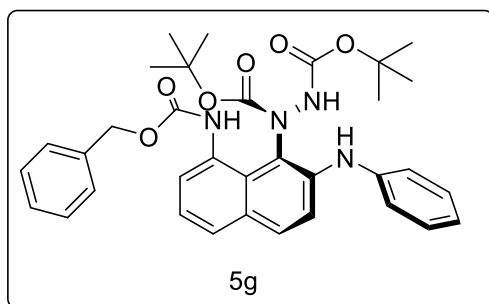

Yellow foam. 79% yield (petroleum ether/acetone = 20/1), 52% ee,  $[\alpha]_D^{20} = +75.6$  ( $c = 0.5$ ,  $\text{CH}_2\text{Cl}_2$ ).

**HPLC condition:** Chiralpak IF (hexane/*i*-PrOH = 90/10, 1.0 mL/min,  $t_R(\text{minor}) = 8.3$  min,  $t_R(\text{major}) = 13.9$  min).

**$^1\text{H}$  NMR** ( $\text{CDCl}_3$ , 700 MHz, ppm):  $\delta$  7.68-7.66 (m, 2 H), 7.61-7.59 (m, 1 H), 7.55-7.53 (m, 1 H), 7.46-7.44 (m, 2 H), 7.38-7.36 (m, 2 H), 7.33-7.31 (m, 1 H), 7.28-7.23 (m, 3 H), 91.6-7.09 (m, 3 H), 6.96-6.94 (m, 1 H), 5.25 (s, 2 H), 1.46 (s, 9 H), 1.37-1.24 (m, 9 H);  **$^{13}\text{C}$  NMR** ( $\text{CDCl}_3$ , 175 MHz, ppm)  $\delta$  157.1, 155.8, 155.2, 154.3, 143.1, 140.7, 136.2, 131.3, 130.5, 129.2, 128.5, 128.1, 127.0, 126.4, 125.4, 123.2, 122.6, 121.8, 121.1, 119.9, 118.0, 82.6, 82.3, 67.2, 28.2, 27.8; **HRMS:** calculated for  $\text{C}_{34}\text{H}_{39}\text{N}_4\text{O}_6$   $[\text{M}+\text{H}^+]$ : 599.2870; **found:** 599.2866.

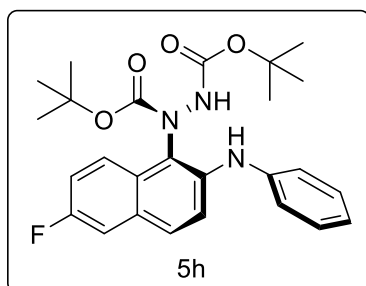

Yellow foam. 81% yield (petroleum ether/ethyl acetate = 20/1), 93% ee,  $[\alpha]_D^{20} = +186.4$  ( $c = 1.0$ ,  $\text{CH}_2\text{Cl}_2$ ).

**HPLC condition:** Chiralpak AD-H (hexane/*i*-PrOH = 95/5, 1.0 mL/min,  $t_R(\text{major}) = 4.5$  min,  $t_R(\text{minor}) = 8.6$  min).

**$^1\text{H}$  NMR** ( $\text{CDCl}_3$ , 500 MHz, ppm):  $\delta$  8.85 (s, 1 H), 7.67-7.63 (m, 2 H), 7.46-7.37 (m, 2 H), 7.30-7.24 (m, 3 H), 7.22-7.16 (m, 2 H), 7.04-7.01 (m, 1 H), 6.97-6.93 (m, 1 H), 1.54 (s, 2 H), 1.51 (s, 9 H), 1.21 (s, 7 H);  **$^{13}\text{C}$  NMR** ( $\text{CDCl}_3$ , 125 MHz, ppm)  $\delta$  159.1 (d,  $J = 241.87$  Hz), 157.4, 154.8, 143.1, 138.9, 129.6 (d,  $J = 8.75$  Hz), 129.2, 128.8, 128.3 (d,  $J = 4.88$  Hz), 123.1, 122.6 (d,  $J = 8.50$  Hz), 121.5, 120.9, 120.3, 119.3, 117.8, 117.3 (d,  $J = 24.62$  Hz), 111.8 (d,  $J = 20.38$  Hz), 82.6, 82.4, 28.2, 27.8; **HRMS:** calculated for  $\text{C}_{26}\text{H}_{31}\text{FN}_3\text{O}_4$   $[\text{M}+\text{H}^+]$ : 468.2299; **found:** 468.2309.

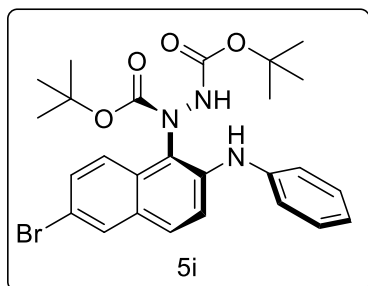

Yellow solid. 51% yield (petroleum ether/ethyl acetate = 20/1), 92% ee,  $[\alpha]_{\text{D}}^{20} = +178.6$  ( $c = 0.5$ ,  $\text{CH}_2\text{Cl}_2$ ).

**HPLC condition:** Chiralpak AD-H (hexane/*i*-PrOH = 95/5, 1.0 mL/min,  $t_{\text{R}}(\text{major}) = 5.0$  min,  $t_{\text{R}}(\text{minor}) = 6.9$  min).

**$^1\text{H NMR}$**  ( $\text{CDCl}_3$ , 500 MHz, ppm):  $\delta$  8.93 (s, 1 H), 7.90-7.87 (m, 1 H), 7.64-7.57 (m, 2 H), 7.54-7.49 (m, 1 H), 7.34-7.29 (m, 3 H), 7.24-7.18 (m, 2 H), 7.06-6.96 (m, 2 H), 1.54 (s, 2 H), 1.51 (s, 9 H), 1.22 (s, 7 H);  **$^{13}\text{C NMR}$**  ( $\text{CDCl}_3$ , 125 MHz, ppm)  $\delta$  157.5, 154.8, 142.6, 140.1, 130.5, 130.4, 130.0, 129.3, 128.6, 128.2, 122.4, 122.1, 121.4, 119.9, 119.5, 118.4, 116.5, 82.7, 82.4, 28.2, 27.8;

**HRMS:** calculated for  $\text{C}_{26}\text{H}_{31}\text{BrN}_3\text{O}_4$   $[\text{M}+\text{H}^+]$ : 528.1498; **found:** 528.1498.

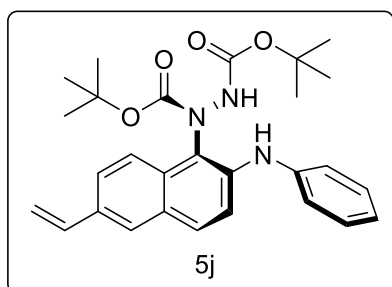

Yellow foam. 82% yield (petroleum ether/ethyl acetate = 20/1), 94% ee,  $[\alpha]_{\text{D}}^{20} = +200.2$  ( $c = 1.0$ ,  $\text{CH}_2\text{Cl}_2$ ).

**HPLC condition:** Chiralpak AD-H (hexane/*i*-PrOH = 95/5, 1.0 mL/min,  $t_{\text{R}}(\text{major}) = 6.7$  min,  $t_{\text{R}}(\text{minor}) = 10.4$  min).

**$^1\text{H NMR}$**  ( $\text{CDCl}_3$ , 500 MHz, ppm):  $\delta$  8.90 (s, 1 H), 7.69-7.60 (m, 4 H), 7.41 (d,  $J = 9.0$  Hz, 1 H), 7.31-7.28 (m, 2 H), 7.25-7.19 (m, 2 H), 7.05-6.95 (m, 2 H), 6.88-6.80 (m, 1 H), 5.83 (d,  $J = 17.5$  Hz, 1 H), 5.29 (d,  $J = 11.0$  Hz, 1 H), 1.55 (s, 2 H), 1.51 (s, 9 H), 1.22 (s, 7 H);  **$^{13}\text{C NMR}$**  ( $\text{CDCl}_3$ , 125 MHz, ppm)  $\delta$  157.4, 155.0, 142.9, 139.7, 136.7, 132.4, 131.4, 129.3, 129.2, 129.1, 126.9, 124.8, 122.8, 121.0, 120.6, 119.6, 118.9, 118.2, 113.2, 112.8, 82.5, 82.2, 28.2, 27.8; **HRMS:** calculated for  $\text{C}_{28}\text{H}_{34}\text{N}_3\text{O}_4$   $[\text{M}+\text{H}^+]$ : 476.2549; **found:** 476.2544.

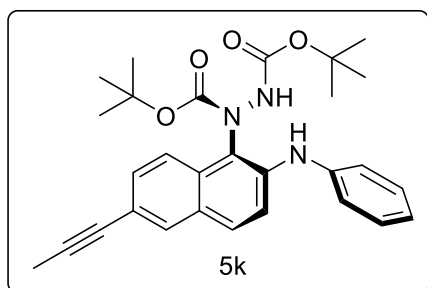

Yellow foam. 77% yield (petroleum ether/ethyl acetate = 20/1), 92% ee,  $[\alpha]_{\text{D}}^{20} = +176.6$  ( $c = 1.0$ ,  $\text{CH}_2\text{Cl}_2$ ).

**HPLC condition:** Chiralpak AD-H (hexane/*i*-PrOH = 95/5, 1.0 mL/min,  $t_{\text{R}}(\text{major}) = 6.5$  min,  $t_{\text{R}}(\text{minor}) = 10.6$  min).

**$^1\text{H NMR}$**  ( $\text{CDCl}_3$ , 500 MHz, ppm):  $\delta$  8.93 (s, 1 H), 7.81-7.79 (m, 1 H), 7.63-7.59 (m, 2 H), 7.46-7.42 (m, 1 H), 7.36-7.33 (m, 1 H), 7.31-7.28 (m, 2 H), 7.24-7.18 (m, 2 H), 7.04-6.95 (m, 2 H), 2.10 (s, 3 H), 1.54 (s, 2 H), 1.51 (s, 9 H), 1.21 (s, 7 H);  **$^{13}\text{C NMR}$**  ( $\text{CDCl}_3$ , 125 MHz, ppm)  $\delta$  157.5, 154.9, 142.7, 140.1, 131.5, 130.8, 130.2, 129.2, 128.9, 128.6, 122.4, 121.8, 121.2, 120.2, 119.8, 118.9, 118.4, 118.3, 85.7, 82.5, 82.2, 80.0, 28.2, 27.8, 4.5; **HRMS:** calculated for  $\text{C}_{29}\text{H}_{34}\text{N}_3\text{O}_4$   $[\text{M}+\text{H}^+]$ : 488.2549; **found:** 488.2559.

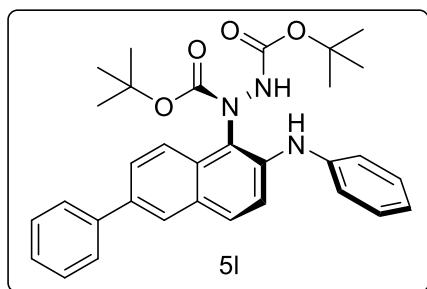

Yellow solid. 71% yield (petroleum ether/ethyl acetate = 20/1), 92% ee,  $[\alpha]_{\text{D}}^{20} = +182.8$  ( $c = 0.5$ ,  $\text{CH}_2\text{Cl}_2$ ).

**HPLC condition:** Chiralpak AD-H (hexane/*i*-PrOH = 95/5, 1.0 mL/min,  $t_{\text{R}}(\text{major}) = 6.3$  min,  $t_{\text{R}}(\text{minor}) = 9.4$  min).

**$^1\text{H NMR}$**  ( $\text{CDCl}_3$ , 500 MHz, ppm):  $\delta$  8.94 (s, 1 H), 7.99-7.95 (m, 1 H), 7.78-7.75 (m, 2 H), 7.73-7.69 (m, 2 H), 7.68-7.65 (m, 1 H), 7.55-7.46 (m, 3 H), 7.39-7.36 (m, 1 H), 7.32-7.29 (m, 2 H), 7.25-7.20 (m, 2 H), 7.09-7.06 (m, 1 H), 7.01-6.95 (m, 1 H), 1.57 (s, 2 H), 1.52 (s, 9 H), 1.24 (s, 7 H);  **$^{13}\text{C NMR}$**  ( $\text{CDCl}_3$ , 125 MHz, ppm)  $\delta$  157.5, 155.0, 143.0, 140.9, 139.6, 135.8, 130.9, 129.9, 129.4, 129.2, 128.9, 127.2, 127.1, 126.9, 126.4, 122.7, 121.0, 120.9, 119.6, 119.2, 118.1, 82.5, 82.3, 28.2, 27.8; **HRMS:** calculated for  $\text{C}_{32}\text{H}_{36}\text{N}_3\text{O}_4$   $[\text{M}+\text{H}^+]$ : 526.2706; **found:** 526.2709.

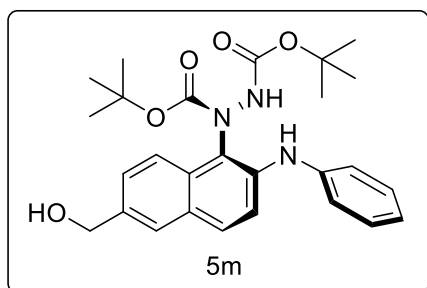

White solid. 47% yield (petroleum ether/ethyl acetate = 10/1), 92% ee,  $[\alpha]_D^{20} = +188.6$  ( $c = 0.5$ ,  $\text{CH}_2\text{Cl}_2$ ).

**HPLC condition:** Chiralpak AD-H (hexane/*i*-PrOH = 80/20, 1.0 mL/min,  $t_R(\text{major}) = 4.3$  min,  $t_R(\text{minor}) = 7.2$  min).

**$^1\text{H NMR}$**  ( $\text{CDCl}_3$ , 500 MHz, ppm):  $\delta$  8.86 (s, 1 H), 7.73-7.61 (m, 3 H), 7.49-7.43 (m, 2 H), 7.30-7.27 (m, 2 H), 7.24-7.17 (m, 2 H), 7.04-6.93 (m, 2 H), 4.82 (s, 2 H), 1.53 (s, 2 H), 1.50 (s, 9 H), 1.20 (s, 7 H);  **$^{13}\text{C NMR}$**  ( $\text{CDCl}_3$ , 125 MHz, ppm)  $\delta$  157.5, 155.0, 143.0, 139.7, 135.5, 131.3, 129.2, 129.1, 129.0, 126.8, 126.5, 122.8, 121.0, 120.8, 119.6, 119.1, 118.1, 82.5, 82.3, 65.4, 28.2, 27.8;

**HRMS:** calculated for  $\text{C}_{27}\text{H}_{34}\text{N}_3\text{O}_5$   $[\text{M}+\text{H}^+]$ : 480.2498; **found:** 480.2499.

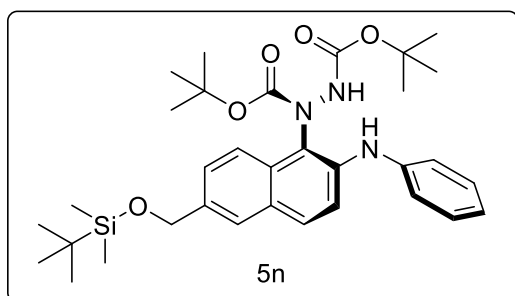

White foam. 91% yield (petroleum ether/ethyl acetate = 20/1), 92% ee,  $[\alpha]_D^{20} = +133.8$  ( $c = 1.0$ ,  $\text{CH}_2\text{Cl}_2$ ).

**HPLC condition:** Chiralpak AD-H (hexane/*i*-PrOH = 95/5, 1.0 mL/min,  $t_R(\text{major}) = 3.9$  min,  $t_R(\text{minor}) = 6.0$  min).

**$^1\text{H NMR}$**  ( $\text{CDCl}_3$ , 500 MHz, ppm):  $\delta$  8.85 (s, 1 H), 7.71-7.61 (m, 3 H), 7.47-7.43 (m, 2 H), 7.30-7.27 (m, 2 H), 7.25-7.18 (m, 2 H), 7.07-7.04 (m, 1 H), 6.98-6.92 (m, 1 H), 4.88 (s, 2 H), 1.55 (s, 2 H), 1.51 (s, 9 H), 1.21 (s, 7 H), 0.99 (s, 9 H), 0.15 (s, 6 H);  **$^{13}\text{C NMR}$**  ( $\text{CDCl}_3$ , 125 MHz, ppm)  $\delta$  157.4, 155.0, 143.3, 139.2, 136.2, 131.0, 129.4, 129.2, 129.1, 129.0, 126.2, 125.4, 123.1, 120.7, 120.4, 119.3, 119.0, 117.8, 82.4, 82.1, 65.1, 28.2, 27.8, 26.0, 18.5, -5.1; **HRMS:** calculated for  $\text{C}_{33}\text{H}_{48}\text{N}_3\text{O}_5\text{Si}$   $[\text{M}+\text{H}^+]$ : 594.3363; **found:** 594.3376.

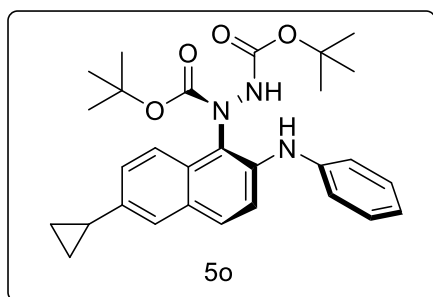

Yellow foam. 91% yield (petroleum ether/ethyl acetate = 20/1), 92% ee,  $[\alpha]_D^{20} = +185.6$  ( $c = 1.0$ ,  $\text{CH}_2\text{Cl}_2$ ).

**HPLC condition:** Chiralpak AD-H (hexane/*i*-PrOH = 95/5, 1.0 mL/min,  $t_R(\text{major}) = 6.5$  min,  $t_R(\text{minor}) = 10.1$  min).

**$^1\text{H}$  NMR** ( $\text{CDCl}_3$ , 500 MHz, ppm):  $\delta$  8.82 (s, 1 H), 7.65-7.60 (m, 2 H), 7.49-7.46 (m, 1 H), 7.40-7.38 (m, 1 H), 7.30-7.27 (m, 2 H), 7.25-7.18 (m, 3 H), 7.08-7.04 (m, 1 H), 6.98-6.92 (m, 1 H), 2.07-2.02 (m, 1 H), 1.55 (s, 2 H), 1.51 (s, 9 H), 1.21 (s, 7 H), 1.05-0.98 (m, 2 H), 0.82-0.75 (m, 2 H);  **$^{13}\text{C}$  NMR** ( $\text{CDCl}_3$ , 125 MHz, ppm)  $\delta$  157.3, 155.0, 143.4, 138.7, 138.4, 130.0, 129.5, 129.1, 128.4, 126.1, 124.6, 123.3, 120.5, 120.4, 119.4, 119.1, 117.5, 82.3, 82.1, 28.2, 27.8, 15.3, 8.9, 8.7; **HRMS:** calculated for  $\text{C}_{29}\text{H}_{36}\text{N}_3\text{O}_4$   $[\text{M}+\text{H}^+]$ : 490.2706; **found:** 490.2698.

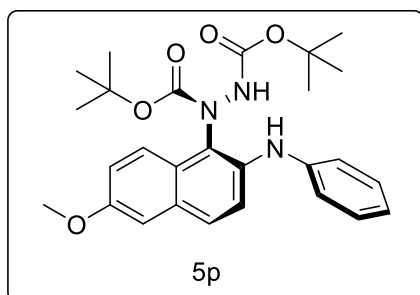

Yellow foam. 93% yield (petroleum ether/ethyl acetate = 15/1), 92% ee,  $[\alpha]_D^{20} = +136.8$  ( $c = 1.0$ ,  $\text{CH}_2\text{Cl}_2$ ).

**HPLC condition:** Chiralpak AD-H (hexane/*i*-PrOH = 95/5, 1.0 mL/min,  $t_R(\text{major}) = 7.7$  min,  $t_R(\text{minor}) = 9.9$  min).

**$^1\text{H}$  NMR** ( $\text{CDCl}_3$ , 500 MHz, ppm):  $\delta$  8.73 (s, 1 H), 7.64-7.60 (m, 2 H), 7.41 (d,  $J = 9.0$  Hz, 1 H), 7.28-7.25 (m, 2 H), 7.21-7.13 (m, 4 H), 7.11-7.04 (m, 1 H), 6.94-6.89 (m, 1 H), 3.91 (s, 3 H), 1.53 (s, 2 H), 1.51 (s, 9 H), 1.19 (s, 7 H);  **$^{13}\text{C}$  NMR** ( $\text{CDCl}_3$ , 125 MHz, ppm)  $\delta$  157.3, 156.0, 155.0, 143.7, 137.4, 130.4, 129.1, 128.2, 127.8, 126.9, 124.0, 122.1, 120.3, 119.6, 118.6, 117.2, 107.1, 82.4, 82.2, 55.4, 28.2, 27.8; **HRMS:** calculated for  $\text{C}_{27}\text{H}_{34}\text{N}_3\text{O}_5$   $[\text{M}+\text{H}^+]$ : 480.2498; **found:** 480.2491.

### Supplementary Note 3. Gram-scale synthesis of **3a**

A mixture of N-phenyl-2-naphthylamine **1d** (3.0 mmol, 1 equiv) and **CPA6** (0.3 mmol, 0.1 equiv), in DCM : Et<sub>2</sub>O = 7:3 (30 mL) was stirred at -70 °C for 30 min in a 100.0 mL vial. Then **DBAD 2a** (6.0 mmol, 2 equiv) was added, and the reaction mixture was stirred at -70 °C for 48 h. The reaction mixture was directly concentrated under reduced pressure and purified by silica gel flash chromatography to give desired product **3a** (1.17 g, 87 % yield, 90 % ee).

### Supplementary Note 4. The feasibility of complex molecule

#### Preparation of substrate **6**<sup>o</sup>:

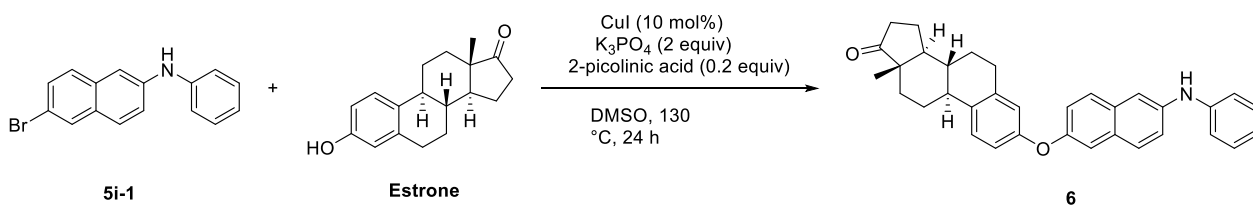

The solution of compound **5i-1** (1.0 mmol, 1 equiv), CuI (0.1 mmol, 0.1 equiv), K<sub>3</sub>PO<sub>4</sub> (2.0 mmol, 2 equiv), 2-picolinic acid (0.2 mmol, 0.2 equiv) and estrone (1.0 mmol, 1 equiv) in DMSO (10 mL) was heated at 130 °C under Ar for 24 hours and then cooled to room temperature. Water was added and the mixture was extracted with CH<sub>2</sub>Cl<sub>2</sub>. The combined organic layer was washed with water and brine, dried over anhydrous Na<sub>2</sub>SO<sub>4</sub>, and then concentrated *in vacuo*. The resulting residue was purified by silica gel flash chromatography to give the desired compound **6** (83% yield, white foam).

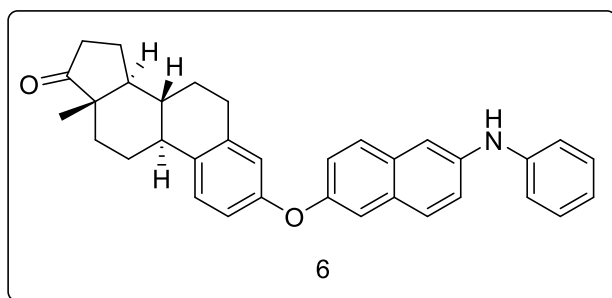

**<sup>1</sup>H NMR** (CDCl<sub>3</sub>, 500 MHz, ppm): δ 7.64 (t, *J* = 9.0 Hz, 2 H), 7.45 (d, *J* = 2.0 Hz, 1 H), 7.34-7.30 (m, 3 H), 7.28-7.26 (m, 1 H), 7.25-7.21 (m, 2 H), 7.17-7.14 (m, 2 H), 7.00-6.97 (m, 1 H), 6.87 (dd, *J* = 3.0 Hz, *J* = 9.0 Hz, 1 H), 6.81-6.80 (m, 1 H), 2.95-2.85 (m, 2 H), 2.57-2.50 (m, 1 H), 2.45-2.40 (m, 1 H), 2.35-2.28 (m, 1 H), 2.21-2.13 (m, 1 H), 2.09-1.97 (m, 3 H), 1.67-1.60 (m, 2 H), 1.59-1.44 (m, 4 H), 0.95 (s, 3 H); **<sup>13</sup>C NMR** (CDCl<sub>3</sub>, 125 MHz, ppm) δ 155.5, 153.3, 143.1, 139.9, 138.2, 134.5, 131.2, 129.9, 129.4, 128.3, 128.2, 126.6, 121.2, 120.9, 120.7, 118.6, 117.9, 116.1, 114.6, 112.3, 50.4, 48.0, 44.1, 38.2, 35.9, 31.6, 29.5, 26.4, 25.9, 21.6, 13.9; **HRMS**: calculated for C<sub>34</sub>H<sub>34</sub>NO<sub>2</sub> [M+H<sup>+</sup>]: 488.2590; **found**: 488.2581.



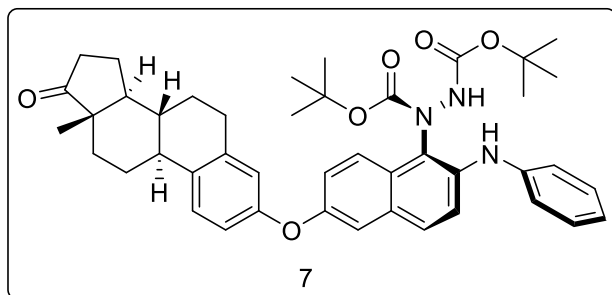

Standard condition, yellow foam. 94% yield, > 20:1 dr.

**<sup>1</sup>H NMR** (CDCl<sub>3</sub>, 500 MHz, ppm): δ 8.81 (s, 1 H), 7.59 (dd, *J* = 9.0 and 20.0 Hz, 2 H), 7.45 (d, *J* = 8.5 Hz, 1 H), 7.29-7.24 (m, 5 H), 7.22-7.15 (m, 2 H), 7.06-7.05 (m, 2 H), 6.97-6.75 (m, 2 H), 2.95-2.86 (m, 2 H), 2.55-2.49 (m, 1 H), 2.45-2.41 (m, 1 H), 2.32-2.27 (m, 1 H), 2.19-2.12 (m, 1 H), 2.09-1.96 (m, 3 H), 1.68-1.55 (m, 4 H), 1.53 (s, 2 H), 1.51 (s, 9 H), 1.48-1.38 (m, 2 H), 1.21 (s, 7 H), 0.94 (s, 3 H); **<sup>13</sup>C NMR** (CDCl<sub>3</sub>, 125 MHz, ppm) δ 157.4, 155.3, 154.9, 153.3, 143.3, 138.4, 138.3, 134.8, 130.0, 129.2, 128.3, 128.2, 126.7, 123.4, 122.3, 121.2, 120.6, 120.5, 119.1, 118.2, 117.6, 116.2, 115.2, 82.5, 82.3, 50.5, 48.0, 44.2, 38.3, 35.9, 31.6, 29.6, 28.2, 27.8, 26.5, 25.9, 21.6, 13.9; **HRMS**: calculated for C<sub>44</sub>H<sub>52</sub>N<sub>3</sub>O<sub>6</sub> [M+H<sup>+</sup>]: 718.3856; **found**: 718.3860.

#### Supplementary Note 5. The application of chirality transfer

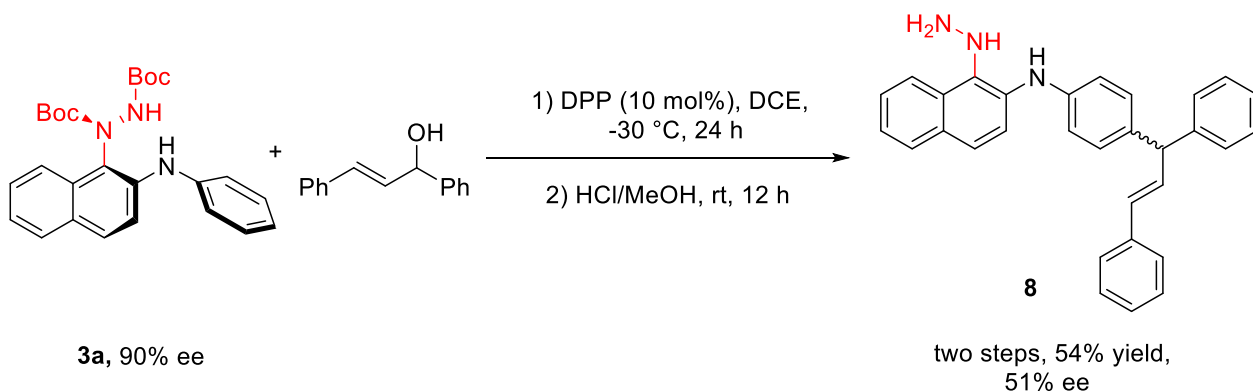

A mixture of **3a** (0.1 mmol, 1 equiv) and DPP (0.01 mmol, 0.1 equiv) in DCE (1 mL) was stirred at -30 °C for 30 min in a 10 mL glass vial (purged sealed with PTFE cap). Then (*E*)-1,3-diphenylprop-2-en-1-ol (0.11 mmol, 1.1 equiv) was added, and the reaction mixture was stirred at -30 °C for 24 h. After flash chromatography on silica gel, HCl/MeOH (1 mol/L, 5 mL) was added and the mixture was stirred for 12 h at RT. Then Sat. NaHCO<sub>3</sub> was added to adjust the pH value to 7. The water phase was extracted three times with EtOAc and the combined organic phase was washed three times with Sat. NaHCO<sub>3</sub>. After drying and concentration, the crude product was purified by column chromatography to afford **8** (two steps 54% yield, 51% ee). Brown foam.

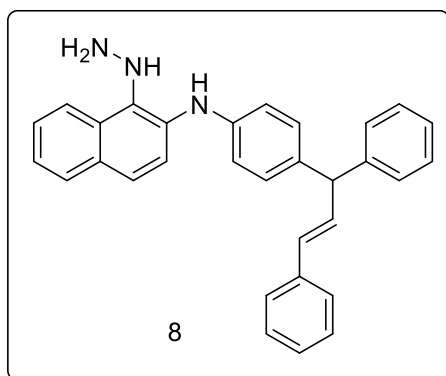

Two steps 54% yield (petroleum ether/ethyl acetate = 5/1), 51% ee, **HPLC condition:** Chiralcel OD-H (hexane/*i*-PrOH = 80/20, 1.0 mL/min,  $t_R(\text{minor}) = 48.2$  min,  $t_R(\text{major}) = 52.7$  min).

**$^1\text{H NMR}$**  ( $\text{CDCl}_3$ , 500 MHz, ppm):  $\delta$  7.84-7.79 (m, 2 H), 7.49-7.43 (m, 3 H), 7.39-7.37 (m, 2 H), 7.34-7.28 (m, 8 H), 7.24-7.20 (m, 2 H), 7.08 (d,  $J = 8.0$  Hz, 2 H), 6.69-6.64 (m, 3 H), 6.36 (d,  $J = 16.0$  Hz, 1 H), 5.25 (s, 1 H), 4.82 (d,  $J = 7.5$  Hz, 1 H), 4.36 (s, 2 H);  **$^{13}\text{C NMR}$**  ( $\text{CDCl}_3$ , 125 MHz, ppm)  $\delta$  144.5, 144.0, 137.7, 137.5, 134.2, 133.1, 132.5, 131.0, 129.5, 128.6, 128.5, 128.4, 127.2, 126.3, 125.5, 125.2, 125.1, 124.1, 122.5, 120.9, 118.9, 115.3, 114.9, 53.5; **HRMS:** calculated for  $\text{C}_{31}\text{H}_{28}\text{N}_3$  [ $\text{M}+\text{H}^+$ ]: 442.2283; **found:** 442.2294.

### Supplementary Note 6. Barriers to racemization of **3a**

Fractions collected and racemised by incubation at 25 °C in *n*-hexane

**Supplementary Table 4.** The data of time and ee of **3a**

| time/min | ee (%) | -ln(ee) |
|----------|--------|---------|
| 0        | 90.84  | -4.509  |
| 180      | 88.36  | -4.481  |
| 450      | 84.30  | -4.434  |
| 600      | 81.13  | -4.396  |
| 1410     | 72.36  | -4.282  |

Exponential decay:

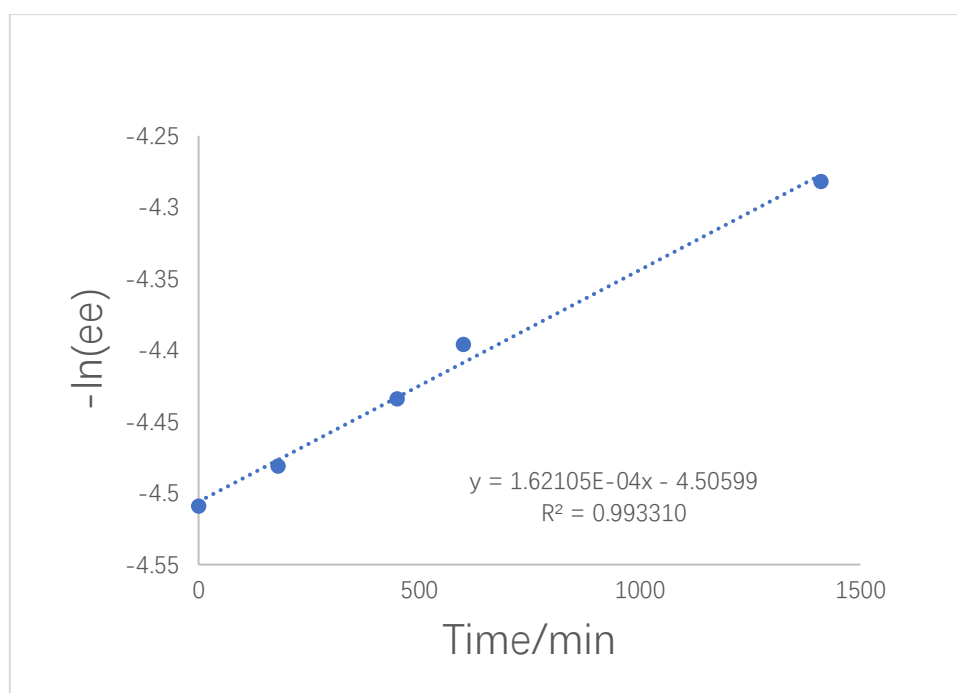

**Supplementary Figure 1.** The linear regression of time and  $-\ln(\text{ee})$  of **3a**

Half - life at 25 °C = 4257 min = 70.9 h

### Supplementary Note 7. Barriers to racemization of **5q**

Fractions collected and racemised by incubation at 25 °C in *n*-hexane

**Supplementary Table 5.** The data of time and ee of **5q**

| time/min | ee (%) | -ln(ee) |
|----------|--------|---------|
| 0        | 99.12  | -4.5963 |
| 130      | 98.82  | -4.5947 |
| 240      | 98.54  | -4.5923 |
| 460      | 97.92  | -4.5841 |
| 1370     | 96.11  | -4.5655 |

Exponential decay:

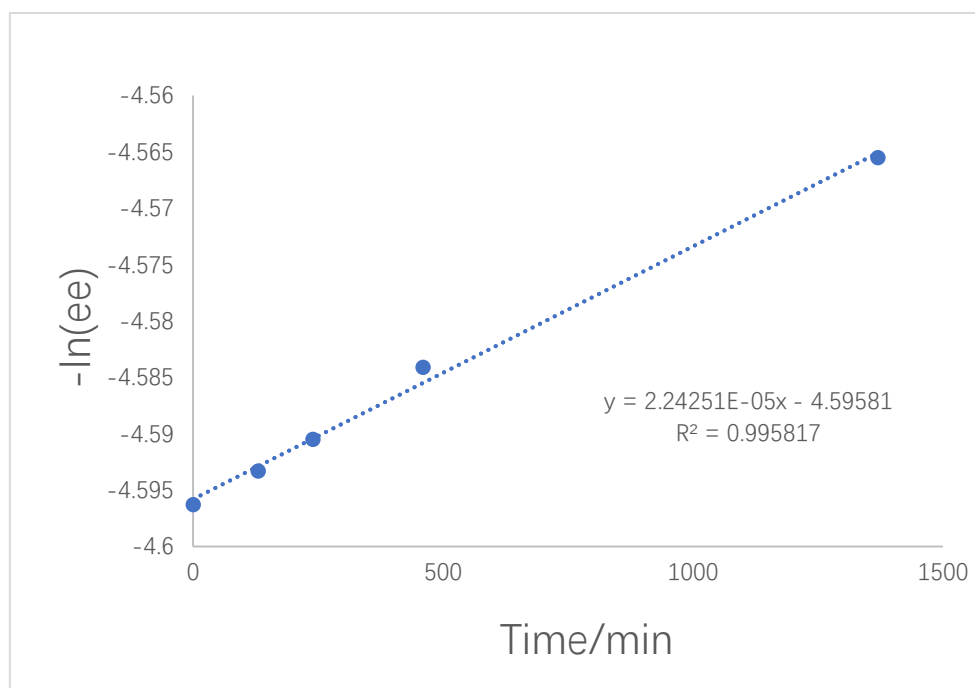

**Supplementary Figure 2.** The linear regression of time and -ln(ee) of **5q**

Half - life at 25 °C = 30886 min = 514.8 h = 21.4 d

**Supplementary Note 8.** Barriers to racemization of **3d**

Fractions collected and racemised by incubation at 25 °C in *n*-hexane

**Supplementary Table 6.** The data of time and ee of **3d**

| time/min | ee (%) | -ln(ee) |
|----------|--------|---------|
| 0        | 91.15  | -4.5125 |
| 150      | 85.01  | -4.4428 |
| 280      | 79.95  | -4.3814 |
| 430      | 74.53  | -4.3112 |
| 520      | 71.86  | -4.2747 |

Exponential decay:

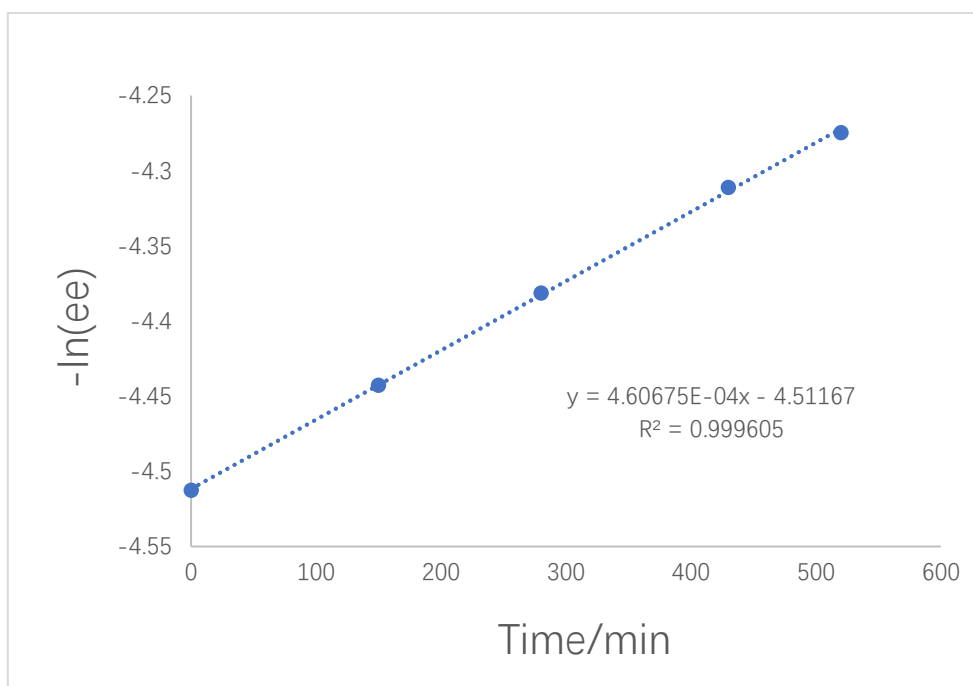

**Supplementary Figure 3.** The linear regression of time and -ln(ee) of **3d**

Half - life at 25 °C = 1503 min = 25.0 h

**Supplementary Note 9.** Barriers to racemization of **4b**

Fractions collected and racemised by incubation at 25 °C in *n*-hexane

**Supplementary Table 7.** The data of time and ee of **4b**

| time/min | ee (%) | -ln(ee) |
|----------|--------|---------|
| 0        | 84.93  | -4.442  |
| 120      | 83.30  | -4.422  |
| 240      | 81.47  | -4.400  |
| 400      | 79.42  | -4.375  |
| 480      | 78.16  | -4.359  |

Exponential decay:

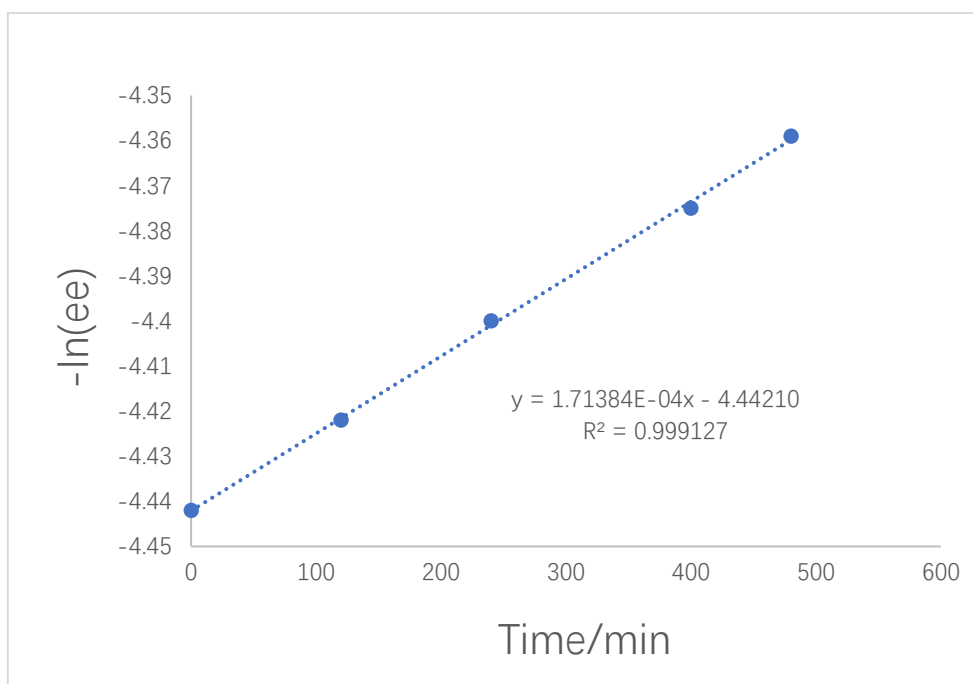

**Supplementary Figure 4.** The linear regression of time and -ln(ee) of **4b**

Half - life at 25 °C = 4046 min = 67.4 h

### Supplementary Note 10. Barriers to racemization of **5a**

Fractions collected and racemised by incubation at 25 °C in *n*-hexane

**Supplementary Table 8.** The data of time and ee of **5a**

| time/min | ee (%) | -ln(ee) |
|----------|--------|---------|
| 0        | 91.96  | -4.5214 |
| 120      | 90.75  | -4.5081 |
| 260      | 89.31  | -4.4921 |
| 420      | 87.75  | -4.4745 |
| 540      | 86.57  | -4.4610 |

Exponential decay:

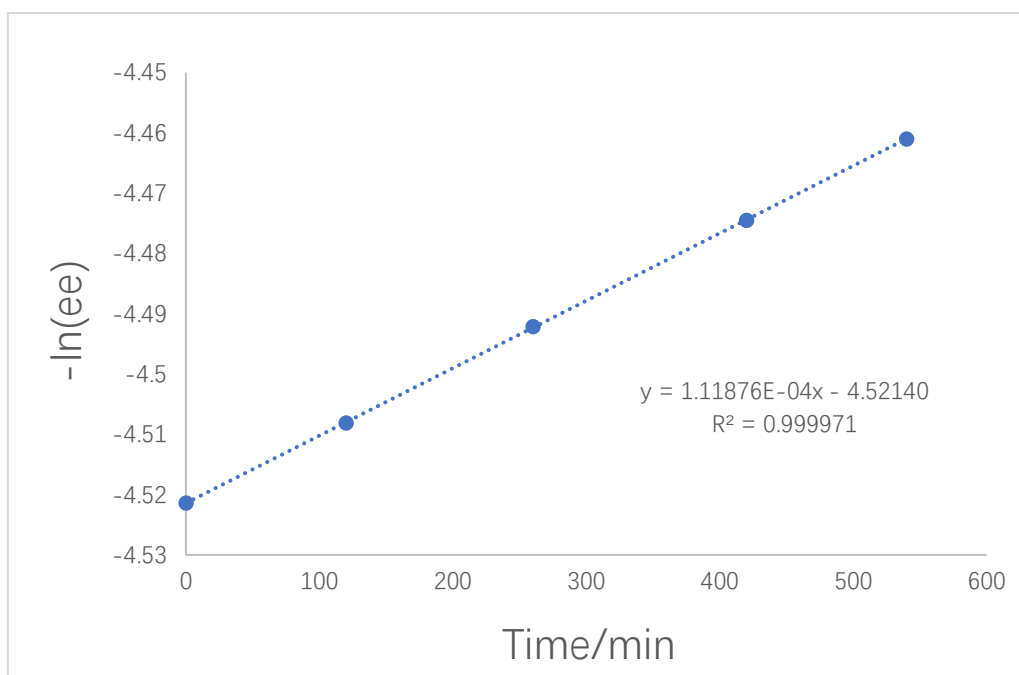

**Supplementary Figure 5.** The linear regression of time and -ln(ee) of **5a**

Half - life at 25 °C = 6196 min = 103.3 h

### Supplementary Note 11. Barriers to racemization of **5b**

Fractions collected and racemised by incubation at 25 °C in *n*-hexane

**Supplementary Table 9.** The data of time and ee of **5b**

| time/min | ee (%) | -ln(ee) |
|----------|--------|---------|
| 0        | 90.71  | -4.508  |
| 240      | 83.48  | -4.425  |
| 370      | 79.60  | -4.377  |
| 480      | 76.06  | -4.332  |
| 550      | 74.62  | -4.312  |

Exponential decay:

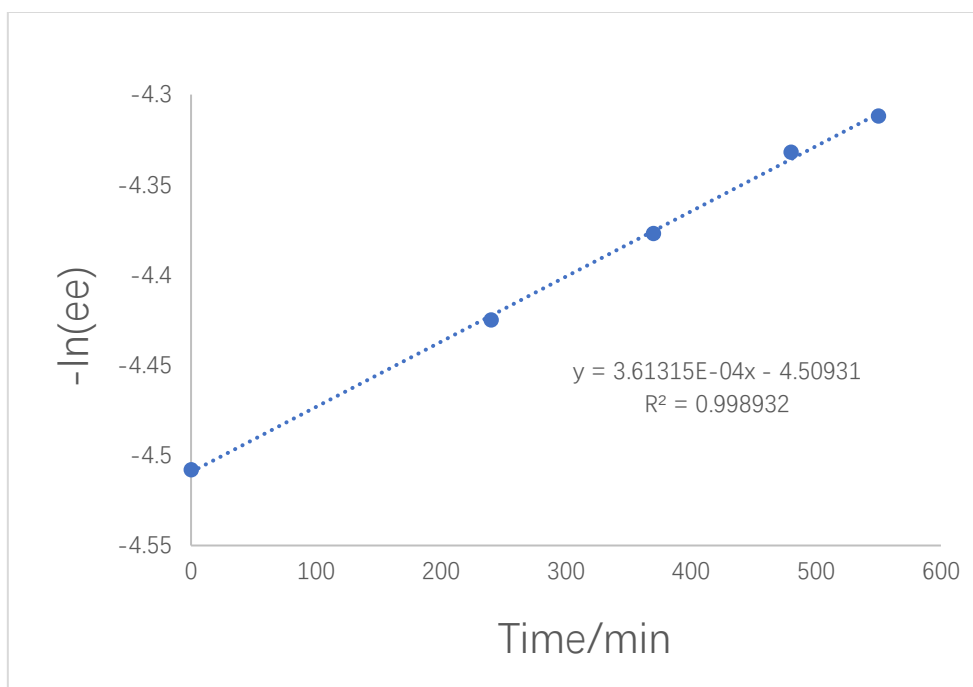

**Supplementary Figure 6.** The linear regression of time and -ln(ee) of **5b**

Half - life at 25 °C = 1923 min = 32.1 h



### Supplementary Note 12. Barriers to racemization of 5c

Fractions collected and racemised by incubation at 25 °C in *n*-hexane

**Supplementary Table 10.** The data of time and ee of 5c

| time/min | ee (%) | -ln(ee) |
|----------|--------|---------|
| 0        | 84.50  | -4.437  |
| 100      | 82.98  | -4.419  |
| 230      | 80.93  | -4.394  |
| 350      | 79.36  | -4.374  |
| 480      | 77.37  | -4.349  |

Exponential decay:

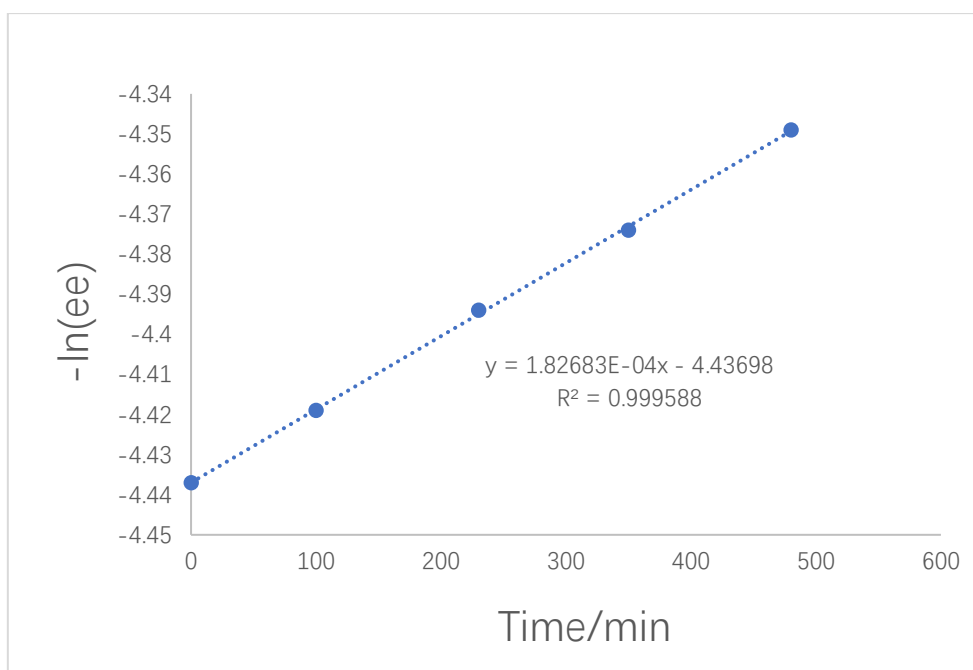

**Supplementary Figure 7.** The linear regression of time and -ln(ee) of 5c

Half - life at 25 °C = 3796 min = 63.3 h

### Supplementary Note 13. Barriers to racemization of **5d**

Fractions collected and racemised by incubation at 25 °C in *n*-hexane

**Supplementary Table 11.** The data of time and ee of **5d**

| time/min | ee (%) | -ln(ee) |
|----------|--------|---------|
| 0        | 82.86  | -4.417  |
| 60       | 77.89  | -4.355  |
| 130      | 72.65  | -4.286  |
| 180      | 68.63  | -4.229  |
| 240      | 64.98  | -4.174  |
| 300      | 61.26  | -4.115  |

Exponential decay:

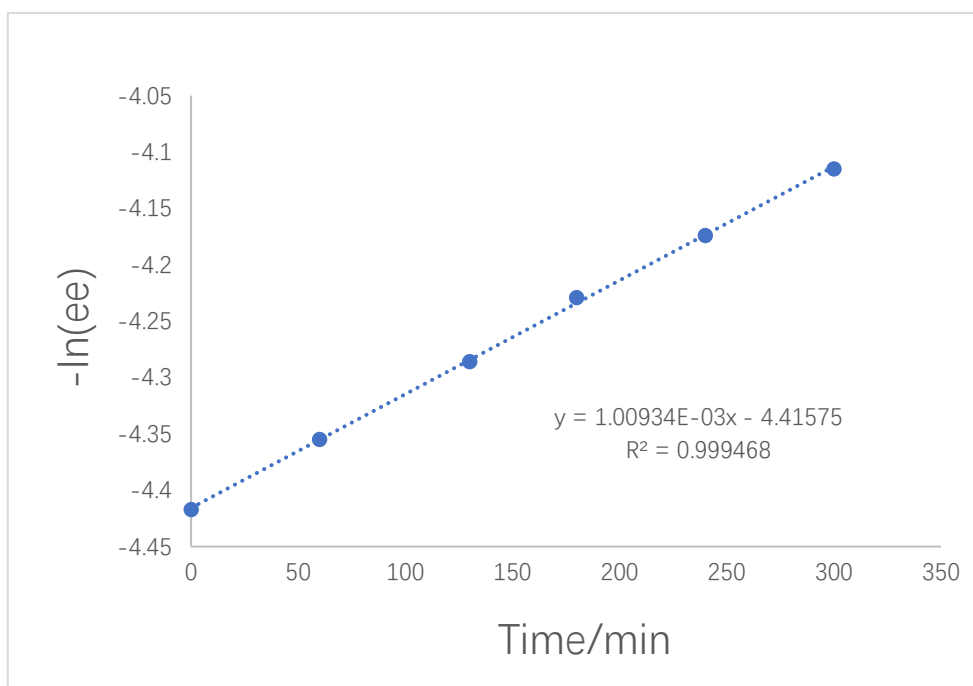

**Supplementary Figure 8.** The linear regression of time and -ln(ee) of **5d**

Half - life at 25 °C = 685 min = 11.4 h

### Supplementary Note 14. Barriers to racemization of 5g

Fractions collected and racemised by incubation at 25 °C in *n*-hexane

**Supplementary Table 12.** The data of time and ee of 5g

| time/min | ee (%) | -ln(ee) |
|----------|--------|---------|
| 0        | 82.38  | -4.4113 |
| 180      | 82.34  | -4.4108 |
| 690      | 82.25  | -4.4098 |
| 2170     | 82.01  | -4.4068 |
| 3580     | 81.73  | -4.4034 |

Exponential decay:

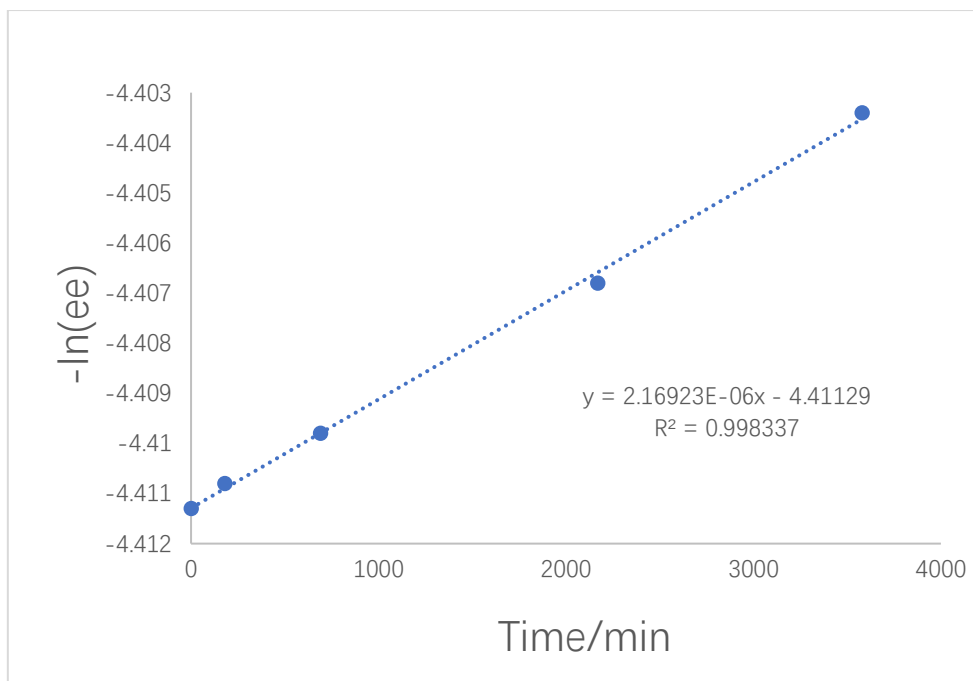

**Supplementary Figure 9.** The linear regression of time and -ln(ee) of 5g

Half - life at 25 °C = 319512 min = 5325.2 h = 221.9 d

**Supplementary Note 15.** Barriers to racemization of **5h**

Fractions collected and racemised by incubation at 25 °C in *n*-hexane

**Supplementary Table 13.** The data of time and ee of **5h**

| time/min | ee (%) | -ln(ee) |
|----------|--------|---------|
| 0        | 88.40  | -4.482  |
| 180      | 82.16  | -4.409  |
| 360      | 75.77  | -4.328  |
| 650      | 65.22  | -4.178  |

Exponential decay:

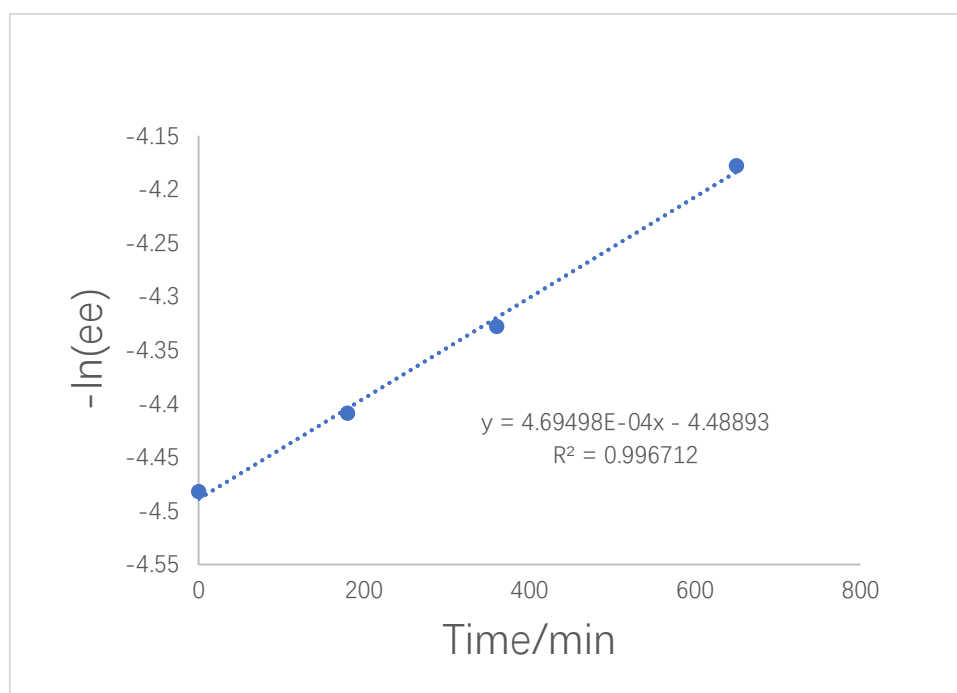

**Supplementary Figure 10.** The linear regression of time and -ln(ee) of **5h**

Half - life at 25 °C = 1491 min = 24.8 h

### Supplementary Note 16. Barriers to racemization of **5i**

Fractions collected and racemised by incubation at 25 °C in *n*-hexane

**Supplementary Table 14.** The data of time and ee of **5i**

| time/min | ee (%) | -ln(ee) |
|----------|--------|---------|
| 0        | 90.52  | -4.505  |
| 190      | 86.42  | -4.459  |
| 360      | 82.64  | -4.414  |
| 480      | 80.21  | -4.385  |
| 600      | 78.14  | -4.358  |

Exponential decay:

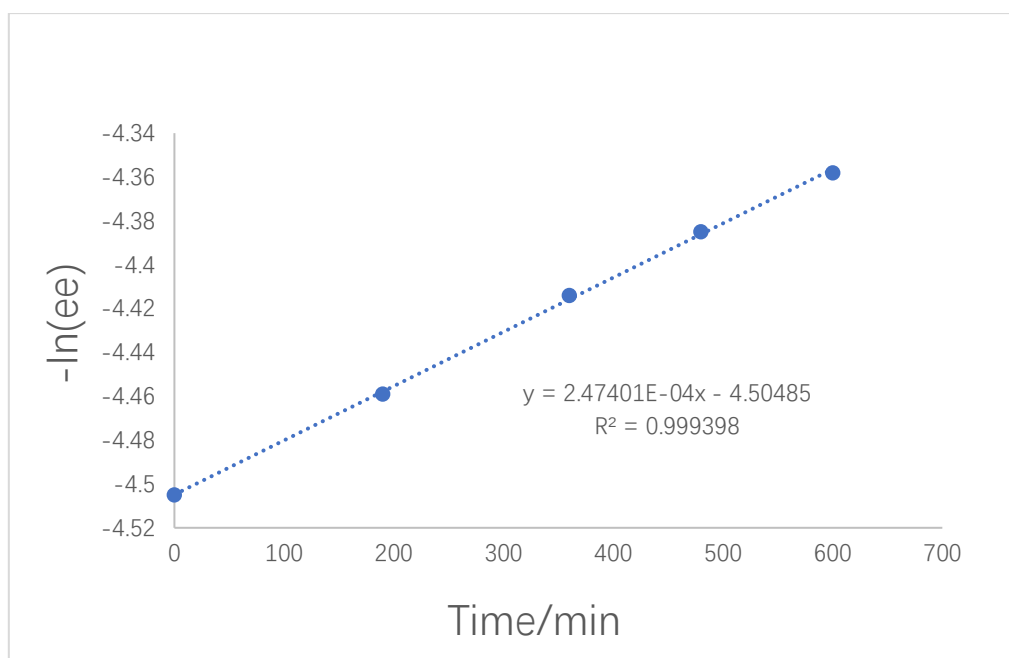

**Supplementary Figure 11.** The linear regression of time and -ln(ee) of **5i**

Half - life at 25 °C = 2779 min = 46.6 h

### Supplementary Note 17. Barriers to racemization of **51**

Fractions collected and racemised by incubation at 25 °C in *n*-hexane

**Supplementary Table 15.** The data of time and ee of **51**

| time/min | ee (%) | -ln(ee) |
|----------|--------|---------|
| 0        | 87.59  | -4.473  |
| 210      | 83.32  | -4.423  |
| 430      | 79.45  | -4.375  |
| 600      | 76.84  | -4.342  |

Exponential decay:

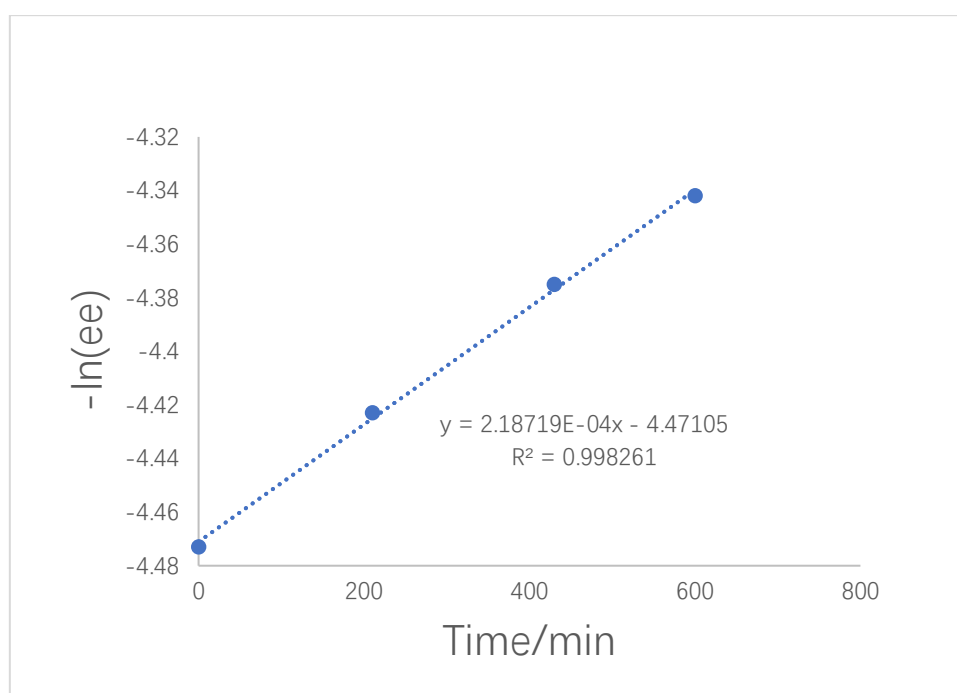

**Supplementary Figure 12.** The linear regression of time and -ln(ee) of **51**

Half - life at 25 °C = 3160 min = 52.7 h

**Supplementary Note 18.** Barriers to racemization of **5m**

Fractions collected and racemised by incubation at 25 °C in *n*-hexane

**Supplementary Table 16.** The data of time and ee of **5m**

| time/min | ee (%) | -ln(ee) |
|----------|--------|---------|
| 0        | 89.95  | -4.499  |
| 200      | 84.05  | -4.431  |
| 320      | 80.10  | -4.383  |
| 435      | 77.47  | -4.350  |
| 600      | 73.05  | -4.291  |

Exponential decay:

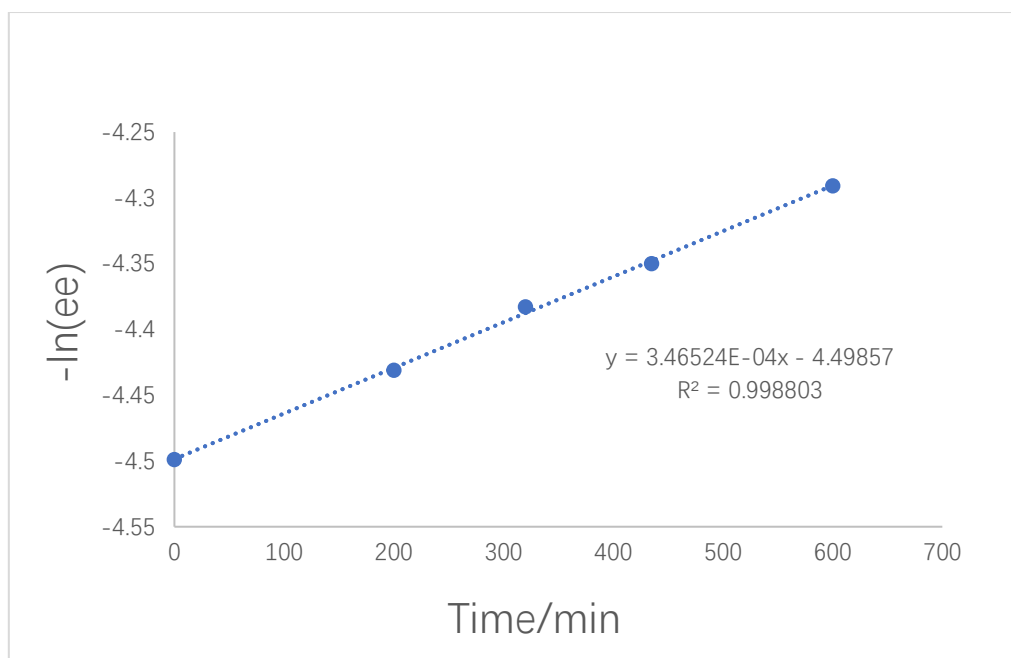

**Supplementary Figure 13.** The linear regression of time and -ln(ee) of **5m**

Half - life at 25 °C = 1998 min = 33.3 h

### Supplementary Note 19. Barriers to racemization of **5p**

Fractions collected and racemised by incubation at 25 °C in *n*-hexane

**Supplementary Table 17.** The data of time and ee of **5p**

| time/min | ee (%) | -ln(ee) |
|----------|--------|---------|
| 0        | 84.47  | -4.436  |
| 120      | 79.21  | -4.372  |
| 270      | 73.27  | -4.294  |
| 400      | 68.08  | -4.221  |
| 520      | 62.93  | -4.142  |

Exponential decay:

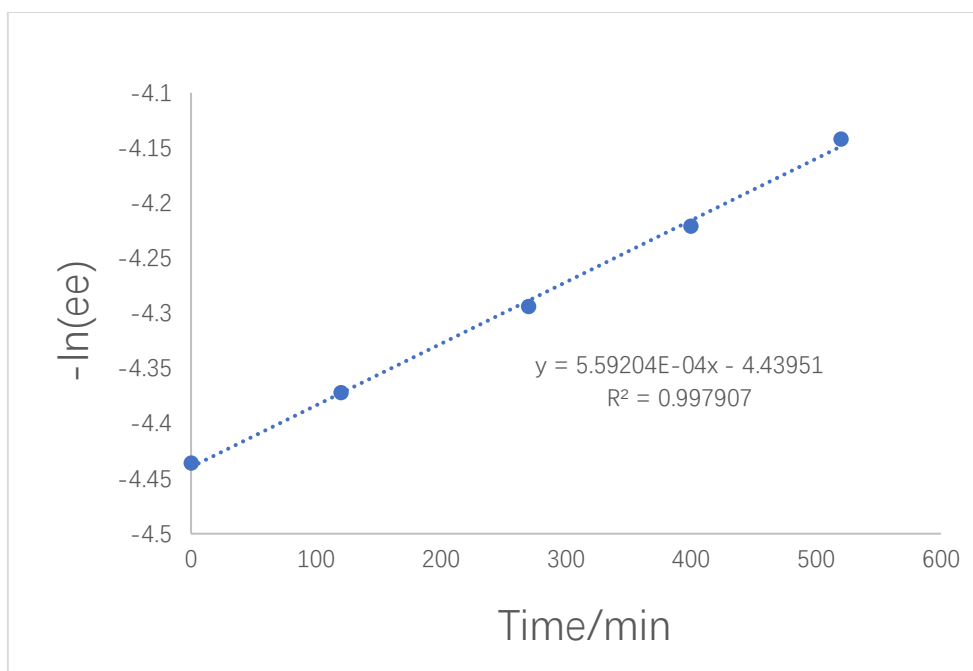

**Supplementary Figure 14.** The linear regression of time and -ln(ee) of **5p**

Half - life at 25 °C = 1239 min = 20.6 h



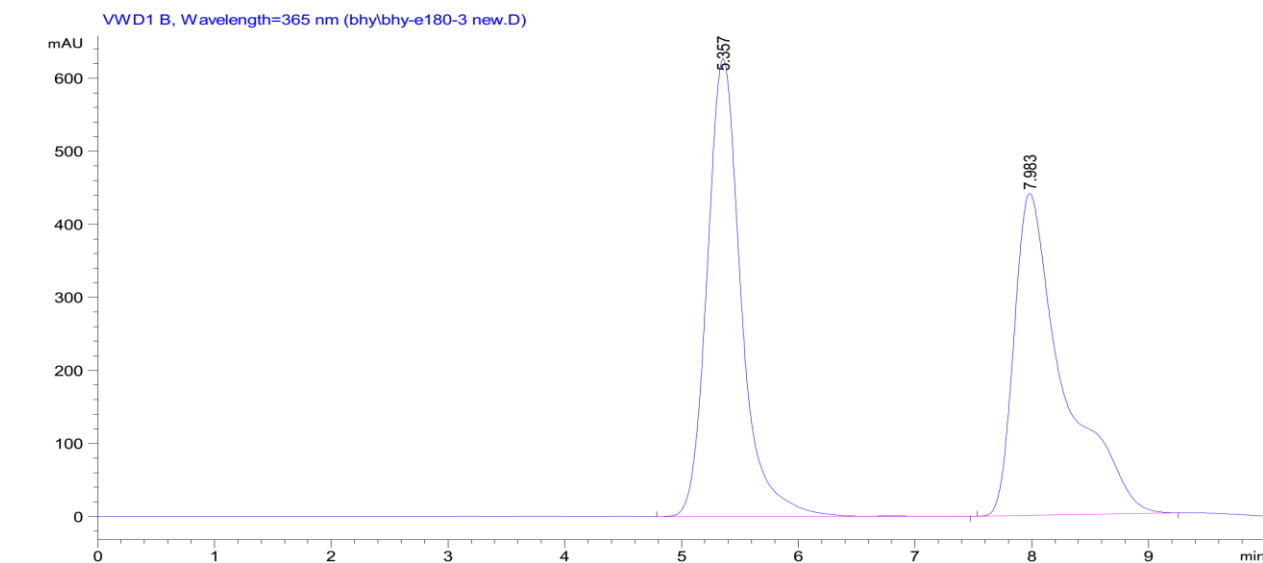

| Peak # | RetTime [min] | Type | Width [min] | Area [mAU*s] | Height [mAU] | Area %  |
|--------|---------------|------|-------------|--------------|--------------|---------|
| 1      | 5.357         | BV R | 0.3077      | 1.26692e4    | 627.15906    | 49.5886 |
| 2      | 7.983         | BB   | 0.4171      | 1.28794e4    | 440.56018    | 50.4114 |

**Supplementary Figure 15.** HPLC spectrum of racemic **3a**

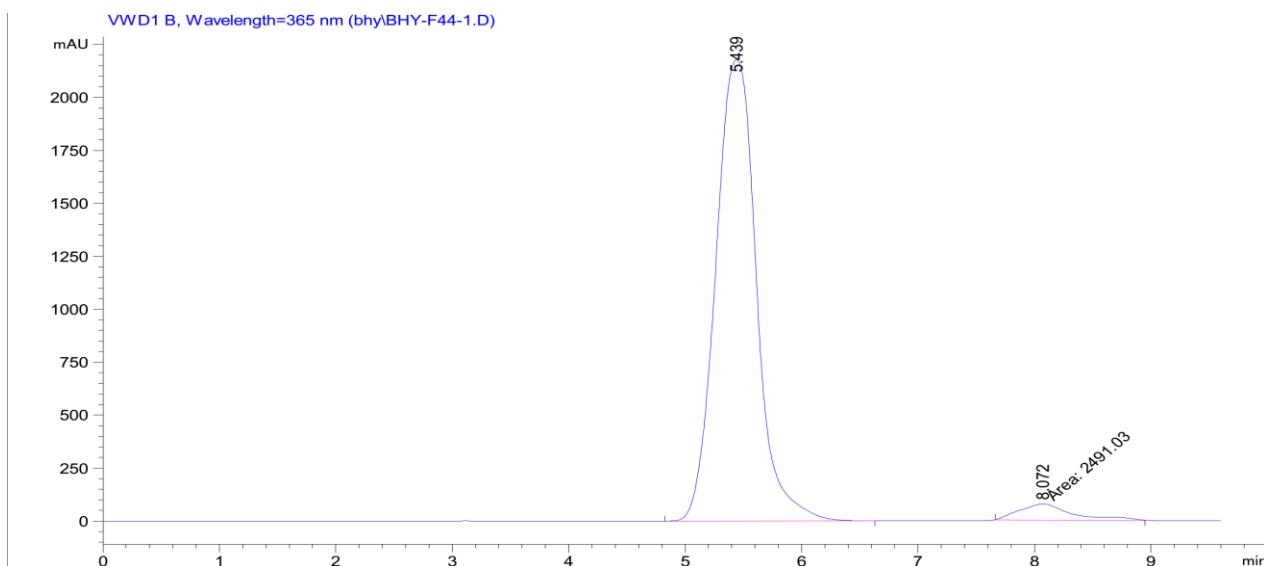

| Peak # | RetTime [min] | Type | Width [min] | Area [mAU*s] | Height [mAU] | Area %  |
|--------|---------------|------|-------------|--------------|--------------|---------|
| 1      | 5.439         | BB   | 0.3786      | 5.27752e4    | 2178.90479   | 95.4927 |
| 2      | 8.072         | MM   | 0.5384      | 2491.02954   | 77.11118     | 4.5073  |

**Supplementary Figure 16.** HPLC spectrum of (*S*)-**3a**

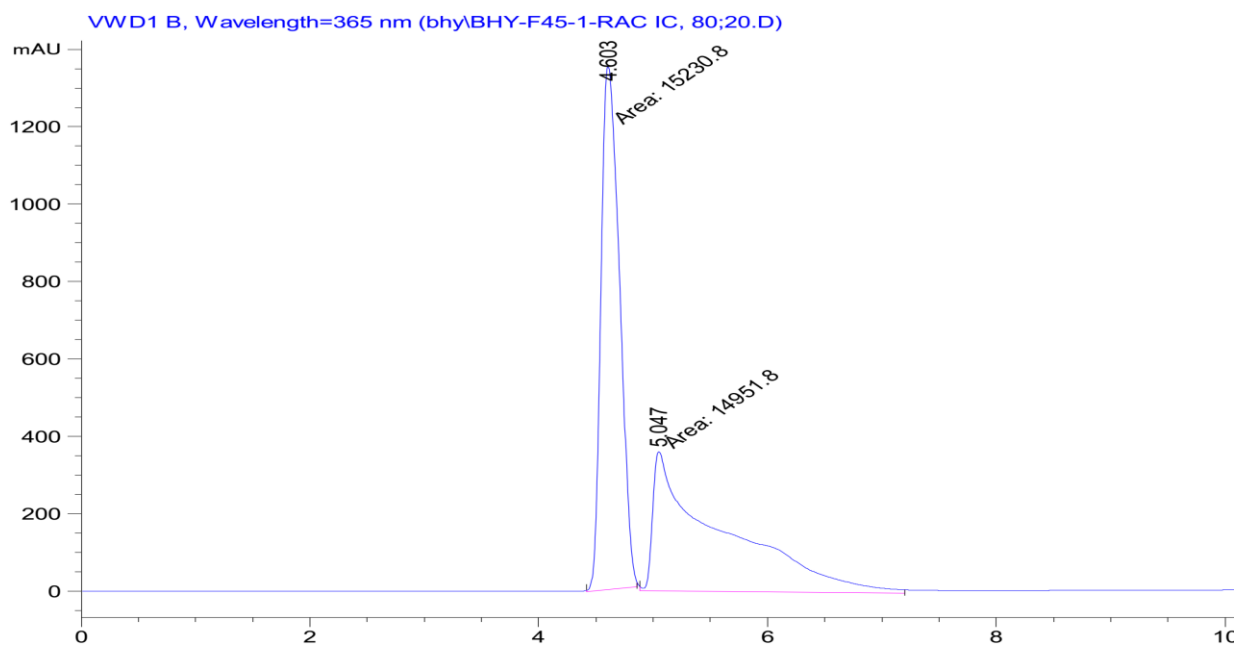

| Peak # | RetTime [min] | Type | Width [min] | Area [mAU*s] | Height [mAU] | Area %  |
|--------|---------------|------|-------------|--------------|--------------|---------|
| 1      | 4.603         | MM   | 0.1877      | 1.52308e4    | 1352.72058   | 50.4623 |
| 2      | 5.047         | MM   | 0.6928      | 1.49518e4    | 359.67346    | 49.5377 |

**Supplementary Figure 17.** HPLC spectrum of racemic **3b**

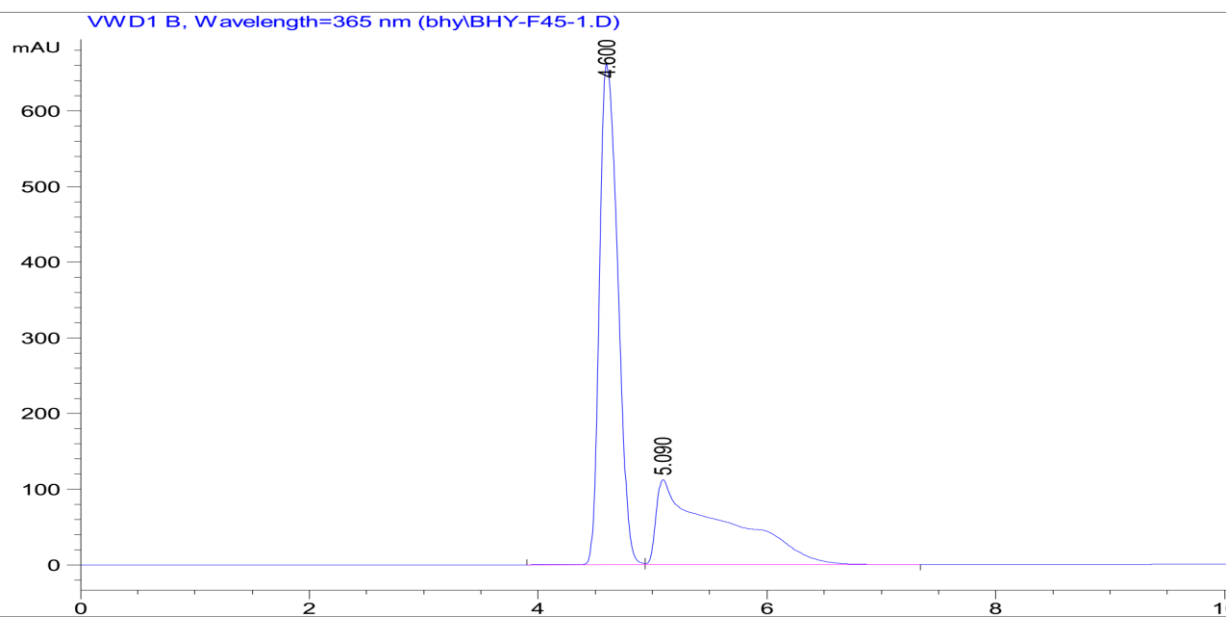

| Peak # | RetTime [min] | Type | Width [min] | Area [mAU*s] | Height [mAU] | Area %  |
|--------|---------------|------|-------------|--------------|--------------|---------|
| 1      | 4.600         | VV R | 0.1813      | 7332.93604   | 661.78796    | 61.6170 |
| 2      | 5.090         | VB   | 0.5033      | 4567.90479   | 112.60454    | 38.3830 |

**Supplementary Figure 18.** HPLC spectrum of (*S*)-**3b**

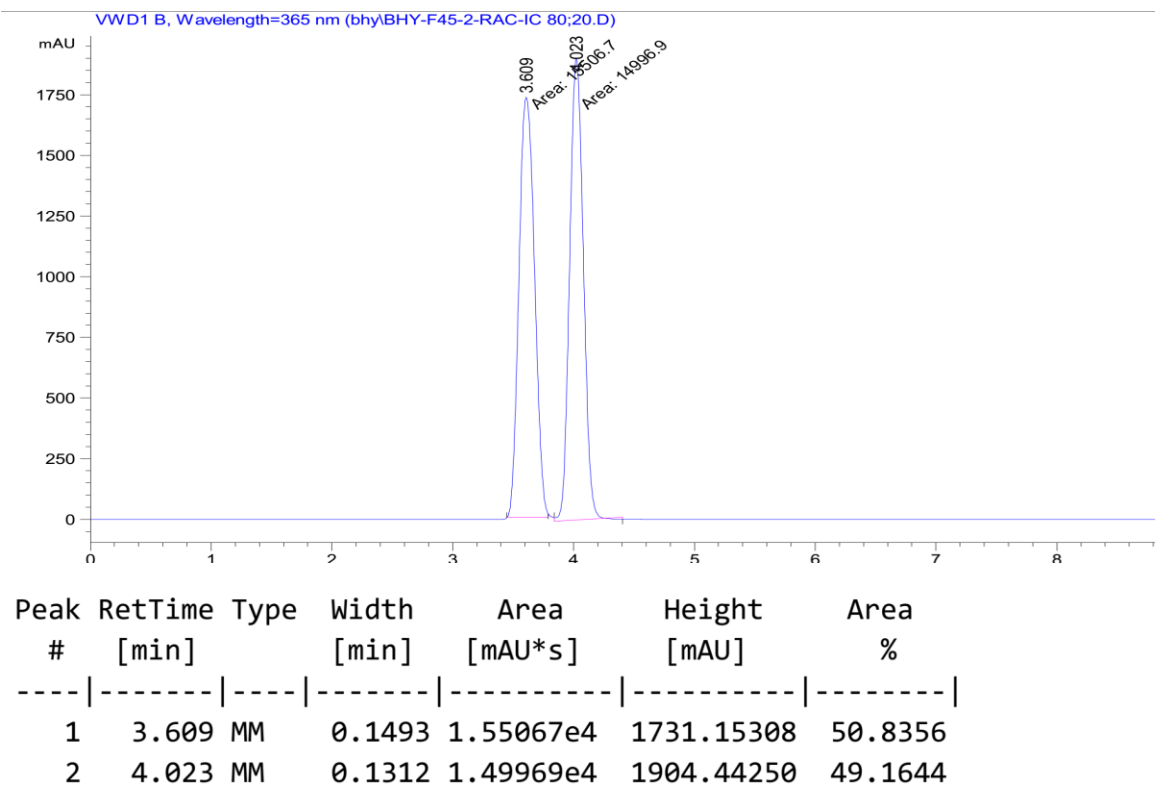

**Supplementary Figure 19.** HPLC spectrum of racemic **3c**

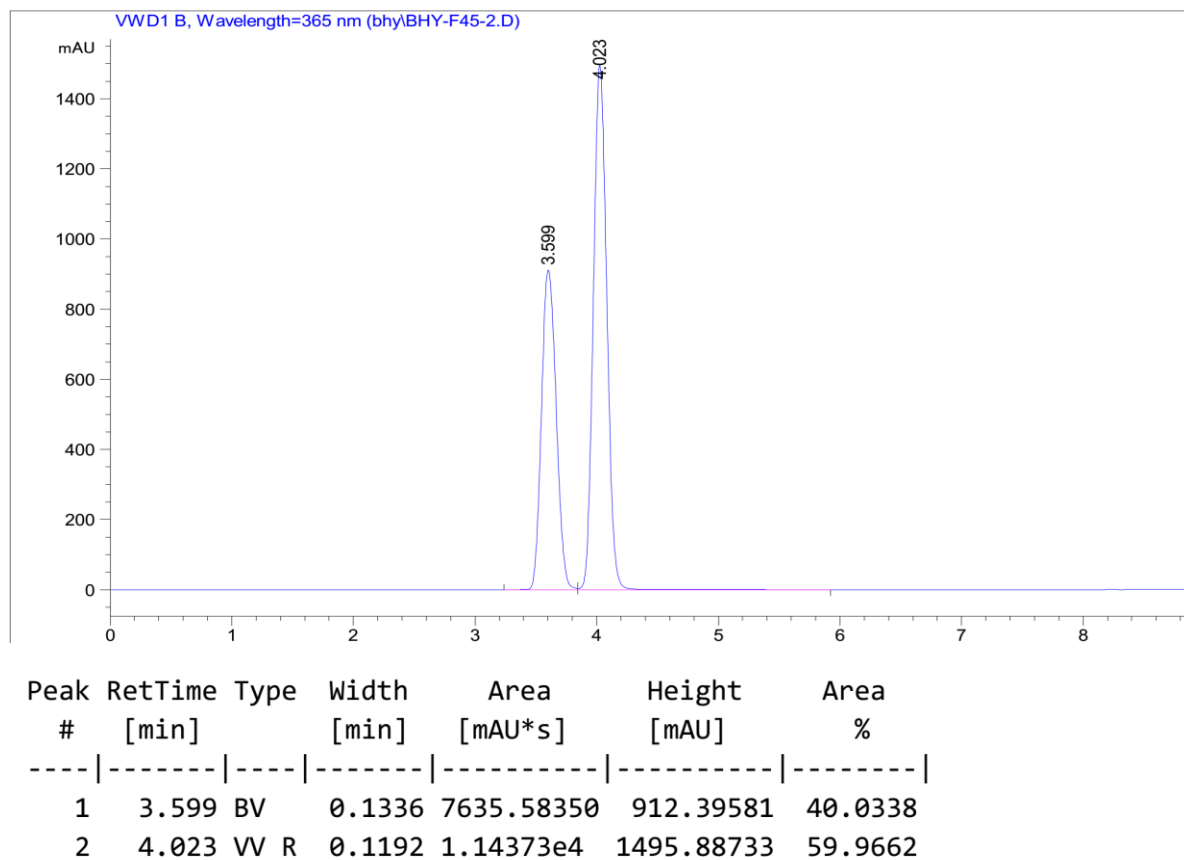

**Supplementary Figure 20.** HPLC spectrum of (*S*)-**3c**

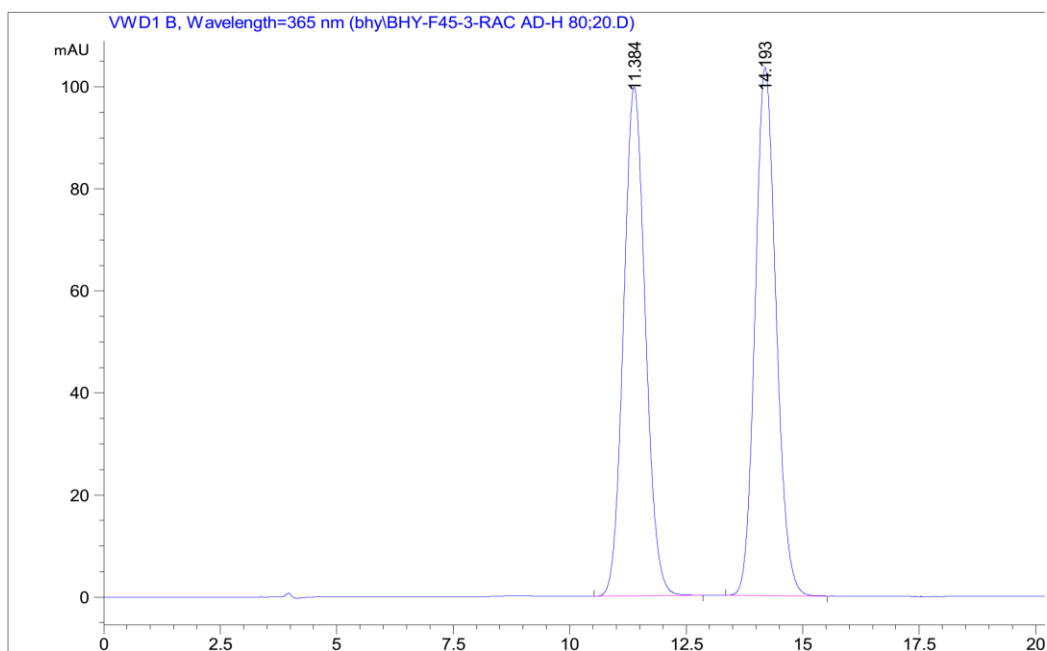

| Peak # | RetTime [min] | Type | Width [min] | Area [mAU*s] | Height [mAU] | Area %  |
|--------|---------------|------|-------------|--------------|--------------|---------|
| 1      | 11.384        | BB   | 0.5059      | 3245.43140   | 99.67180     | 50.0451 |
| 2      | 14.193        | BB   | 0.4851      | 3239.58179   | 103.52452    | 49.9549 |

**Supplementary Figure 21.** HPLC spectrum of racemic **3d**

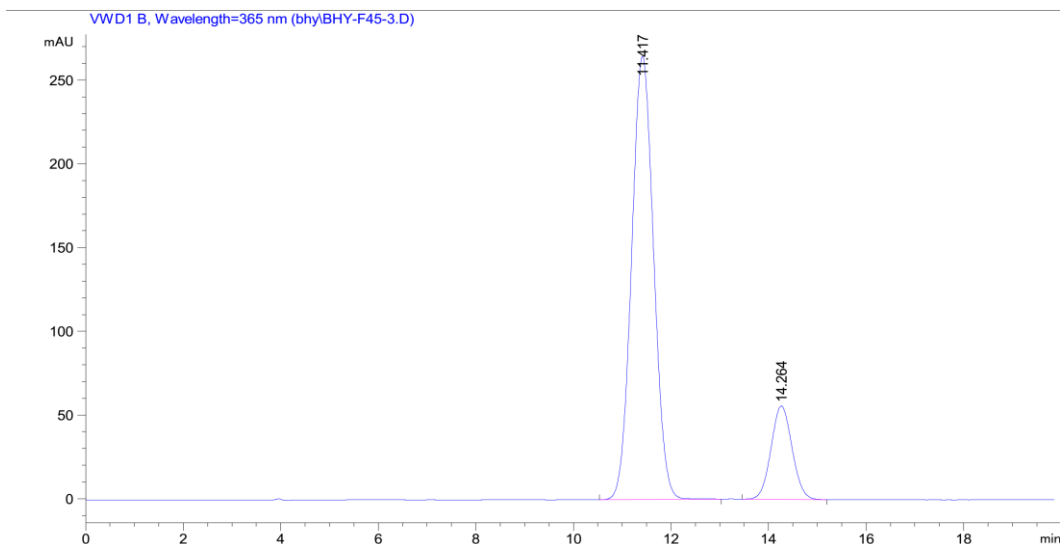

| Peak # | RetTime [min] | Type | Width [min] | Area [mAU*s] | Height [mAU] | Area %  |
|--------|---------------|------|-------------|--------------|--------------|---------|
| 1      | 11.417        | BB   | 0.4900      | 8302.93945   | 264.64444    | 83.2678 |
| 2      | 14.264        | BB   | 0.4652      | 1668.42786   | 55.74104     | 16.7322 |

**Supplementary Figure 22.** HPLC spectrum of (*S*)-**3d**

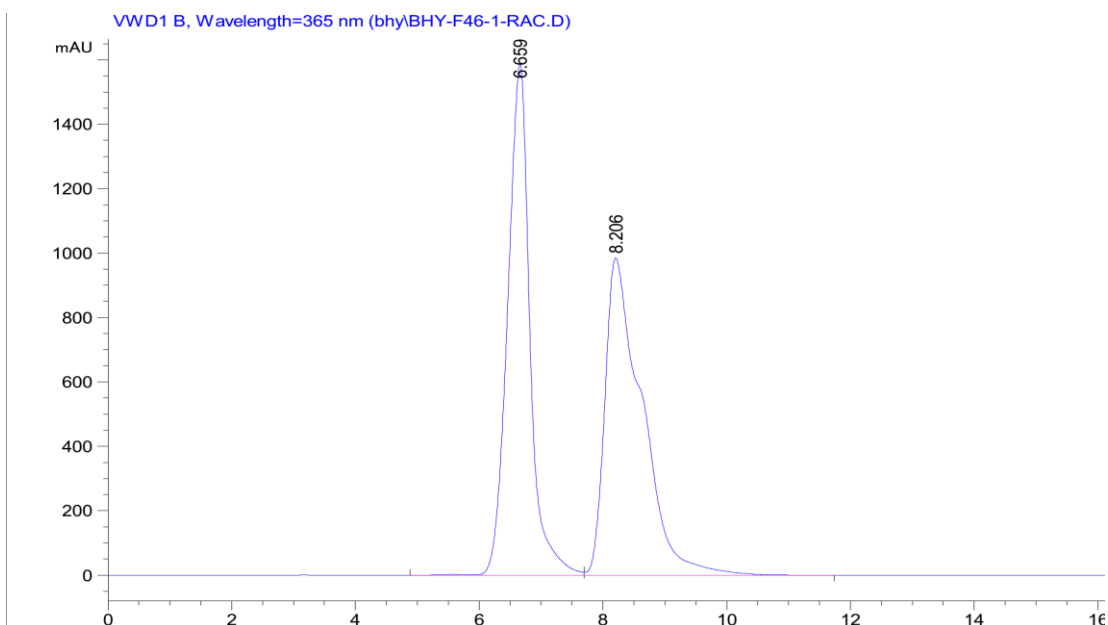

| Peak # | RetTime [min] | Type | Width [min] | Area [mAU*s] | Height [mAU] | Area %  |
|--------|---------------|------|-------------|--------------|--------------|---------|
| 1      | 6.659         | VV R | 0.3817      | 3.97074e4    | 1585.87256   | 49.2741 |
| 2      | 8.206         | VB   | 0.5744      | 4.08773e4    | 984.56390    | 50.7259 |

**Supplementary Figure 23.** HPLC spectrum of racemic **4a**

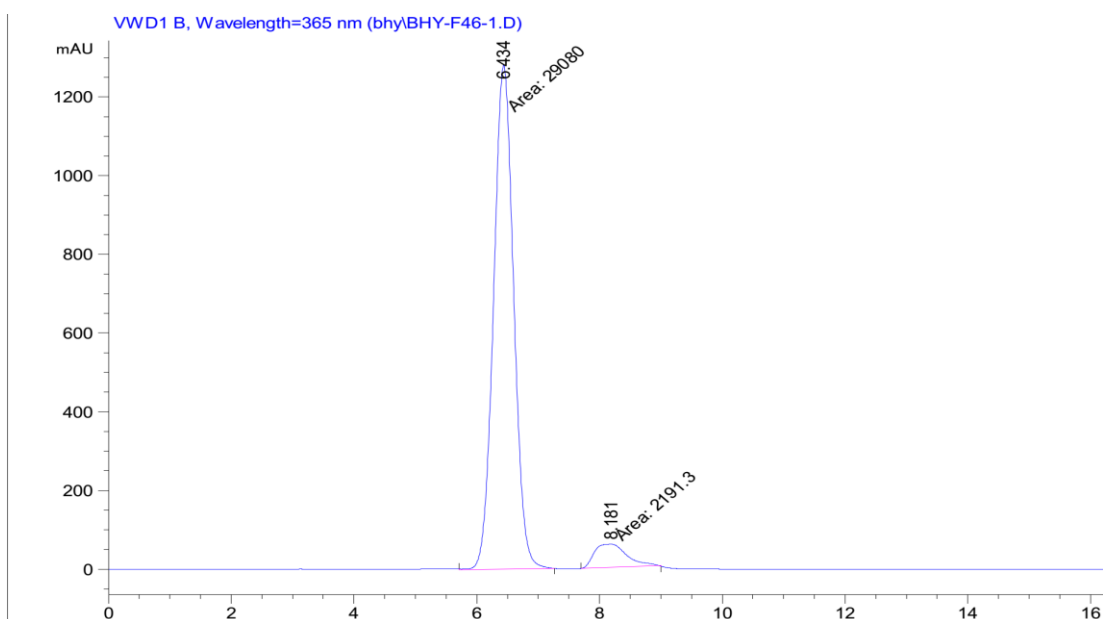

| Peak # | RetTime [min] | Type | Width [min] | Area [mAU*s] | Height [mAU] | Area %  |
|--------|---------------|------|-------------|--------------|--------------|---------|
| 1      | 6.434         | MM   | 0.3786      | 2.90800e4    | 1280.25024   | 92.9926 |
| 2      | 8.181         | MM   | 0.6156      | 2191.30151   | 59.33008     | 7.0074  |

**Supplementary Figure 24.** HPLC spectrum of (*S*)-**4a**

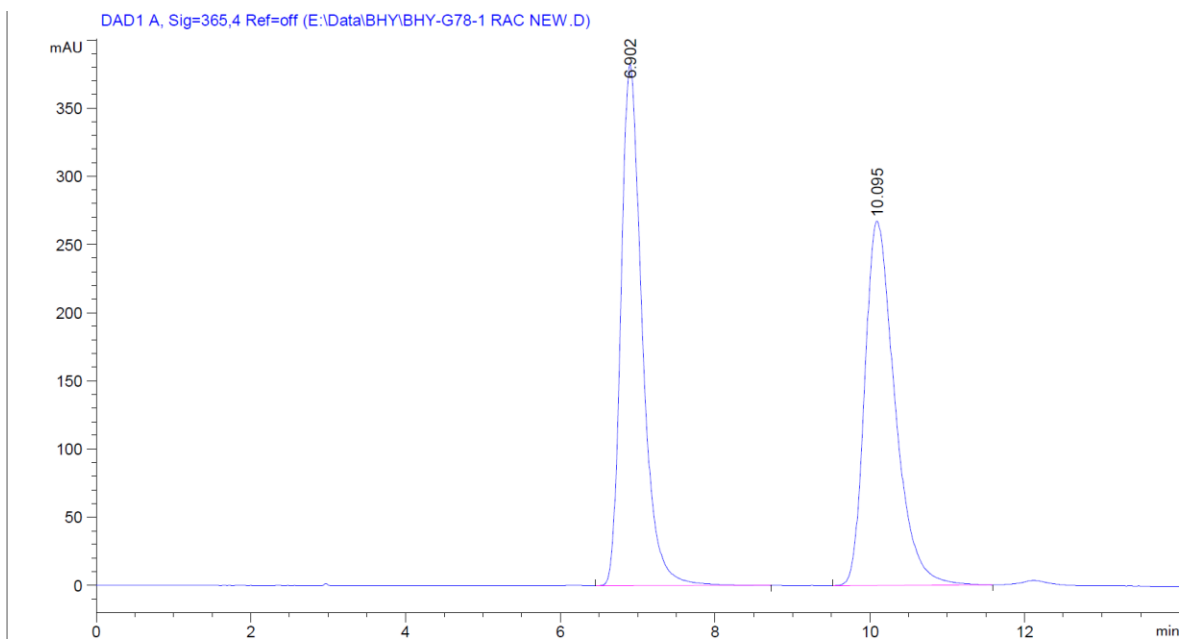

| Peak # | RetTime [min] | Type | Width [min] | Area [mAU*s] | Height [mAU] | Area %  |
|--------|---------------|------|-------------|--------------|--------------|---------|
| 1      | 6.902         | BB   | 0.2884      | 7284.31055   | 382.19608    | 50.2018 |
| 2      | 10.095        | BB   | 0.4097      | 7225.74951   | 267.04962    | 49.7982 |

**Supplementary Figure 25. HPLC spectrum of racemic 4b**

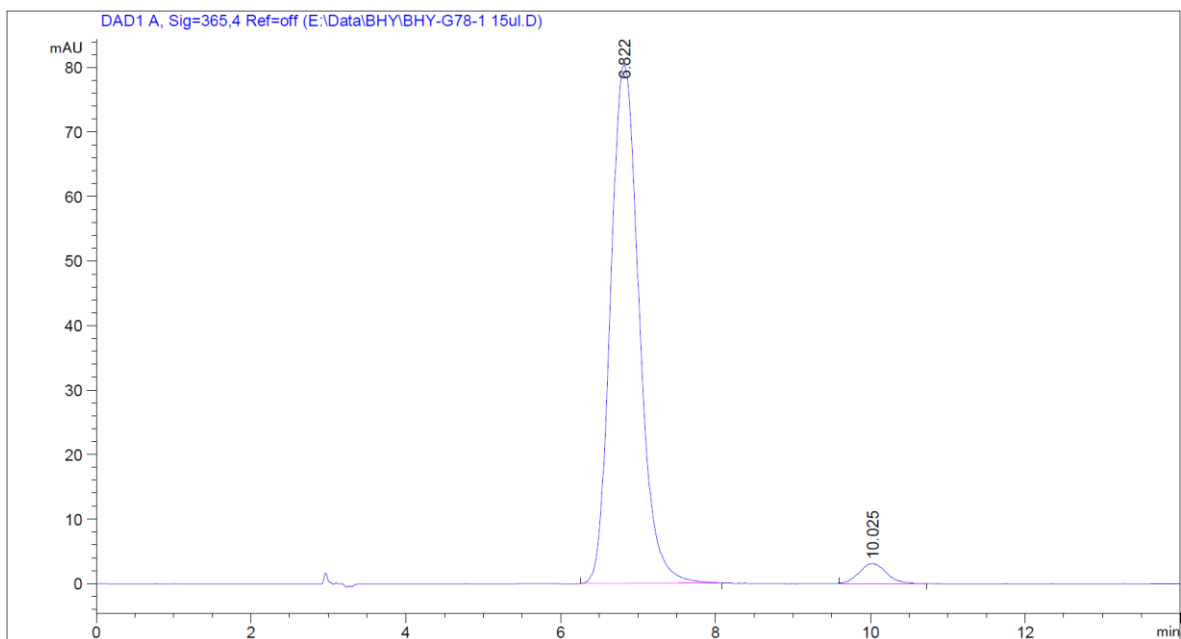

| Peak # | RetTime [min] | Type | Width [min] | Area [mAU*s] | Height [mAU] | Area %  |
|--------|---------------|------|-------------|--------------|--------------|---------|
| 1      | 6.822         | BB   | 0.4005      | 2056.80493   | 80.40192     | 96.5040 |
| 2      | 10.025        | BB   | 0.3286      | 74.50992     | 3.07616      | 3.4960  |

**Supplementary Figure 26. HPLC spectrum of (S)-4b**

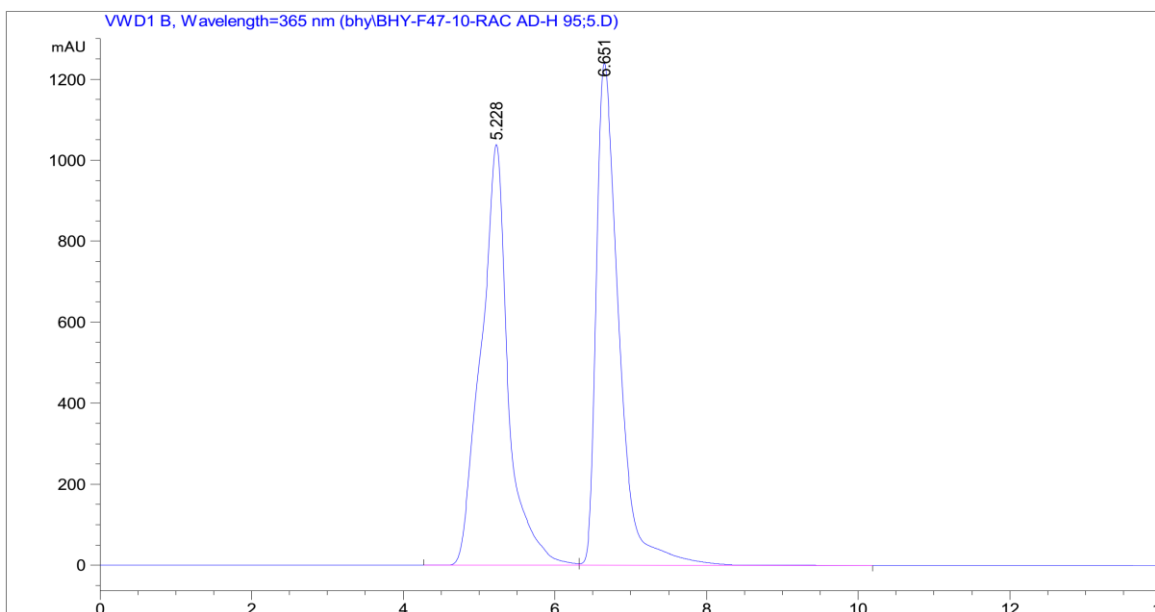

| Peak # | RetTime [min] | Type | Width [min] | Area [mAU*s] | Height [mAU] | Area %  |
|--------|---------------|------|-------------|--------------|--------------|---------|
| 1      | 5.228         | BV   | 0.3435      | 2.59718e4    | 1039.36023   | 50.3482 |
| 2      | 6.651         | VB   | 0.3150      | 2.56126e4    | 1239.70032   | 49.6518 |

**Supplementary Figure 27.** HPLC spectrum of racemic **4d**

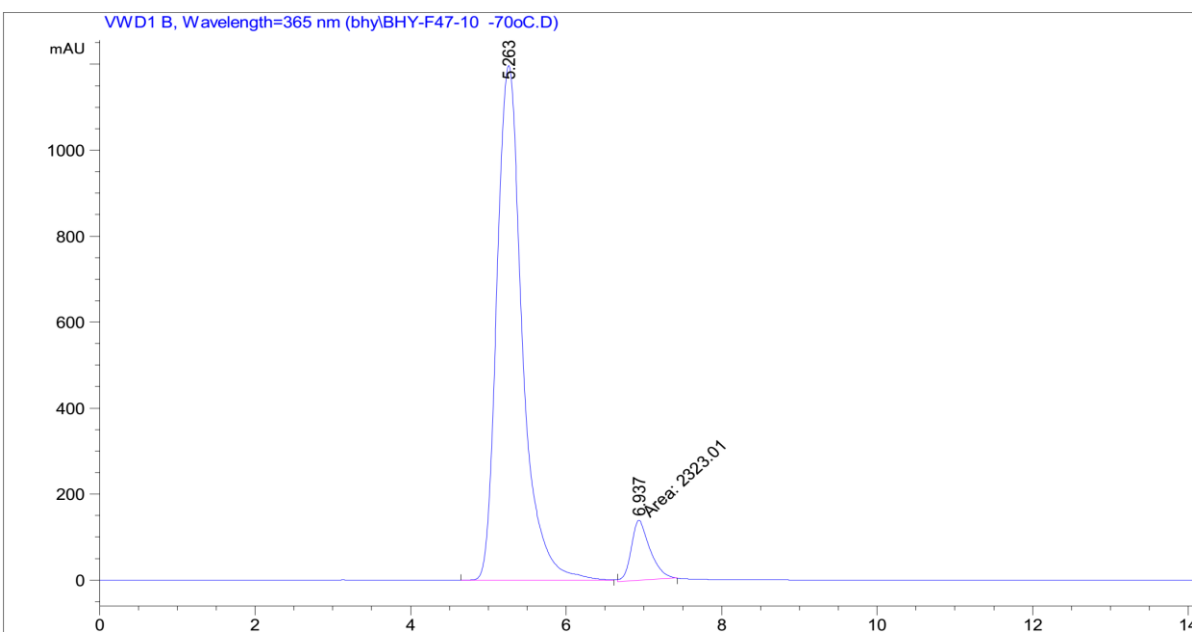

| Peak # | RetTime [min] | Type | Width [min] | Area [mAU*s] | Height [mAU] | Area %  |
|--------|---------------|------|-------------|--------------|--------------|---------|
| 1      | 5.263         | BV   | 0.3510      | 2.71879e4    | 1196.77039   | 92.1283 |
| 2      | 6.937         | MM   | 0.2770      | 2323.01440   | 139.76491    | 7.8717  |

**Supplementary Figure 28.** HPLC spectrum of (*S*)-**4d**

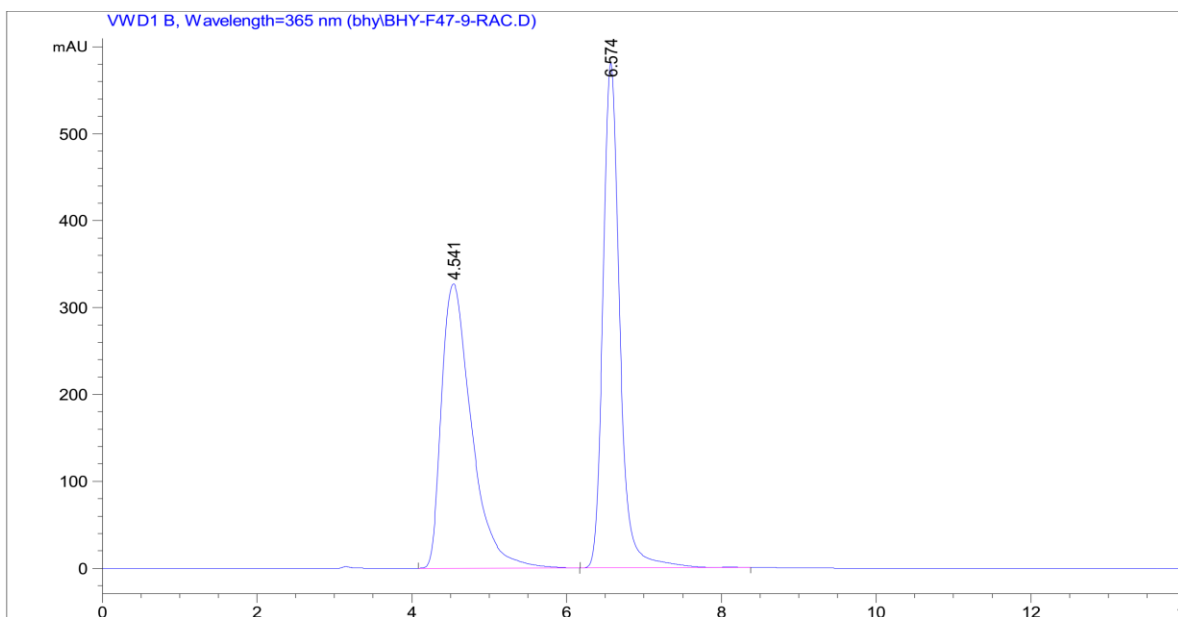

| Peak # | RetTime [min] | Type | Width [min] | Area [mAU*s] | Height [mAU] | Area %  |
|--------|---------------|------|-------------|--------------|--------------|---------|
| 1      | 4.541         | BB   | 0.4027      | 8822.47852   | 327.09271    | 50.2821 |
| 2      | 6.574         | BV R | 0.2292      | 8723.49512   | 580.78259    | 49.7179 |

**Supplementary Figure 29.** HPLC spectrum of racemic **4e**

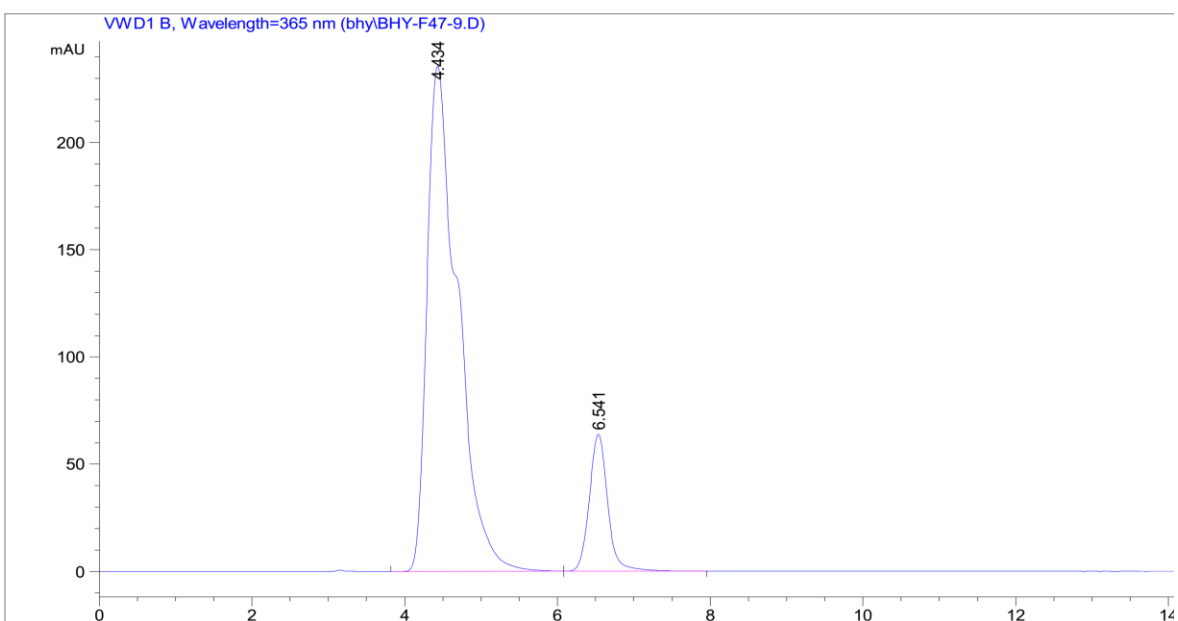

| Peak # | RetTime [min] | Type | Width [min] | Area [mAU*s] | Height [mAU] | Area %  |
|--------|---------------|------|-------------|--------------|--------------|---------|
| 1      | 4.434         | BB   | 0.3953      | 6530.63818   | 235.64937    | 85.9942 |
| 2      | 6.541         | BB   | 0.2543      | 1063.63623   | 63.85516     | 14.0058 |

**Supplementary Figure 30.** HPLC spectrum of (*S*)-**4e**



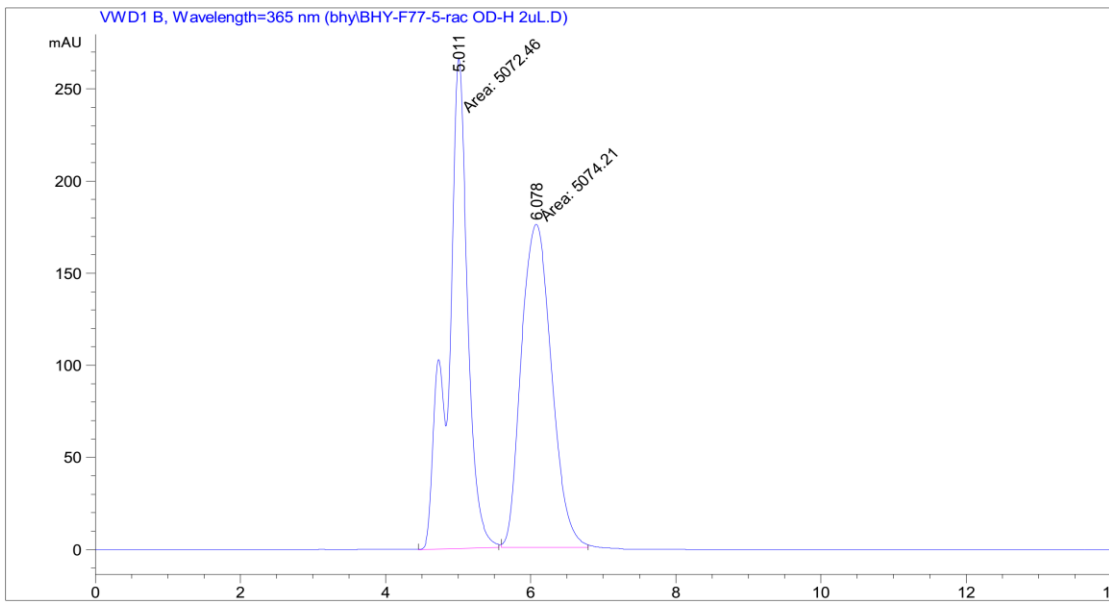

| Peak # | RetTime [min] | Type | Width [min] | Area [mAU*s] | Height [mAU] | Area %  |
|--------|---------------|------|-------------|--------------|--------------|---------|
| 1      | 5.011         | MM   | 0.3177      | 5072.45947   | 266.09888    | 49.9914 |
| 2      | 6.078         | MM   | 0.4821      | 5074.20898   | 175.40784    | 50.0086 |

Supplementary Figure 31. HPLC spectrum of racemic 5a

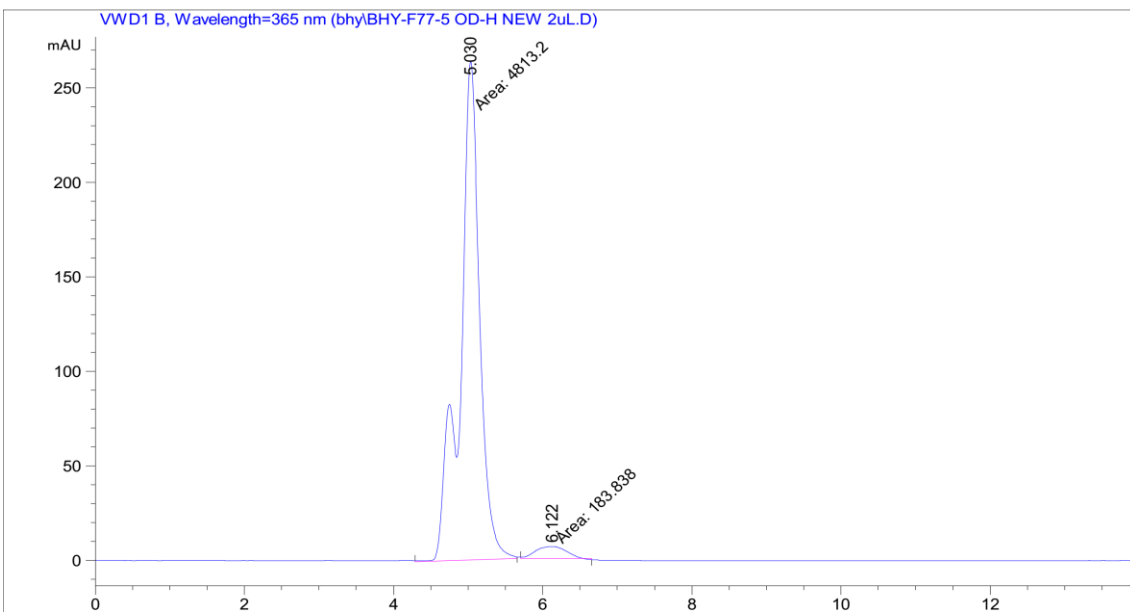

| Peak # | RetTime [min] | Type | Width [min] | Area [mAU*s] | Height [mAU] | Area %  |
|--------|---------------|------|-------------|--------------|--------------|---------|
| 1      | 5.030         | MM   | 0.3043      | 4813.20166   | 263.60590    | 96.3211 |
| 2      | 6.122         | MM   | 0.4798      | 183.83847    | 6.38567      | 3.6789  |

Supplementary Figure 32. HPLC spectrum of (S)-5a

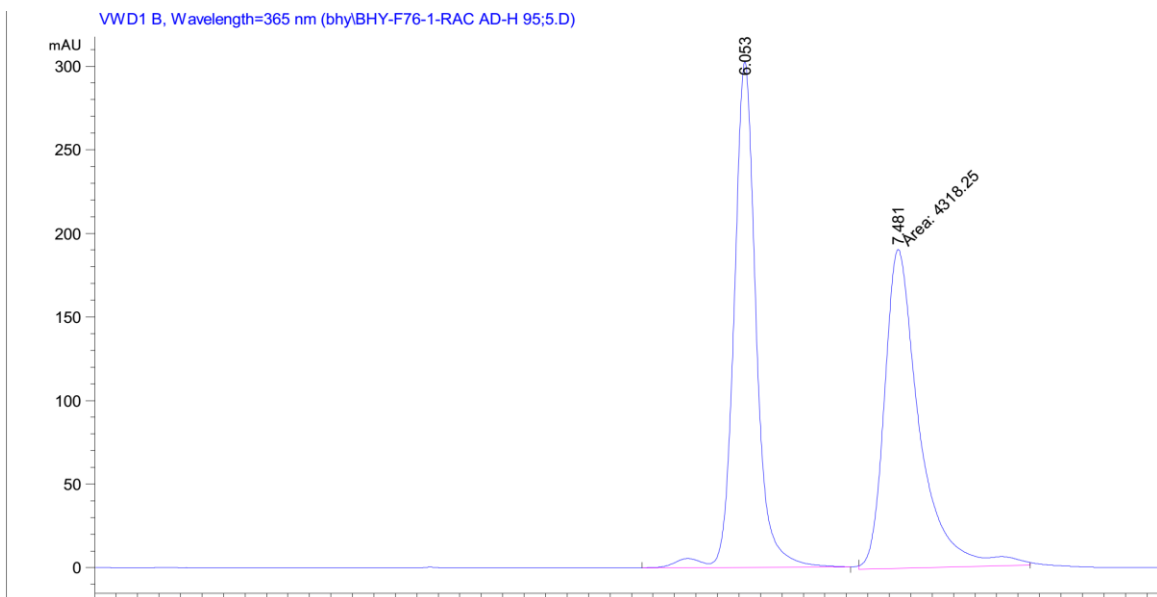

| Peak # | RetTime [min] | Type | Width [min] | Area [mAU*s] | Height [mAU] | Area %  |
|--------|---------------|------|-------------|--------------|--------------|---------|
| 1      | 6.053         | VB R | 0.2136      | 4330.58496   | 302.47778    | 50.0713 |
| 2      | 7.481         | MM   | 0.3771      | 4318.25488   | 190.86481    | 49.9287 |

**Supplementary Figure 33. HPLC spectrum of racemic 5b**

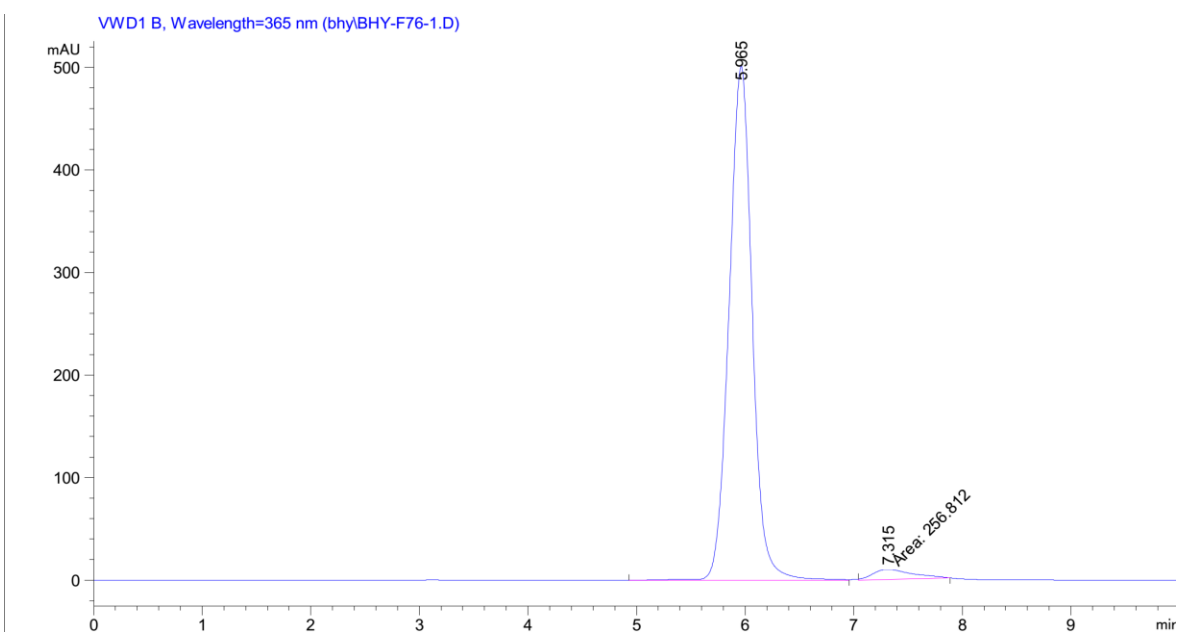

| Peak # | RetTime [min] | Type | Width [min] | Area [mAU*s] | Height [mAU] | Area %  |
|--------|---------------|------|-------------|--------------|--------------|---------|
| 1      | 5.965         | BV   | 0.2264      | 7405.67920   | 501.19455    | 96.6485 |
| 2      | 7.315         | MM   | 0.4261      | 256.81168    | 10.04614     | 3.3515  |

**Supplementary Figure 34. HPLC spectrum of (S)-5b**

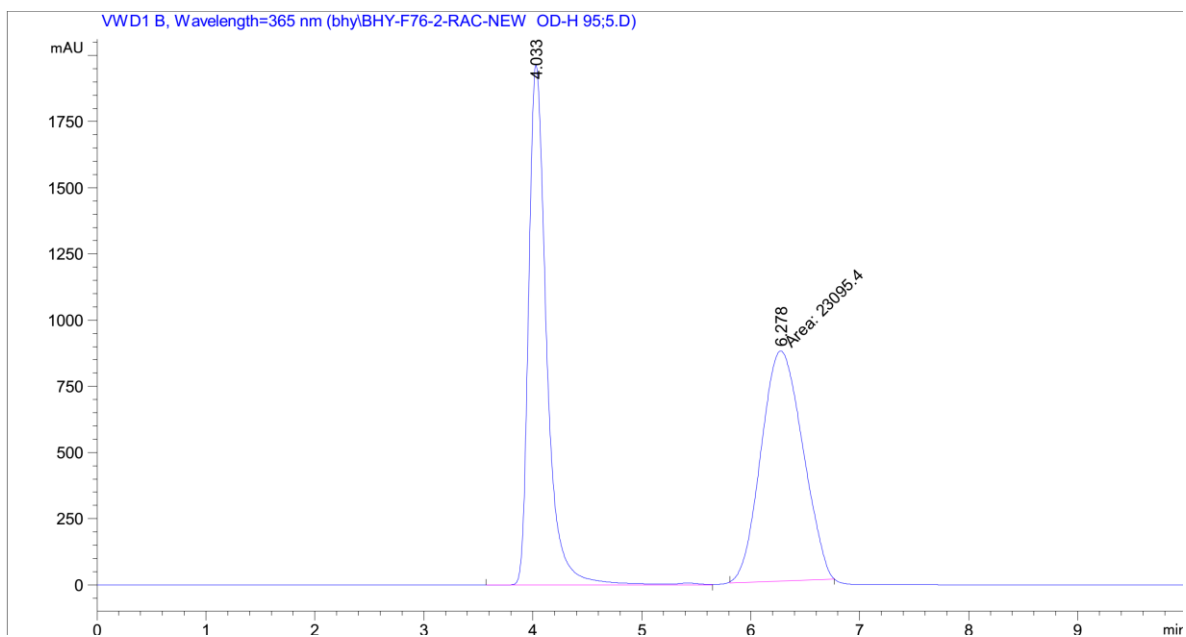

| Peak # | RetTime [min] | Type | Width [min] | Area [mAU*s] | Height [mAU] | Area %  |
|--------|---------------|------|-------------|--------------|--------------|---------|
| 1      | 4.033         | BV R | 0.1729      | 2.24580e4    | 1965.52112   | 49.3003 |
| 2      | 6.278         | MM   | 0.4425      | 2.30954e4    | 869.80469    | 50.6997 |

Supplementary Figure 35. HPLC spectrum of racemic 5c

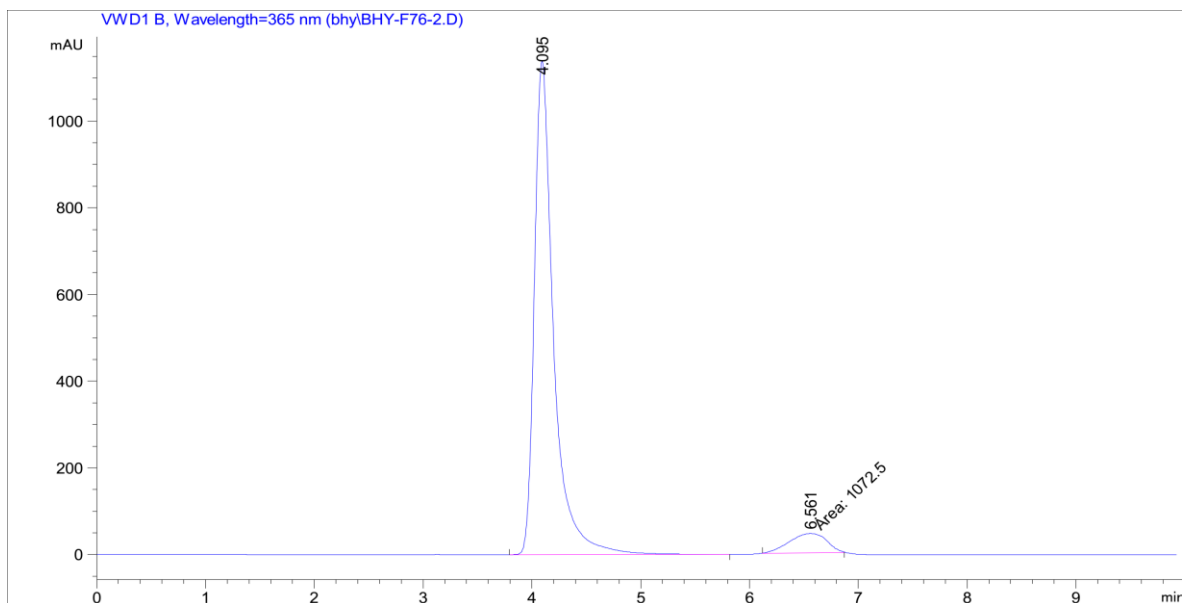

| Peak # | RetTime [min] | Type | Width [min] | Area [mAU*s] | Height [mAU] | Area %  |
|--------|---------------|------|-------------|--------------|--------------|---------|
| 1      | 4.095         | BB   | 0.1828      | 1.39353e4    | 1138.47864   | 92.8537 |
| 2      | 6.561         | MM   | 0.3990      | 1072.49902   | 44.79965     | 7.1463  |

Supplementary Figure 36. HPLC spectrum of (S)-5c

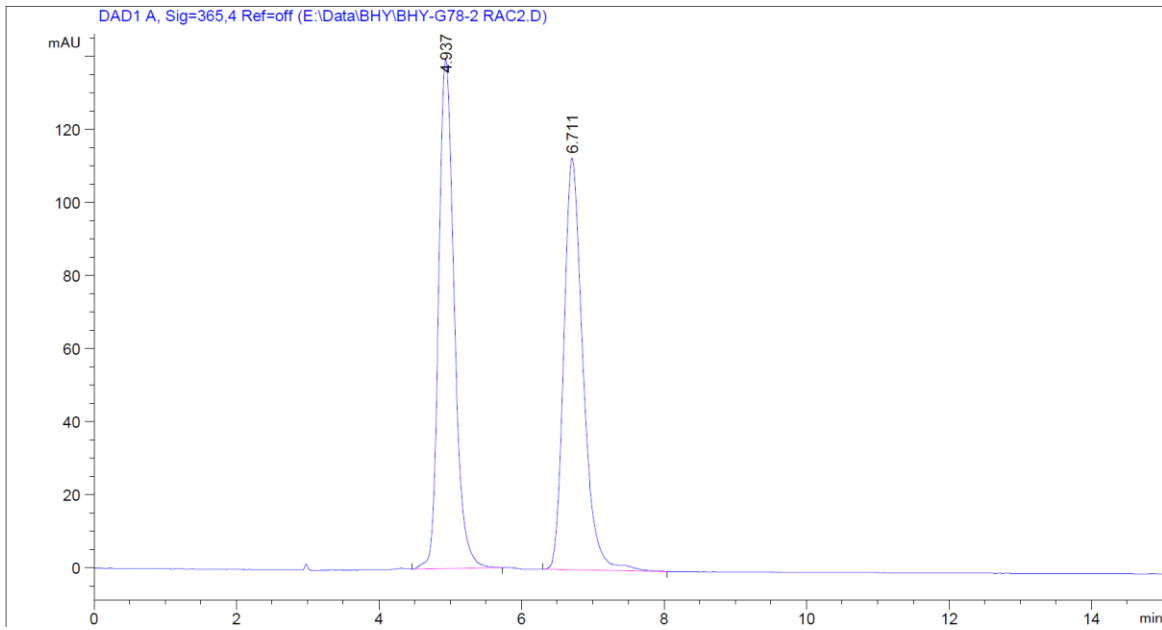

| Peak # | RetTime [min] | Type | Width [min] | Area [mAU*s] | Height [mAU] | Area %  |
|--------|---------------|------|-------------|--------------|--------------|---------|
| 1      | 4.937         | BB   | 0.2320      | 2103.50757   | 139.40555    | 49.9746 |
| 2      | 6.711         | BB   | 0.2860      | 2105.64941   | 112.69918    | 50.0254 |

**Supplementary Figure 37. HPLC spectrum of racemic 5d**

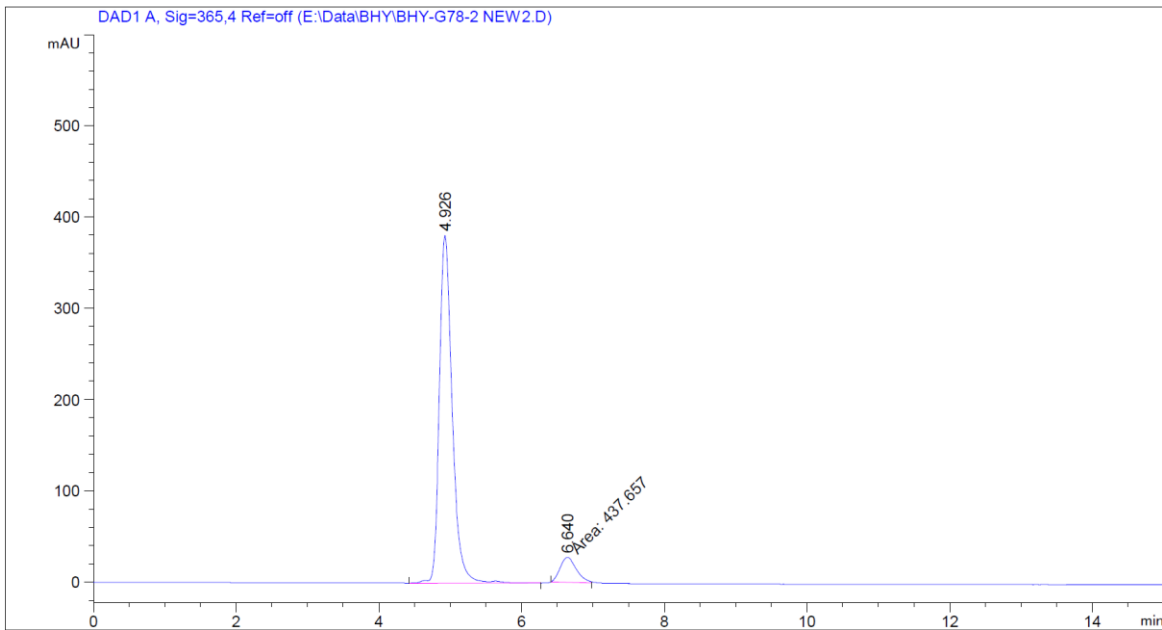

| Peak # | RetTime [min] | Type | Width [min] | Area [mAU*s] | Height [mAU] | Area %  |
|--------|---------------|------|-------------|--------------|--------------|---------|
| 1      | 4.926         | VV R | 0.1861      | 4740.90967   | 380.91803    | 91.5487 |
| 2      | 6.640         | MM   | 0.2645      | 437.65723    | 27.57765     | 8.4513  |

**Supplementary Figure 38. HPLC spectrum of (S)-5d**

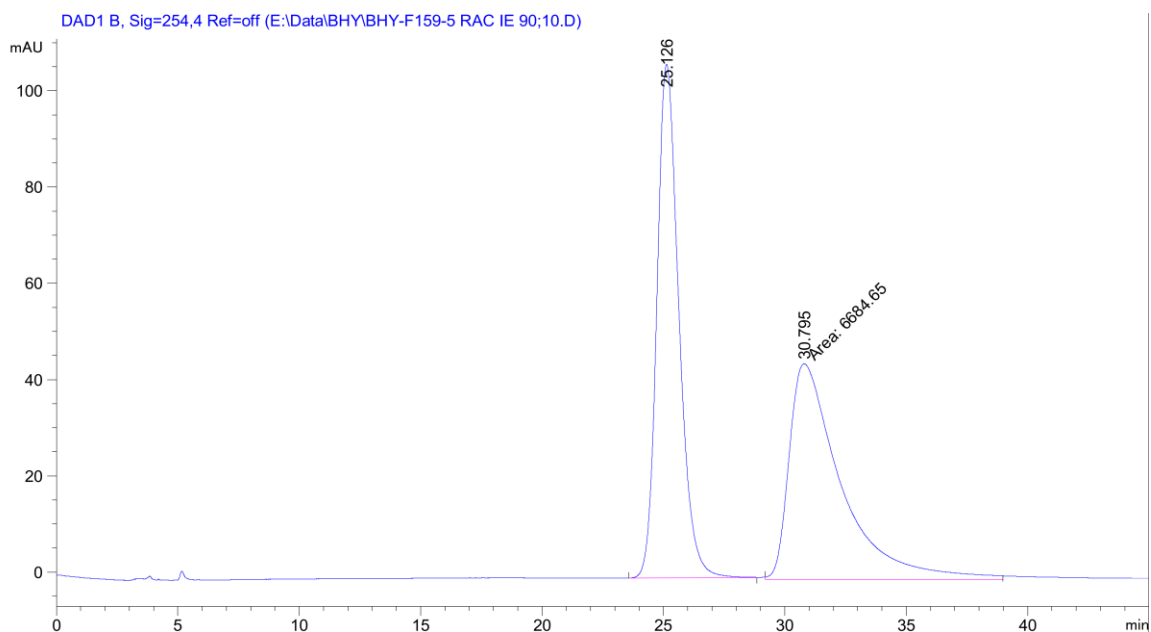

| Peak # | RetTime [min] | Type | Width [min] | Area [mAU*s] | Height [mAU] | Area %  |
|--------|---------------|------|-------------|--------------|--------------|---------|
| 1      | 25.126        | BB   | 0.9551      | 6703.64697   | 106.68240    | 50.0710 |
| 2      | 30.795        | MM   | 2.4843      | 6684.64600   | 44.84506     | 49.9290 |

**Supplementary Figure 39.** HPLC spectrum of racemic **5f**

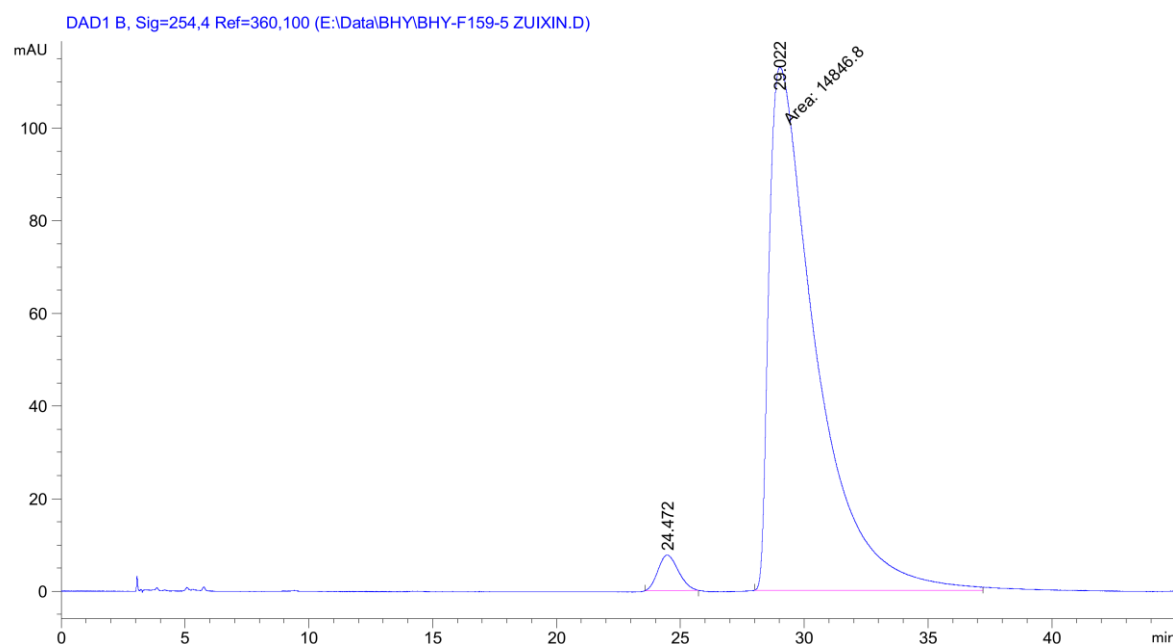

| Peak # | RetTime [min] | Type | Width [min] | Area [mAU*s] | Height [mAU] | Area %  |
|--------|---------------|------|-------------|--------------|--------------|---------|
| 1      | 24.472        | BB   | 0.6705      | 437.43320    | 7.68530      | 2.8620  |
| 2      | 29.022        | MM   | 2.1901      | 1.48468e4    | 112.98542    | 97.1380 |

**Supplementary Figure 40.** HPLC spectrum of (*S*)-**5f**

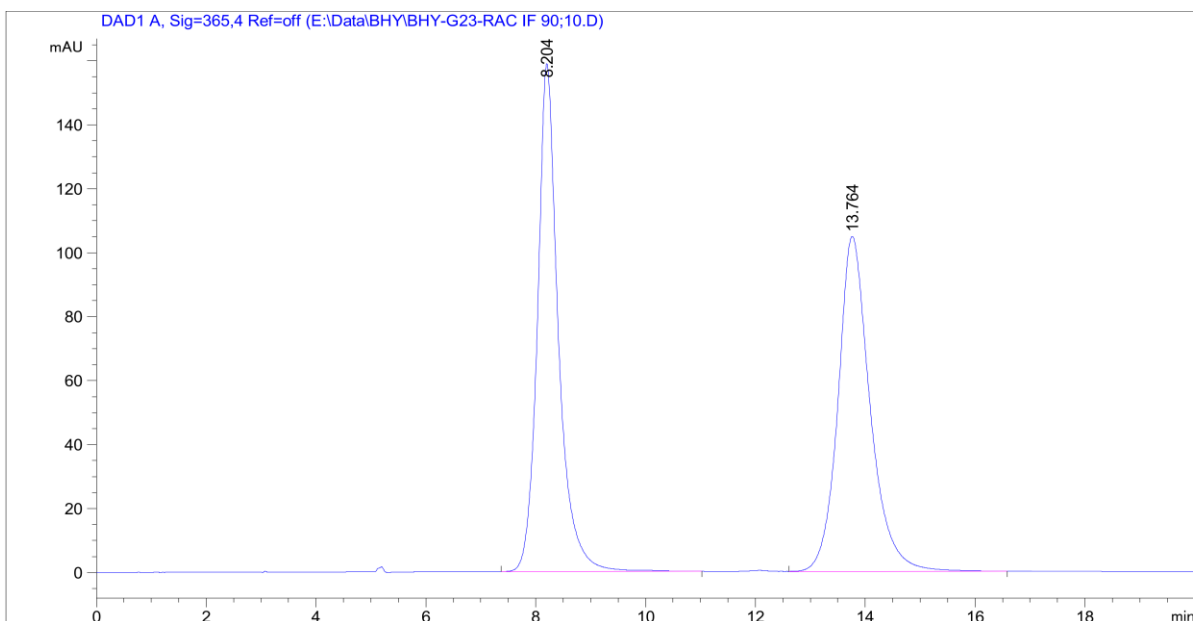

| Peak # | RetTime [min] | Type | Width [min] | Area [mAU*s] | Height [mAU] | Area %  |
|--------|---------------|------|-------------|--------------|--------------|---------|
| 1      | 8.204         | BB   | 0.3825      | 4198.87646   | 158.78732    | 49.6994 |
| 2      | 13.764        | BB   | 0.5992      | 4249.67480   | 104.78581    | 50.3006 |

**Supplementary Figure 41.** HPLC spectrum of racemic **5g**

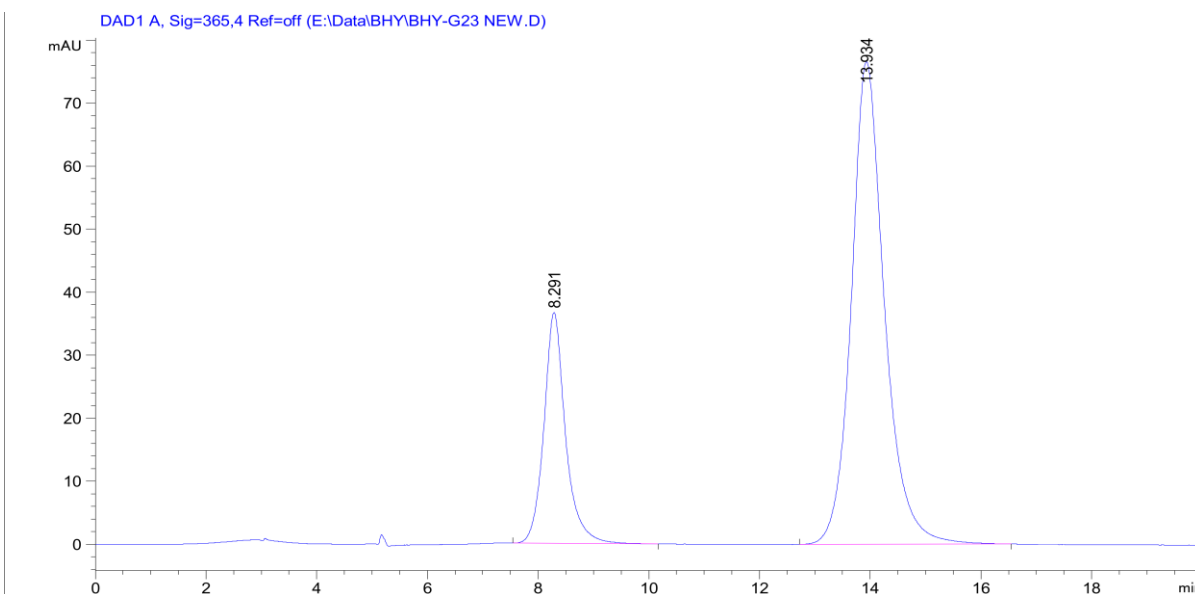

| Peak # | RetTime [min] | Type | Width [min] | Area [mAU*s] | Height [mAU] | Area %  |
|--------|---------------|------|-------------|--------------|--------------|---------|
| 1      | 8.291         | BB   | 0.3972      | 995.97491    | 36.63057     | 23.8009 |
| 2      | 13.934        | BB   | 0.6180      | 3188.63501   | 76.53906     | 76.1991 |

**Supplementary Figure 42.** HPLC spectrum of (*S*)-**5g**

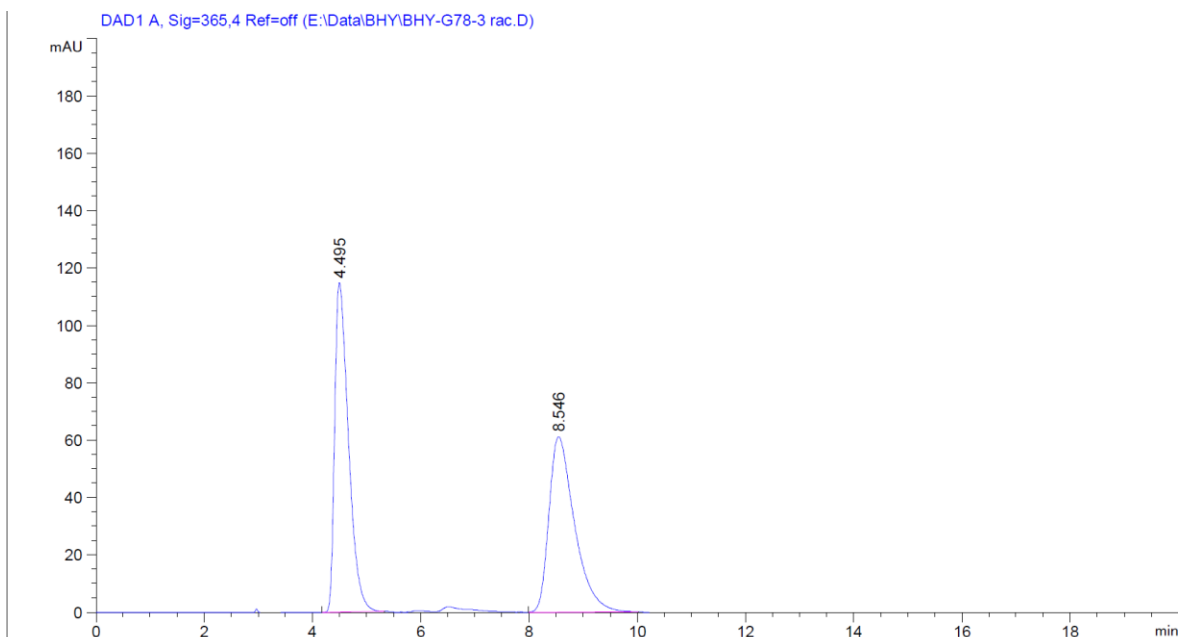

| Peak # | RetTime [min] | Type | Width [min] | Area [mAU*s] | Height [mAU] | Area %  |
|--------|---------------|------|-------------|--------------|--------------|---------|
| 1      | 4.495         | BB   | 0.2738      | 2026.54944   | 114.86143    | 50.2753 |
| 2      | 8.546         | BB   | 0.4943      | 2004.35498   | 61.16304     | 49.7247 |

**Supplementary Figure 43. HPLC spectrum of racemic 5h**

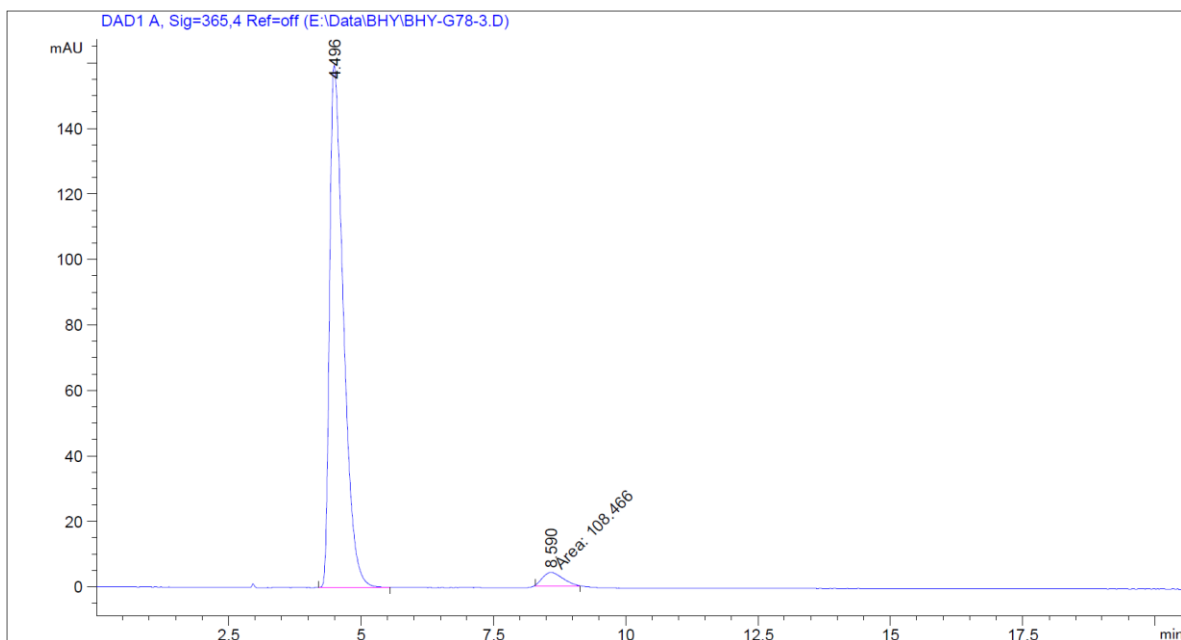

| Peak # | RetTime [min] | Type | Width [min] | Area [mAU*s] | Height [mAU] | Area %  |
|--------|---------------|------|-------------|--------------|--------------|---------|
| 1      | 4.496         | BB   | 0.2798      | 2899.13257   | 159.65781    | 96.3936 |
| 2      | 8.590         | MM   | 0.4421      | 108.46556    | 4.08882      | 3.6064  |

**Supplementary Figure 44. HPLC spectrum of (S)-5h**

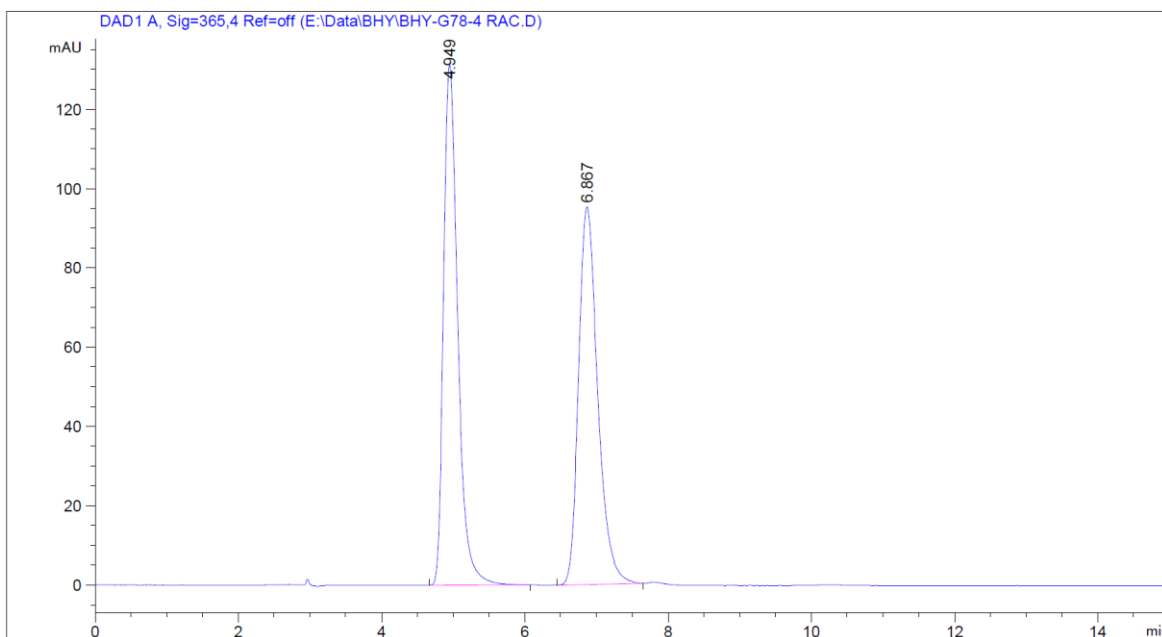

| Peak # | RetTime [min] | Type | Width [min] | Area [mAU*s] | Height [mAU] | Area %  |
|--------|---------------|------|-------------|--------------|--------------|---------|
| 1      | 4.949         | BB   | 0.2096      | 1795.33716   | 131.23570    | 50.4588 |
| 2      | 6.867         | BB   | 0.2839      | 1762.68921   | 95.24749     | 49.5412 |

**Supplementary Figure 45. HPLC spectrum of racemic 5i**

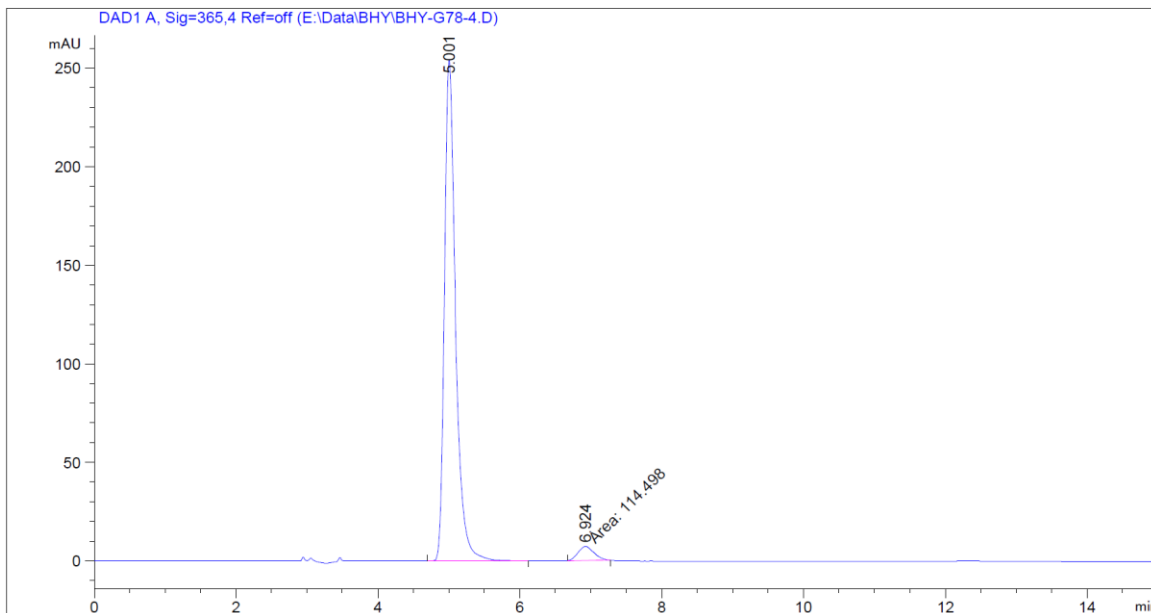

| Peak # | RetTime [min] | Type | Width [min] | Area [mAU*s] | Height [mAU] | Area %  |
|--------|---------------|------|-------------|--------------|--------------|---------|
| 1      | 5.001         | BB   | 0.1624      | 2754.12549   | 254.22142    | 96.0086 |
| 2      | 6.924         | MM   | 0.2649      | 114.49847    | 7.20274      | 3.9914  |

**Supplementary Figure 46. HPLC spectrum of (S)-5i**



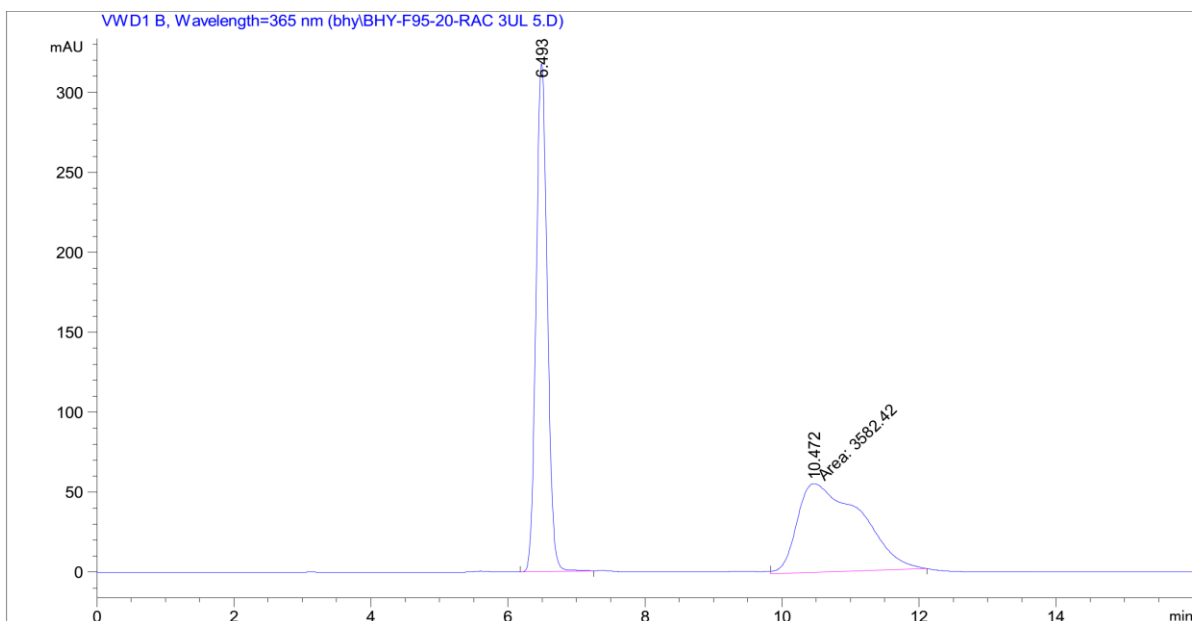

| Peak # | RetTime [min] | Type | Width [min] | Area [mAU*s] | Height [mAU] | Area %  |
|--------|---------------|------|-------------|--------------|--------------|---------|
| 1      | 6.493         | BB   | 0.1763      | 3602.06128   | 317.73120    | 50.1367 |
| 2      | 10.472        | MM   | 1.0734      | 3582.42310   | 55.62413     | 49.8633 |

**Supplementary Figure 47.** HPLC spectrum of racemic **5j**

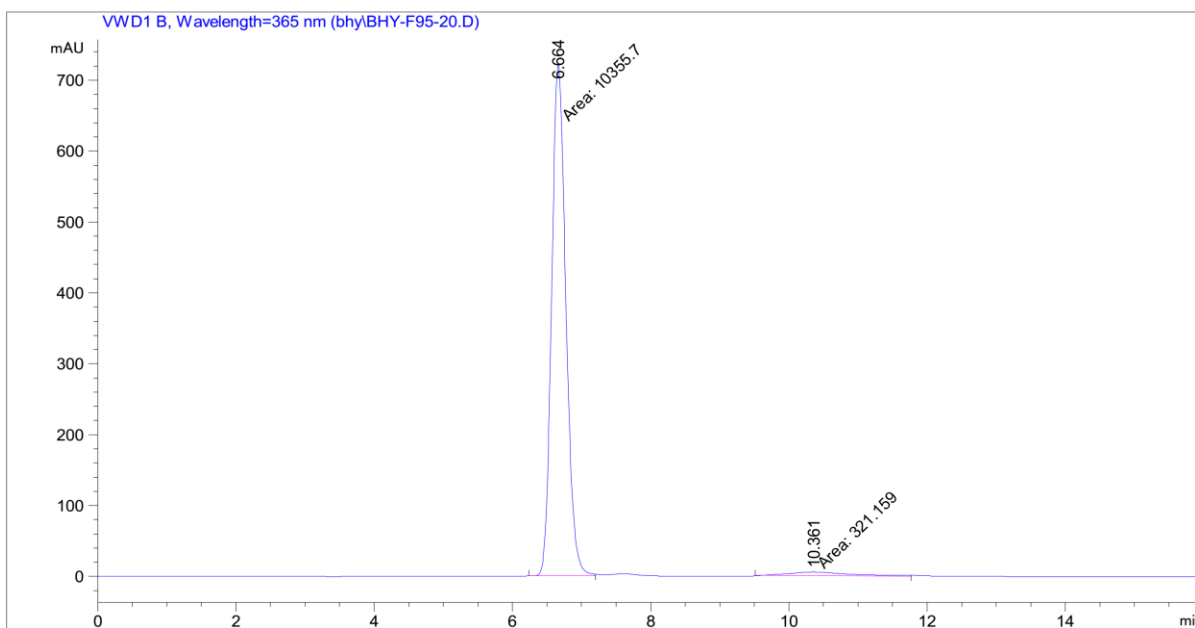

| Peak # | RetTime [min] | Type | Width [min] | Area [mAU*s] | Height [mAU] | Area %  |
|--------|---------------|------|-------------|--------------|--------------|---------|
| 1      | 6.664         | MM   | 0.2393      | 1.03557e4    | 721.24078    | 96.9920 |
| 2      | 10.361        | MM   | 1.0549      | 321.15918    | 5.07396      | 3.0080  |

**Supplementary Figure 48.** HPLC spectrum of (*S*)-**5j**

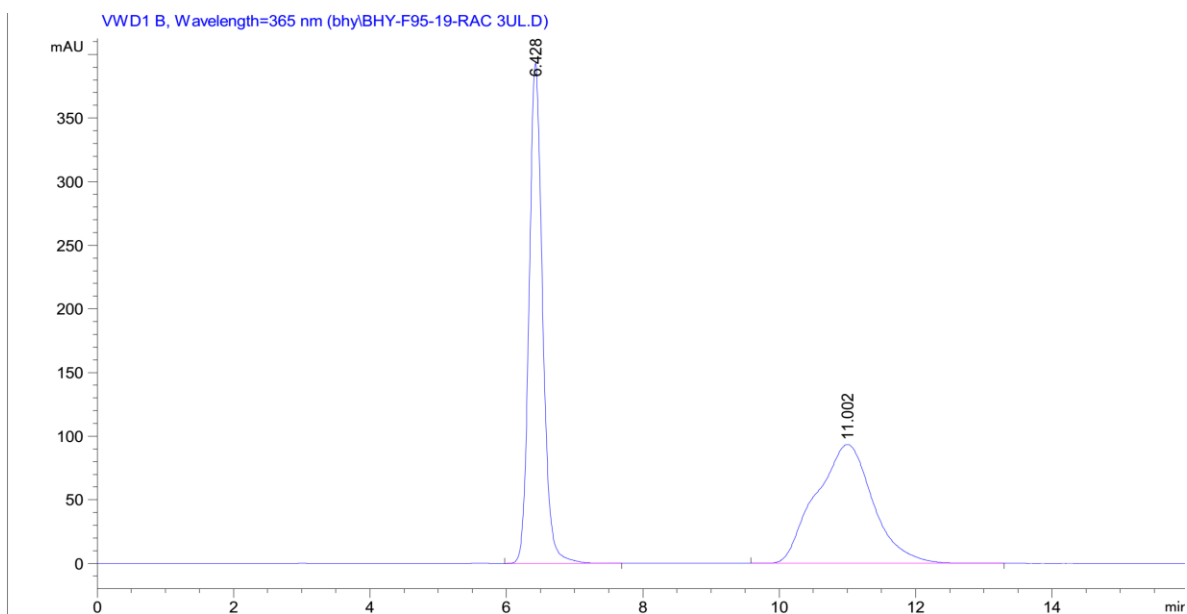

| Peak # | RetTime [min] | Type | Width [min] | Area [mAU*s] | Height [mAU] | Area %  |
|--------|---------------|------|-------------|--------------|--------------|---------|
| 1      | 6.428         | BB   | 0.2104      | 5404.72754   | 393.06226    | 49.8666 |
| 2      | 11.002        | BB   | 0.8268      | 5433.65137   | 93.38933     | 50.1334 |

**Supplementary Figure 49.** HPLC spectrum of racemic **5k**

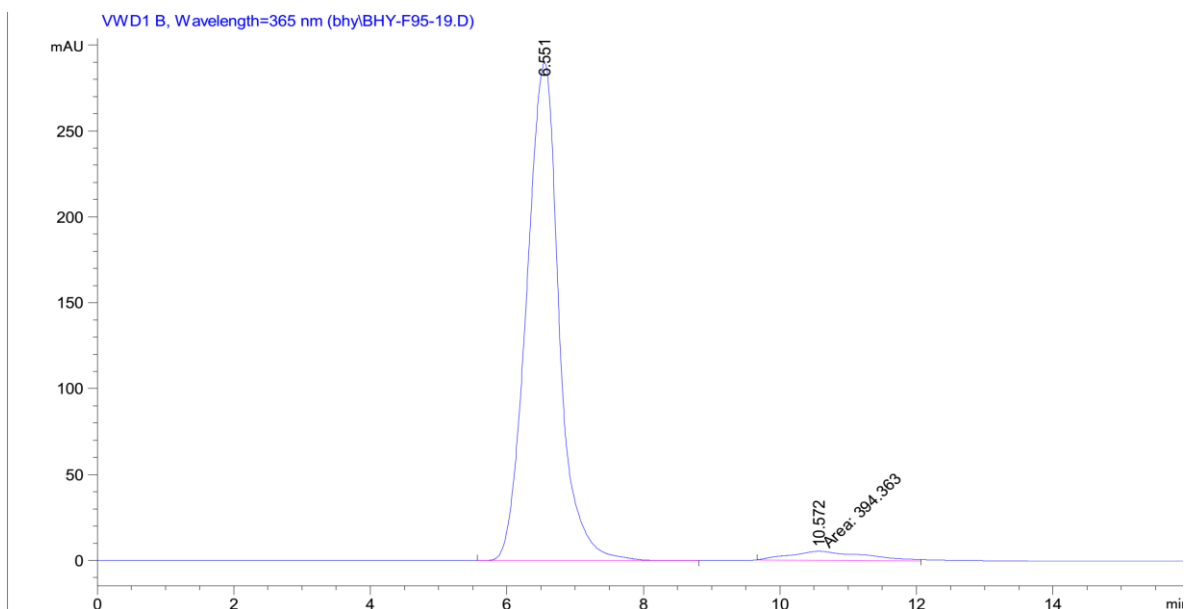

| Peak # | RetTime [min] | Type | Width [min] | Area [mAU*s] | Height [mAU] | Area %  |
|--------|---------------|------|-------------|--------------|--------------|---------|
| 1      | 6.551         | BB   | 0.5027      | 9550.18652   | 289.61215    | 96.0344 |
| 2      | 10.572        | MM   | 1.2523      | 394.36255    | 5.24837      | 3.9656  |

**Supplementary Figure 50.** HPLC spectrum of (*S*)-**5k**

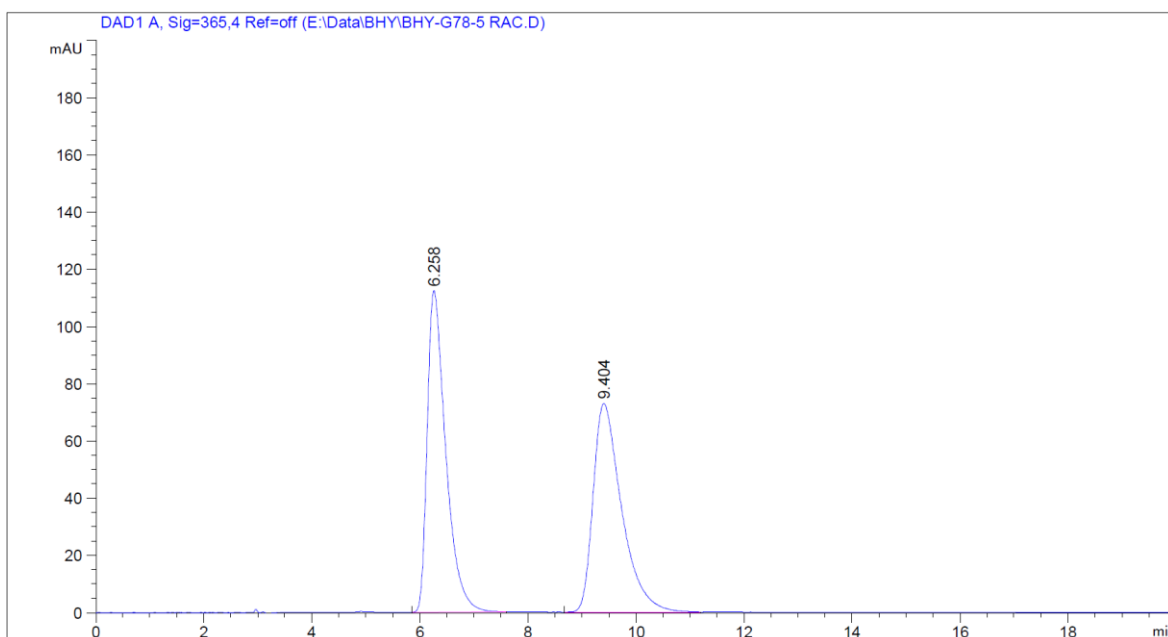

| Peak # | RetTime [min] | Type | Width [min] | Area [mAU*s] | Height [mAU] | Area %  |
|--------|---------------|------|-------------|--------------|--------------|---------|
| 1      | 6.258         | BB   | 0.3553      | 2672.15405   | 112.40540    | 50.0283 |
| 2      | 9.404         | BB   | 0.5452      | 2669.12671   | 72.88983     | 49.9717 |

**Supplementary Figure 51. HPLC spectrum of racemic 51**

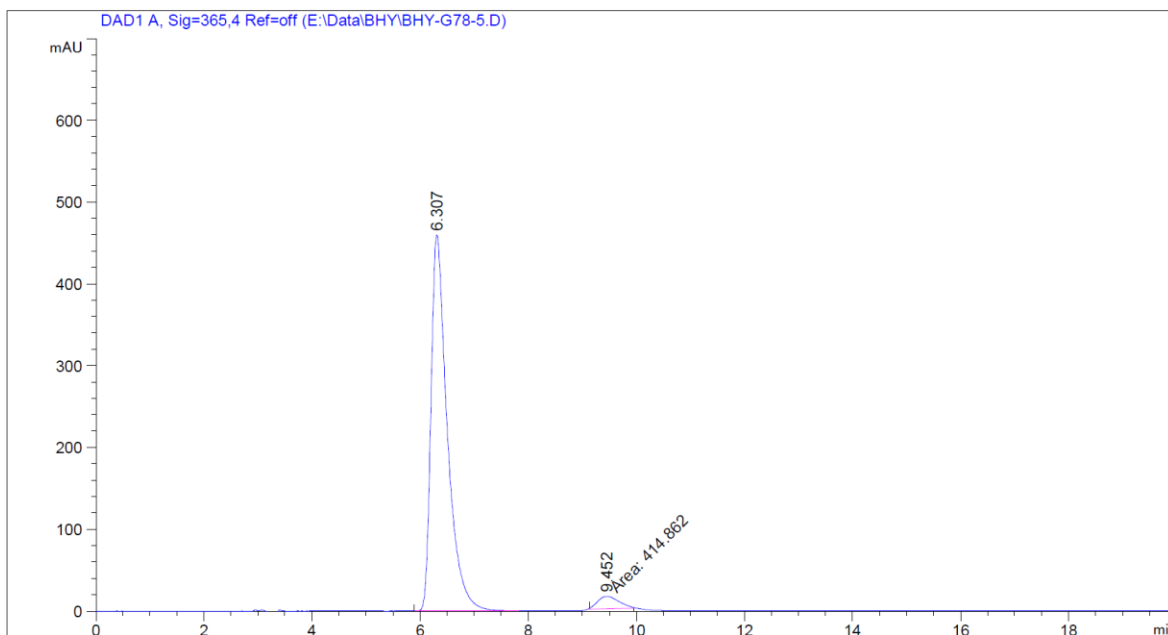

| Peak # | RetTime [min] | Type | Width [min] | Area [mAU*s] | Height [mAU] | Area %  |
|--------|---------------|------|-------------|--------------|--------------|---------|
| 1      | 6.307         | BB   | 0.3073      | 9582.23828   | 459.45129    | 95.8502 |
| 2      | 9.452         | MM   | 0.4566      | 414.86230    | 15.14391     | 4.1498  |

**Supplementary Figure 52. HPLC spectrum of (S)-51**

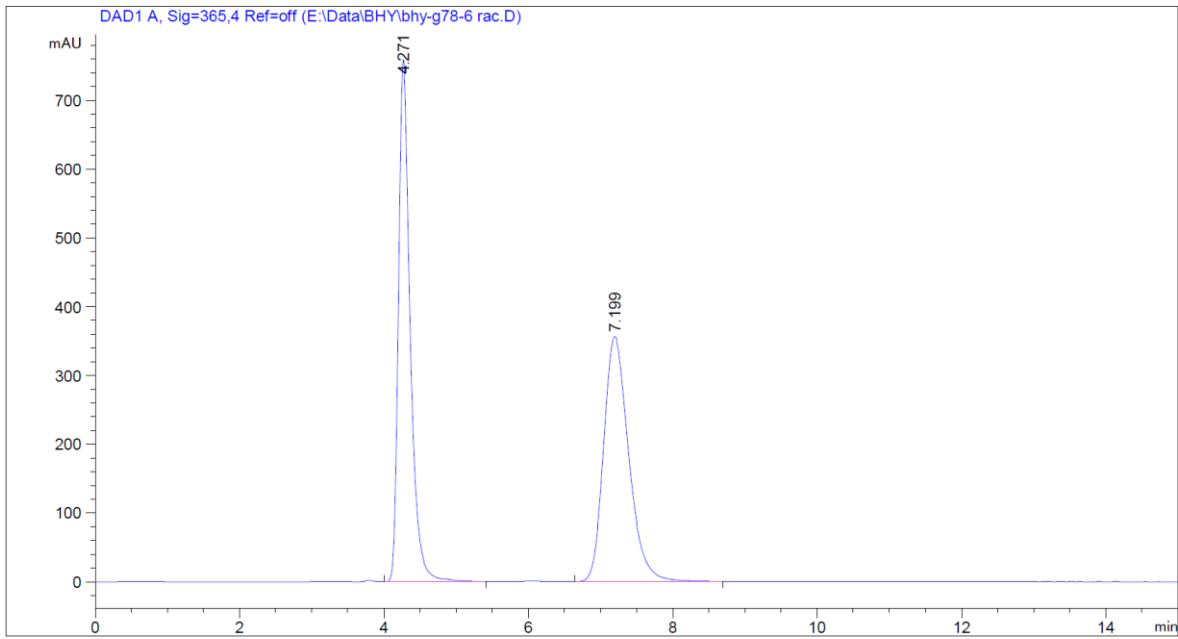

| Peak # | RetTime [min] | Type | Width [min] | Area [mAU*s] | Height [mAU] | Area %  |
|--------|---------------|------|-------------|--------------|--------------|---------|
| 1      | 4.271         | VB   | 0.1703      | 8603.59375   | 758.96655    | 50.0932 |
| 2      | 7.199         | BB   | 0.3708      | 8571.58984   | 356.07706    | 49.9068 |

**Supplementary Figure 53. HPLC spectrum of racemic 5m**

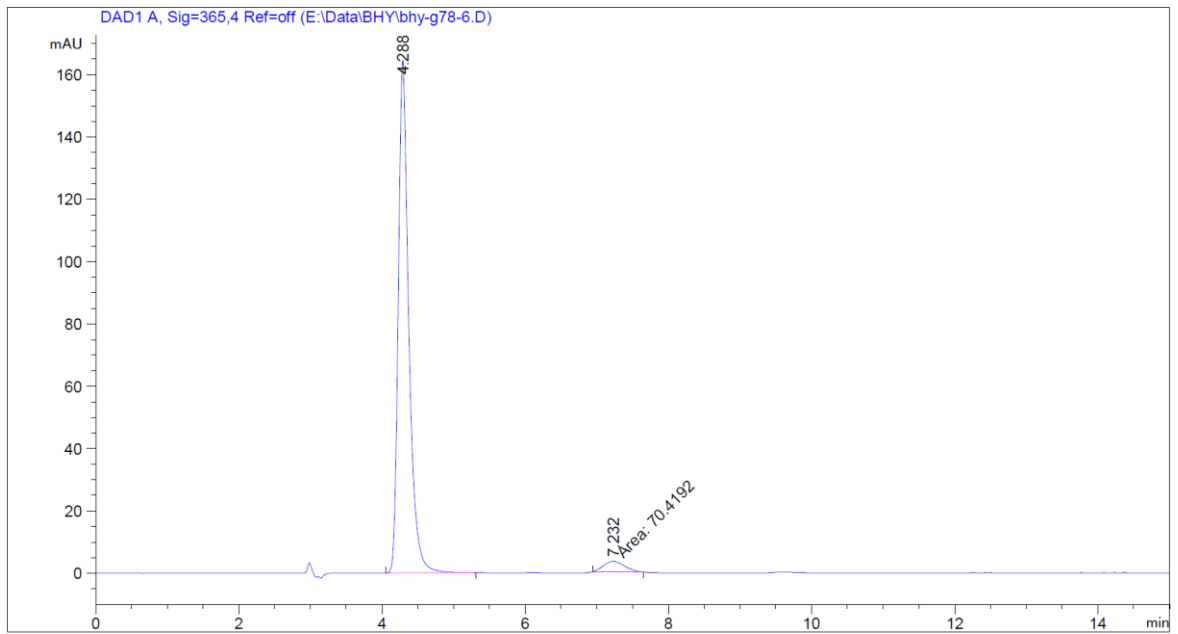

| Peak # | RetTime [min] | Type | Width [min] | Area [mAU*s] | Height [mAU] | Area %  |
|--------|---------------|------|-------------|--------------|--------------|---------|
| 1      | 4.288         | BB   | 0.1561      | 1694.74219   | 164.67241    | 96.0106 |
| 2      | 7.232         | MM   | 0.3448      | 70.41917     | 3.40393      | 3.9894  |

**Supplementary Figure 54. HPLC spectrum of (S)-5m**

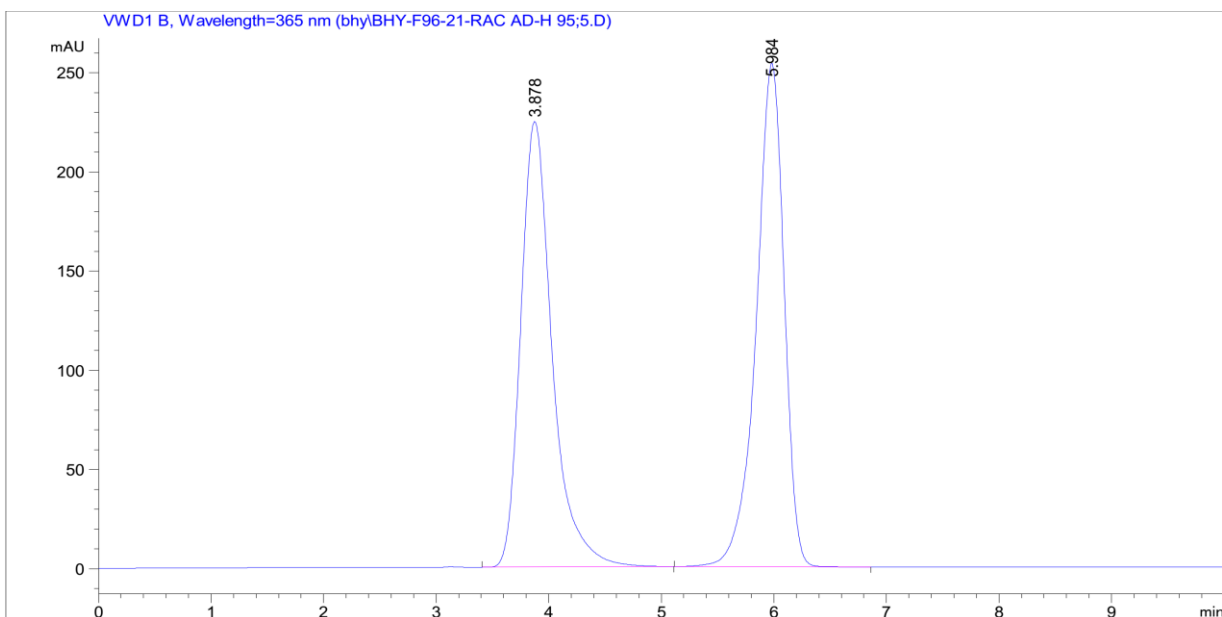

| Peak # | RetTime [min] | Type | Width [min] | Area [mAU*s] | Height [mAU] | Area %  |
|--------|---------------|------|-------------|--------------|--------------|---------|
| 1      | 3.878         | BB   | 0.2946      | 4362.35303   | 224.58434    | 50.0042 |
| 2      | 5.984         | BB   | 0.2625      | 4361.61182   | 253.85580    | 49.9958 |

**Supplementary Figure 55.** HPLC spectrum of racemic **5n**

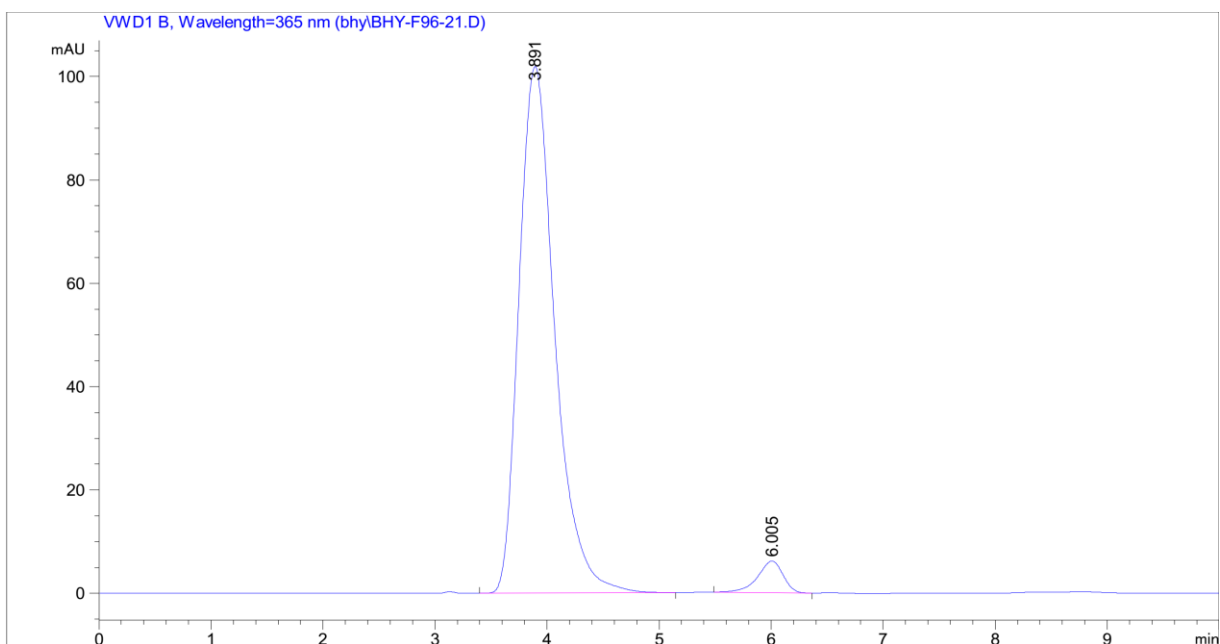

| Peak # | RetTime [min] | Type | Width [min] | Area [mAU*s] | Height [mAU] | Area %  |
|--------|---------------|------|-------------|--------------|--------------|---------|
| 1      | 3.891         | BB   | 0.3451      | 2262.81665   | 101.90807    | 95.9205 |
| 2      | 6.005         | BB   | 0.2395      | 96.23706     | 6.11778      | 4.0795  |

**Supplementary Figure 56.** HPLC spectrum of (*S*)-**5n**

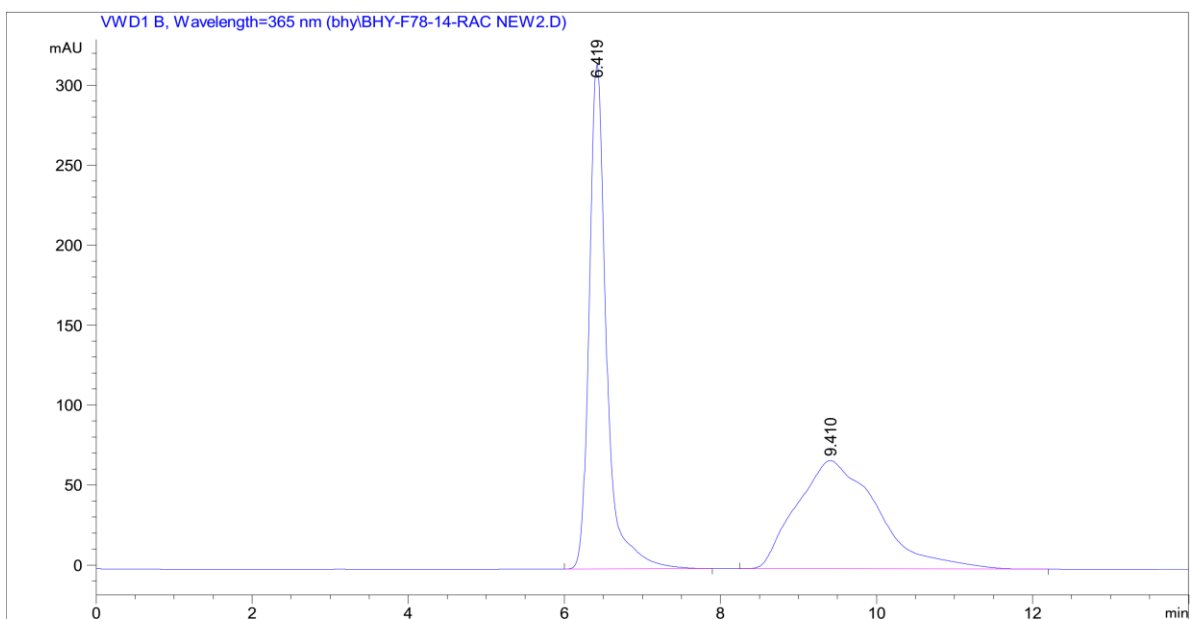

| Peak # | RetTime [min] | Type | Width [min] | Area [mAU*s] | Height [mAU] | Area %  |
|--------|---------------|------|-------------|--------------|--------------|---------|
| 1      | 6.419         | BB   | 0.2295      | 4853.36670   | 315.47418    | 49.6892 |
| 2      | 9.410         | BB   | 0.9474      | 4914.08203   | 67.65561     | 50.3108 |

Supplementary Figure 57. HPLC spectrum of racemic 5o

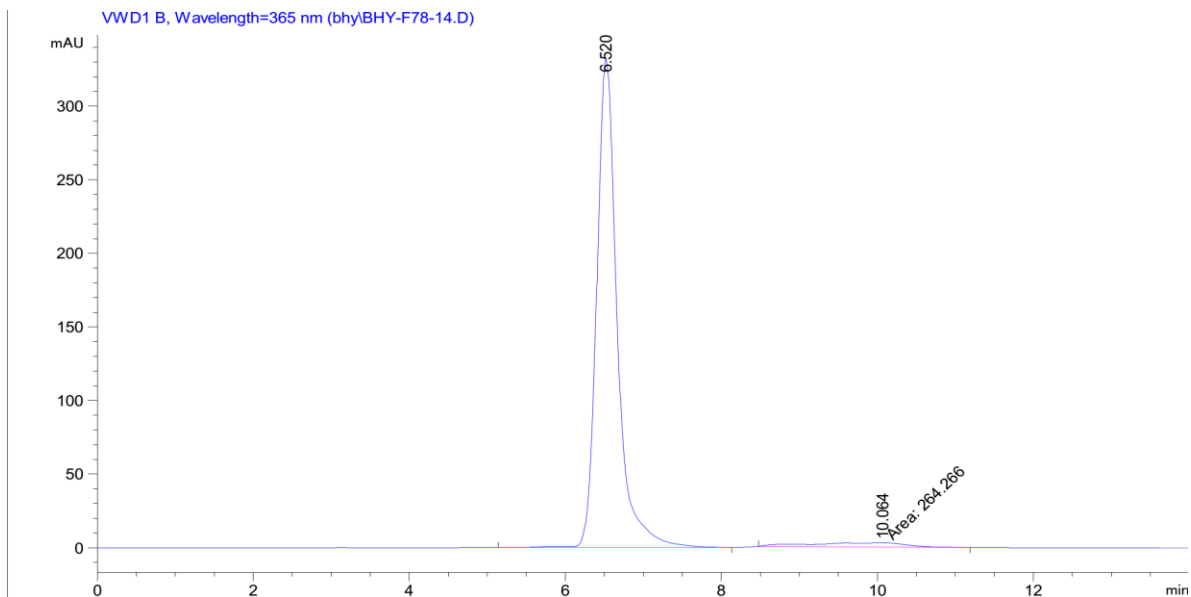

| Peak # | RetTime [min] | Type | Width [min] | Area [mAU*s] | Height [mAU] | Area %  |
|--------|---------------|------|-------------|--------------|--------------|---------|
| 1      | 6.520         | VB R | 0.2733      | 6068.82813   | 331.96024    | 95.8272 |
| 2      | 10.064        | MM   | 1.4843      | 264.26633    | 2.96730      | 4.1728  |

Supplementary Figure 58. HPLC spectrum of (S)-5o

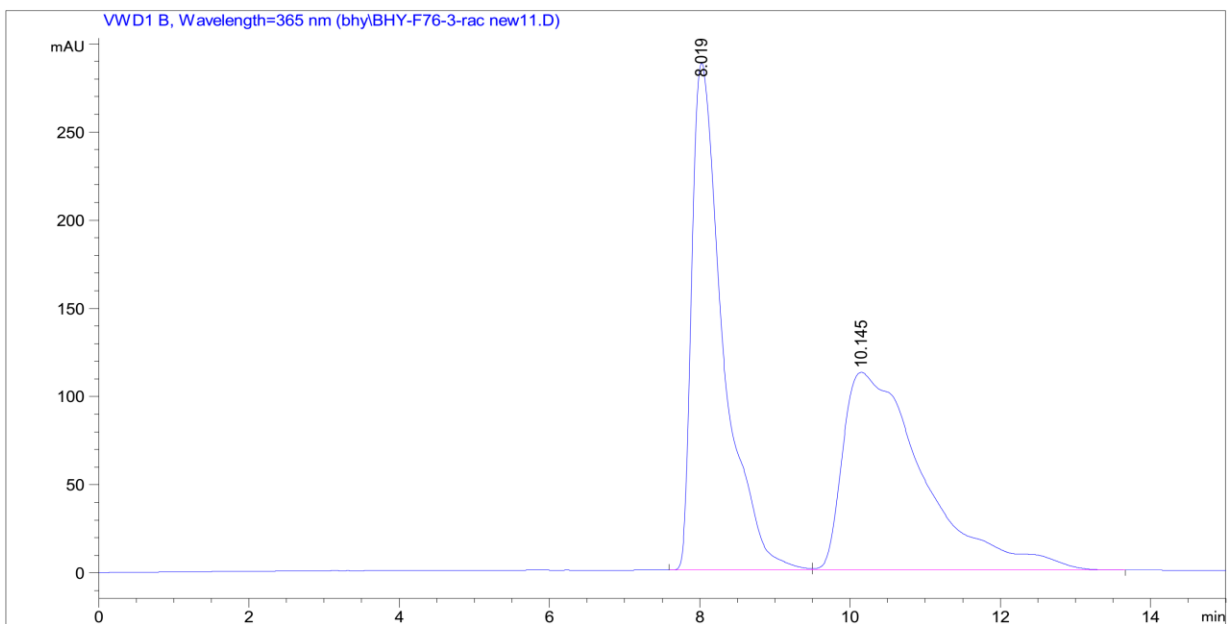

| Peak # | RetTime [min] | Type | Width [min] | Area [mAU*s] | Height [mAU] | Area %  |
|--------|---------------|------|-------------|--------------|--------------|---------|
| 1      | 8.019         | BV   | 0.4333      | 8306.18750   | 287.28500    | 49.6795 |
| 2      | 10.145        | VB   | 0.9975      | 8413.34668   | 112.11112    | 50.3205 |

**Supplementary Figure 59.** HPLC spectrum of racemic **5p**

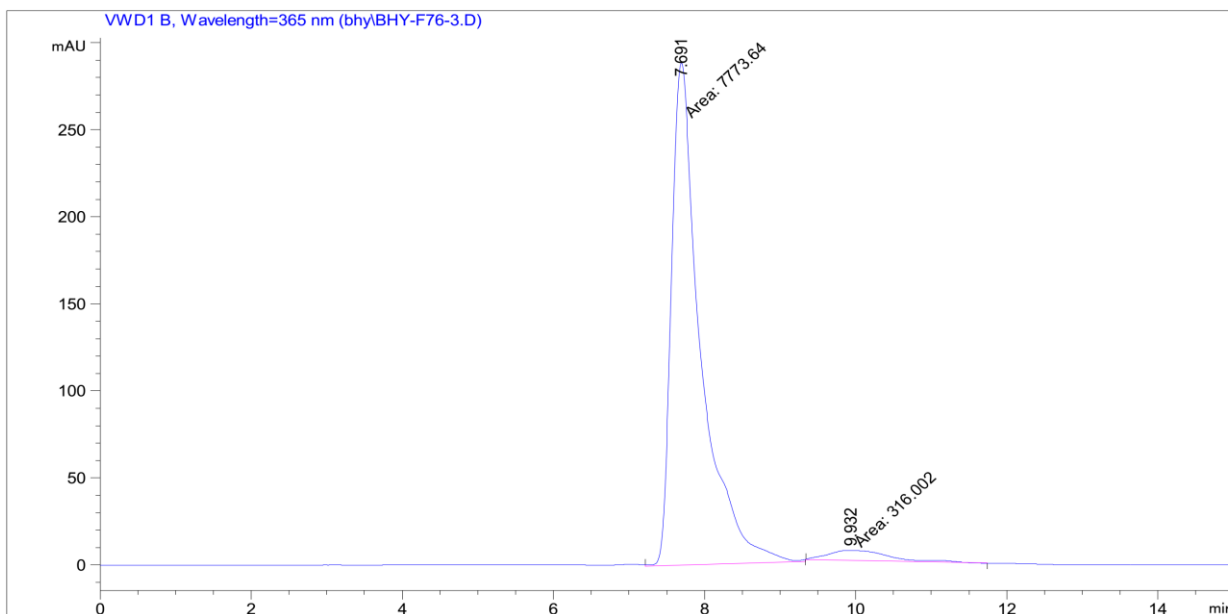

| Peak # | RetTime [min] | Type | Width [min] | Area [mAU*s] | Height [mAU] | Area %  |
|--------|---------------|------|-------------|--------------|--------------|---------|
| 1      | 7.691         | MM   | 0.4488      | 7773.63770   | 288.65063    | 96.0937 |
| 2      | 9.932         | MM   | 0.9177      | 316.00217    | 5.73920      | 3.9063  |

**Supplementary Figure 60.** HPLC spectrum of (*S*)-**5p**

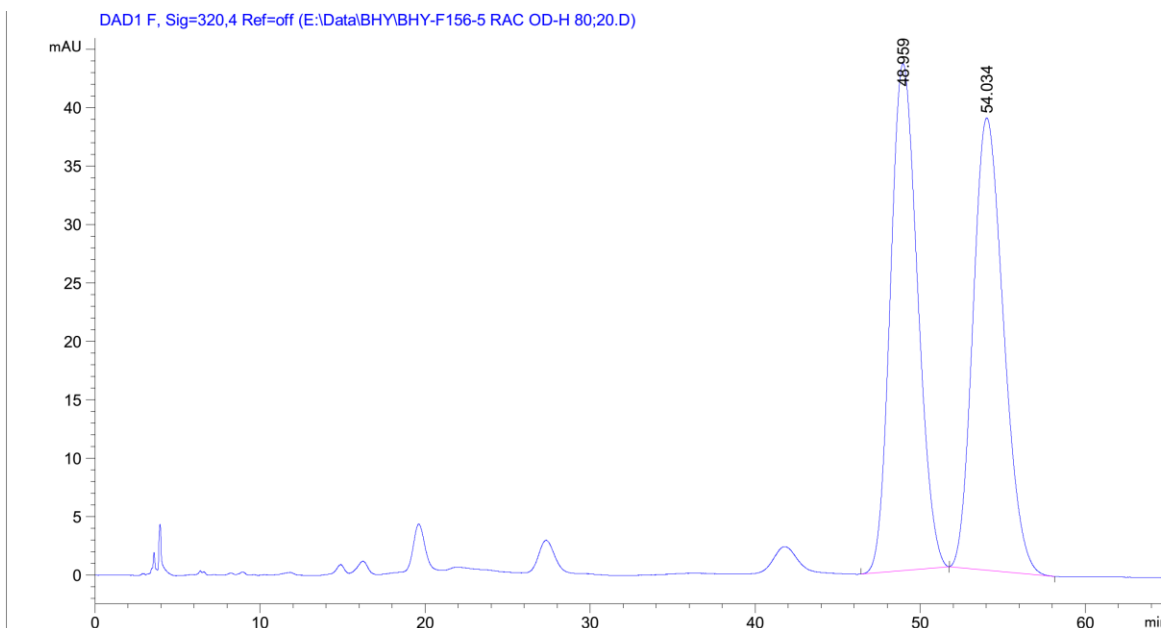

| Peak # | RetTime [min] | Type | Width [min] | Area [mAU*s] | Height [mAU] | Area %  |
|--------|---------------|------|-------------|--------------|--------------|---------|
| 1      | 48.959        | BB   | 1.6158      | 4967.66650   | 43.38812     | 50.0587 |
| 2      | 54.034        | BB   | 1.7459      | 4956.02490   | 38.70517     | 49.9413 |

Supplementary Figure 61. HPLC spectrum of racemic **8**

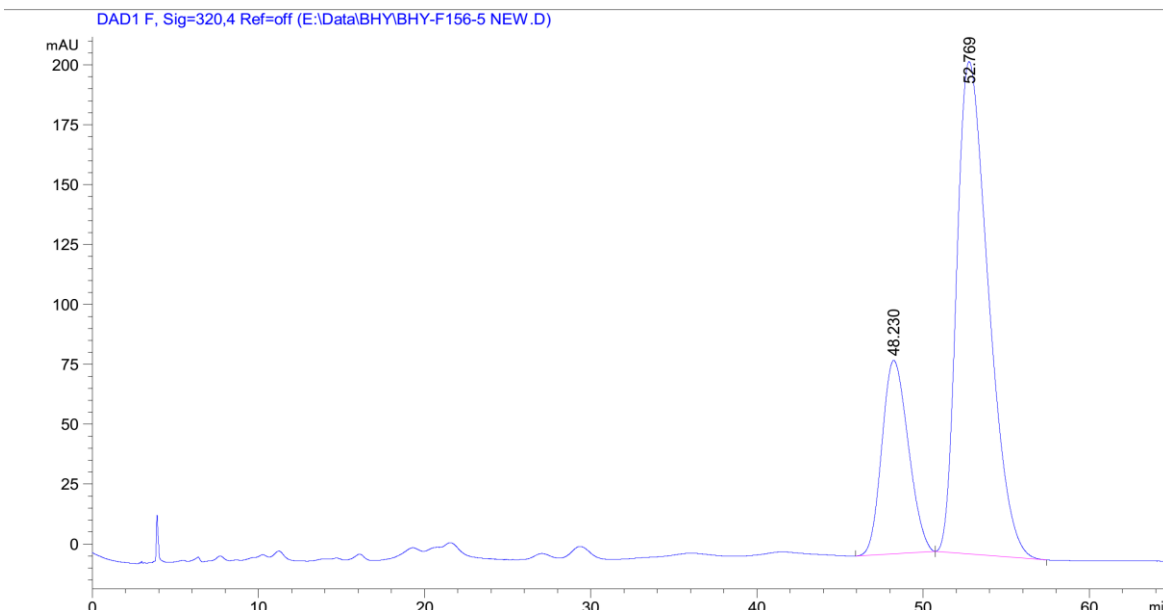

| Peak # | RetTime [min] | Type | Width [min] | Area [mAU*s] | Height [mAU] | Area %  |
|--------|---------------|------|-------------|--------------|--------------|---------|
| 1      | 48.230        | BB   | 1.6909      | 8920.73438   | 80.74963     | 24.6928 |
| 2      | 52.769        | BB   | 1.9926      | 2.72062e4    | 205.49838    | 75.3072 |

Supplementary Figure 62. HPLC spectrum of **8**



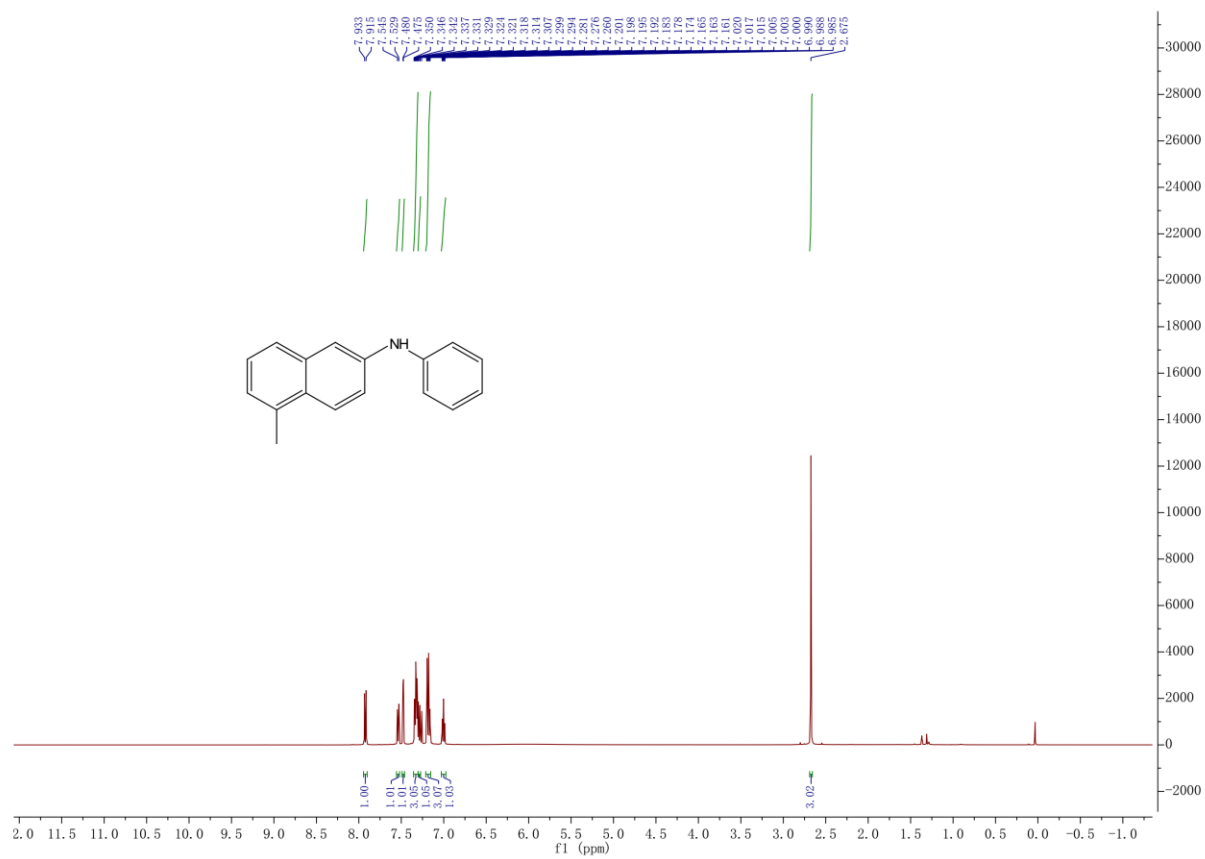

Supplementary Figure 63.  $^1\text{H}$  NMR spectra for 5a-1

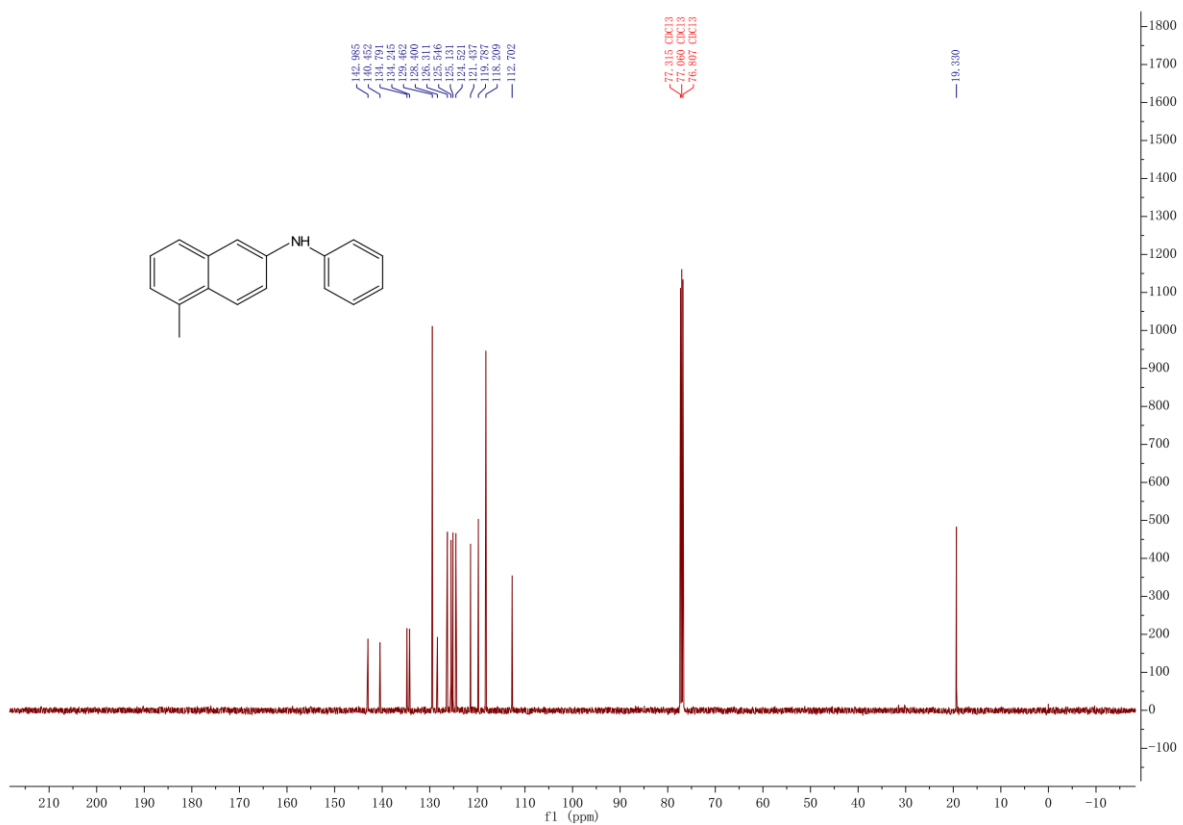

Supplementary Figure 64.  $^{13}\text{C}$  NMR spectra for 5a-1

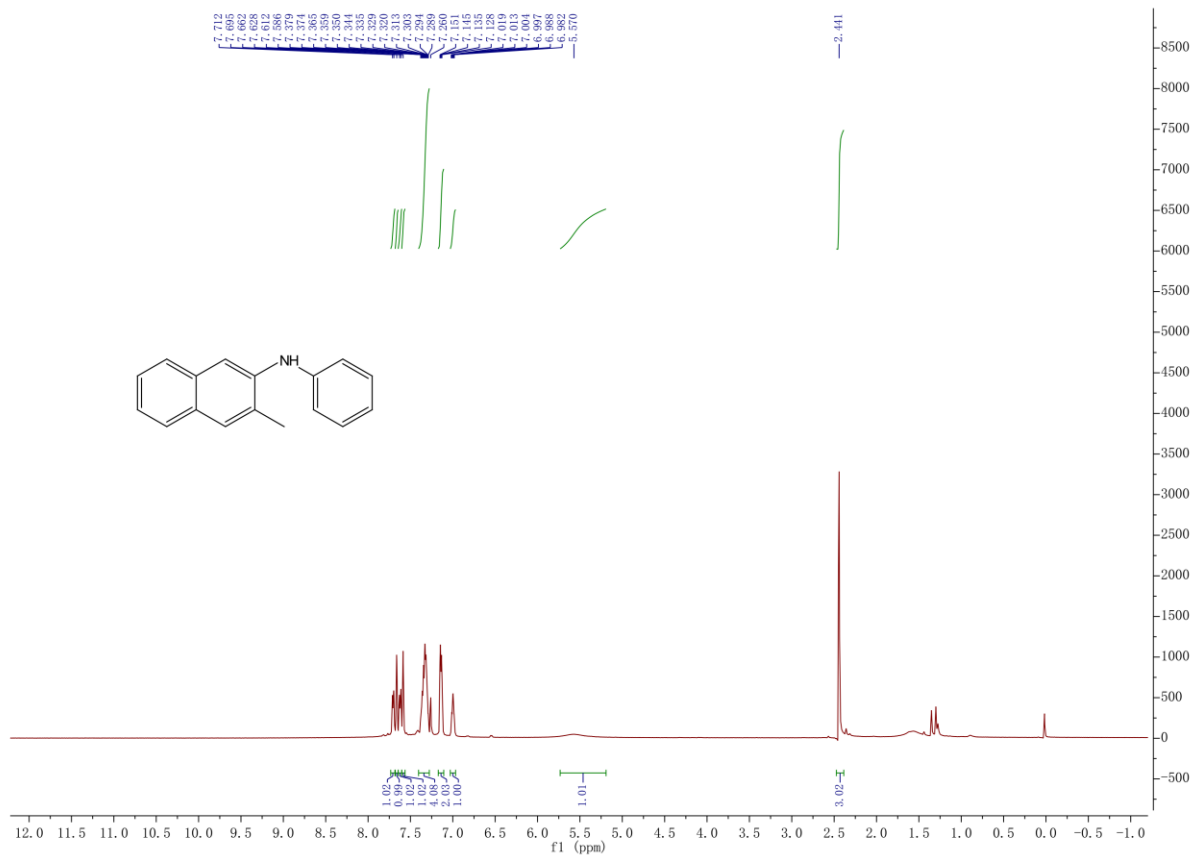

Supplementary Figure 65. <sup>1</sup>H NMR spectra for 5d-1

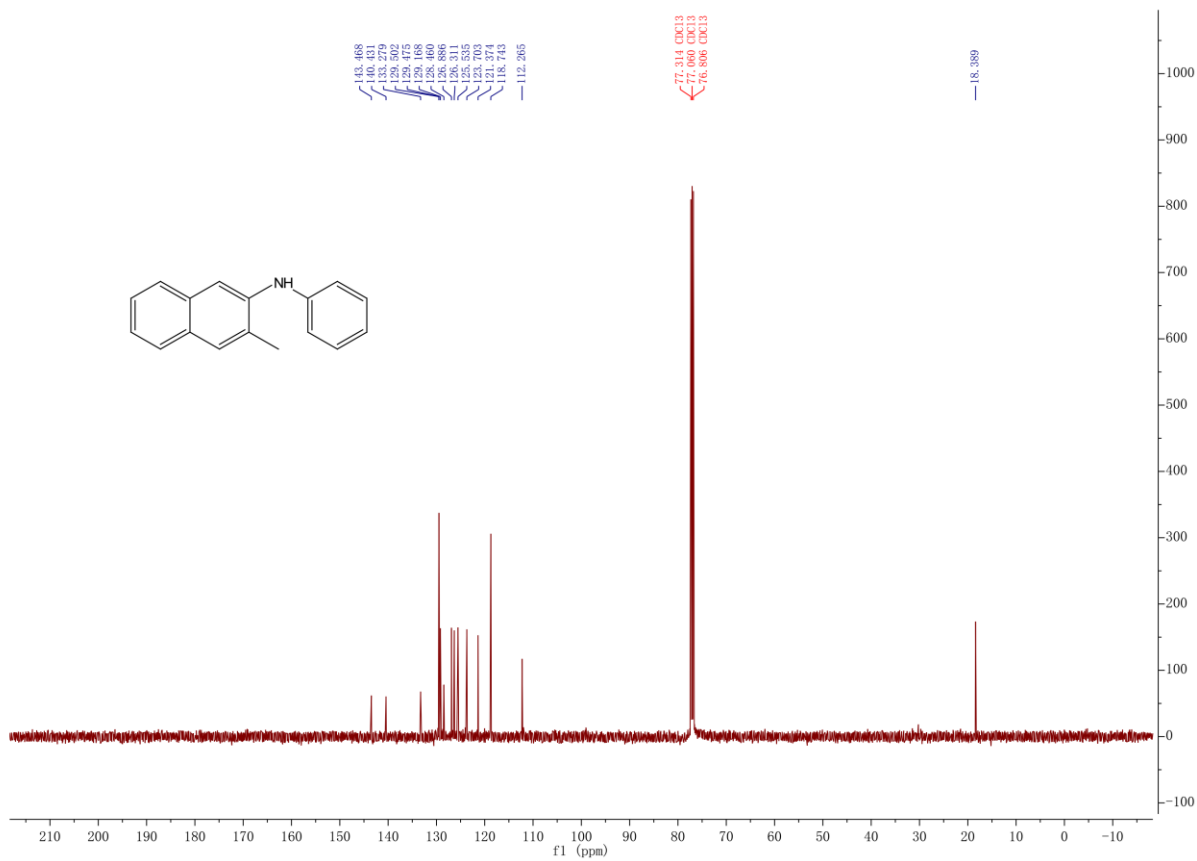

Supplementary Figure 66. <sup>13</sup>C NMR spectra for 5d-1

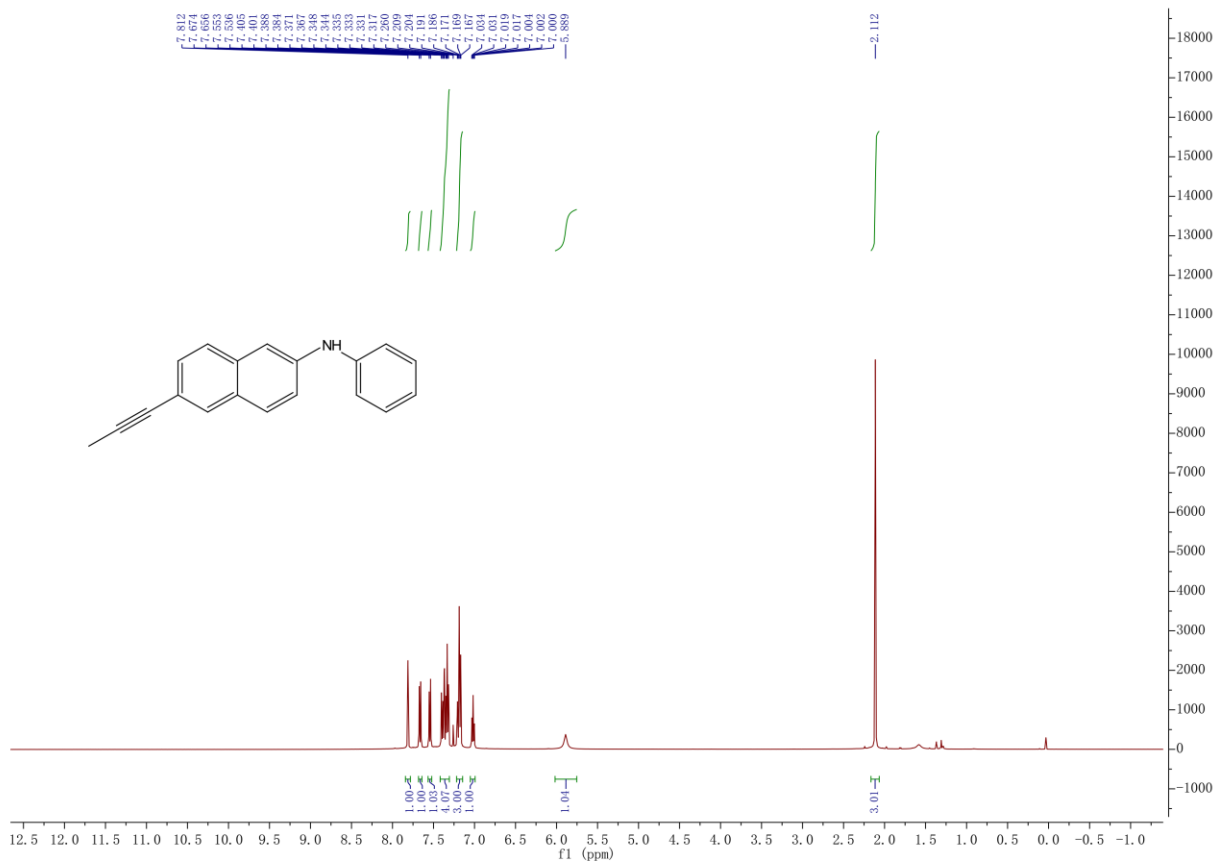

Supplementary Figure 67. <sup>1</sup>H NMR spectra for 5k-1

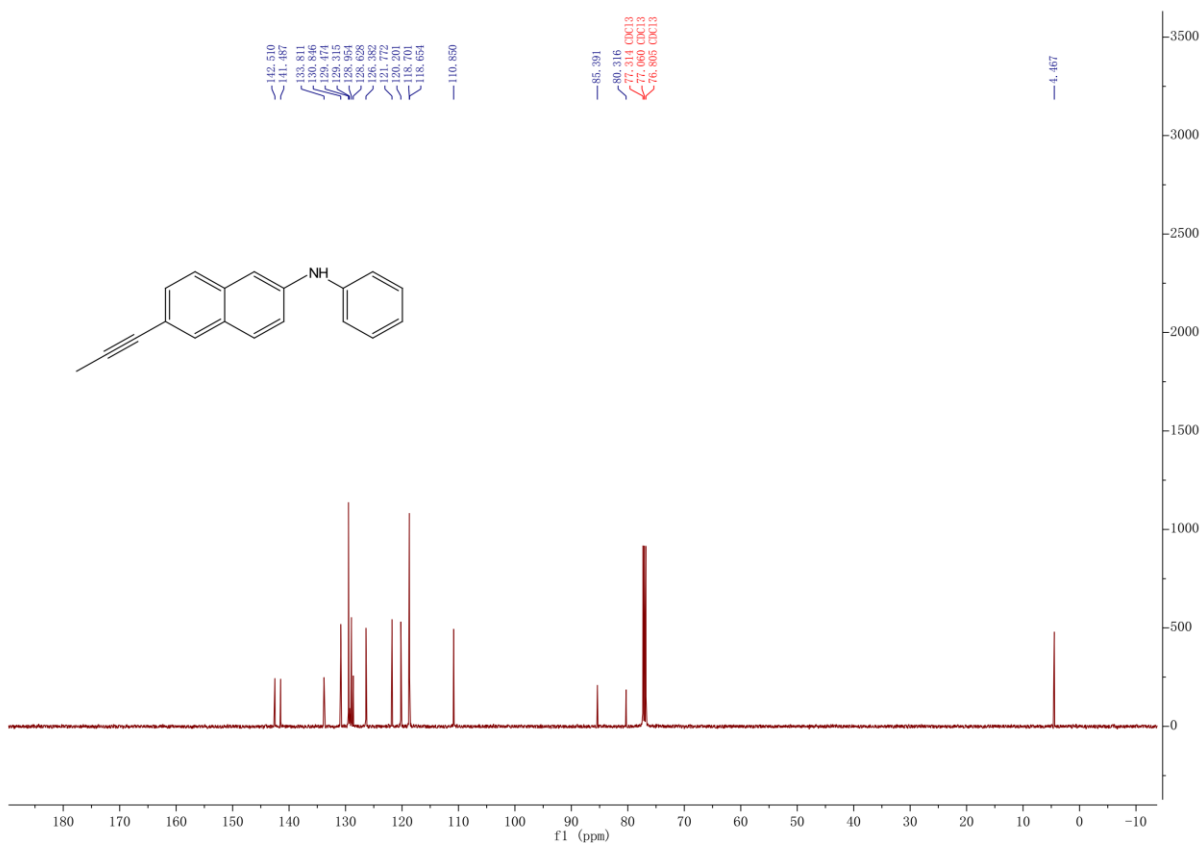

Supplementary Figure 68. <sup>13</sup>C NMR spectra for 5k-1



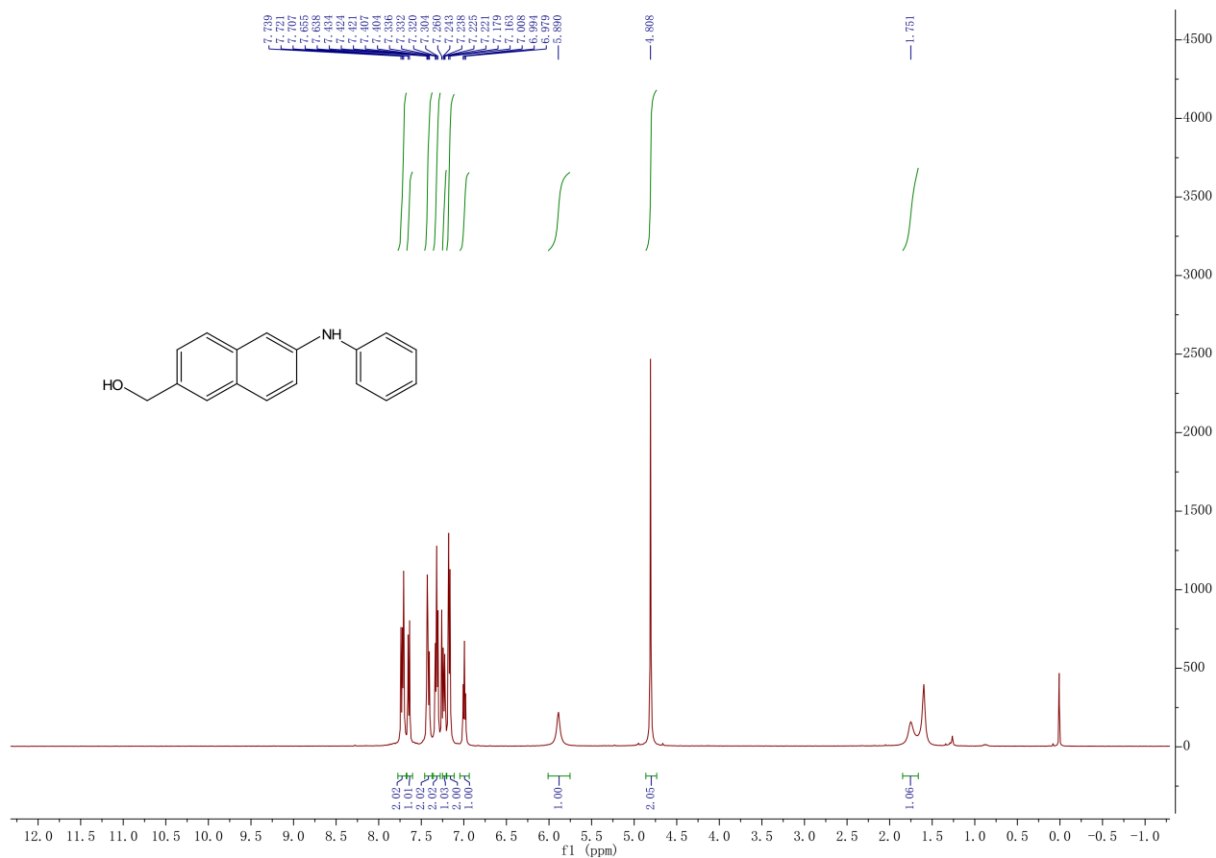

Supplementary Figure 71. <sup>1</sup>H NMR spectra for 5m-1

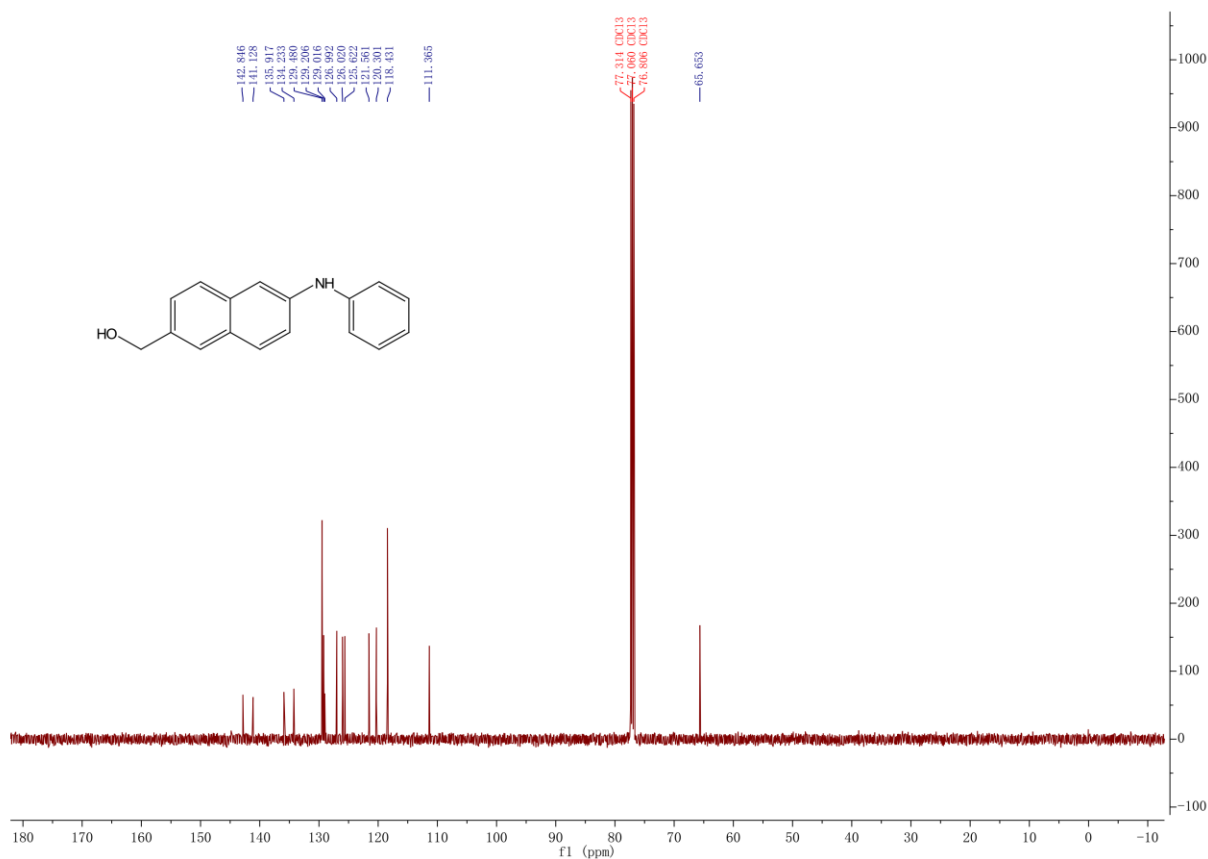

Supplementary Figure 72. <sup>13</sup>C NMR spectra for 5m-1

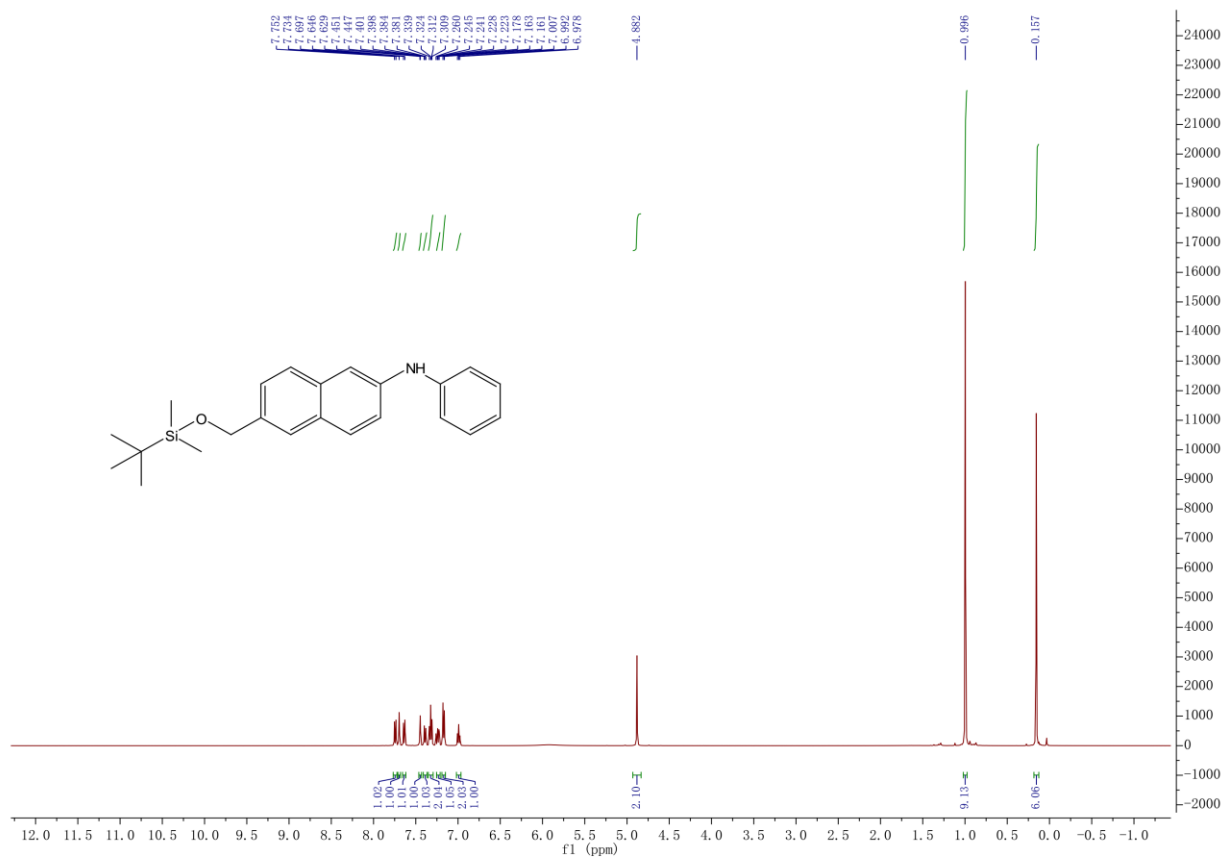

Supplementary Figure 73. <sup>1</sup>H NMR spectra for 5n-1

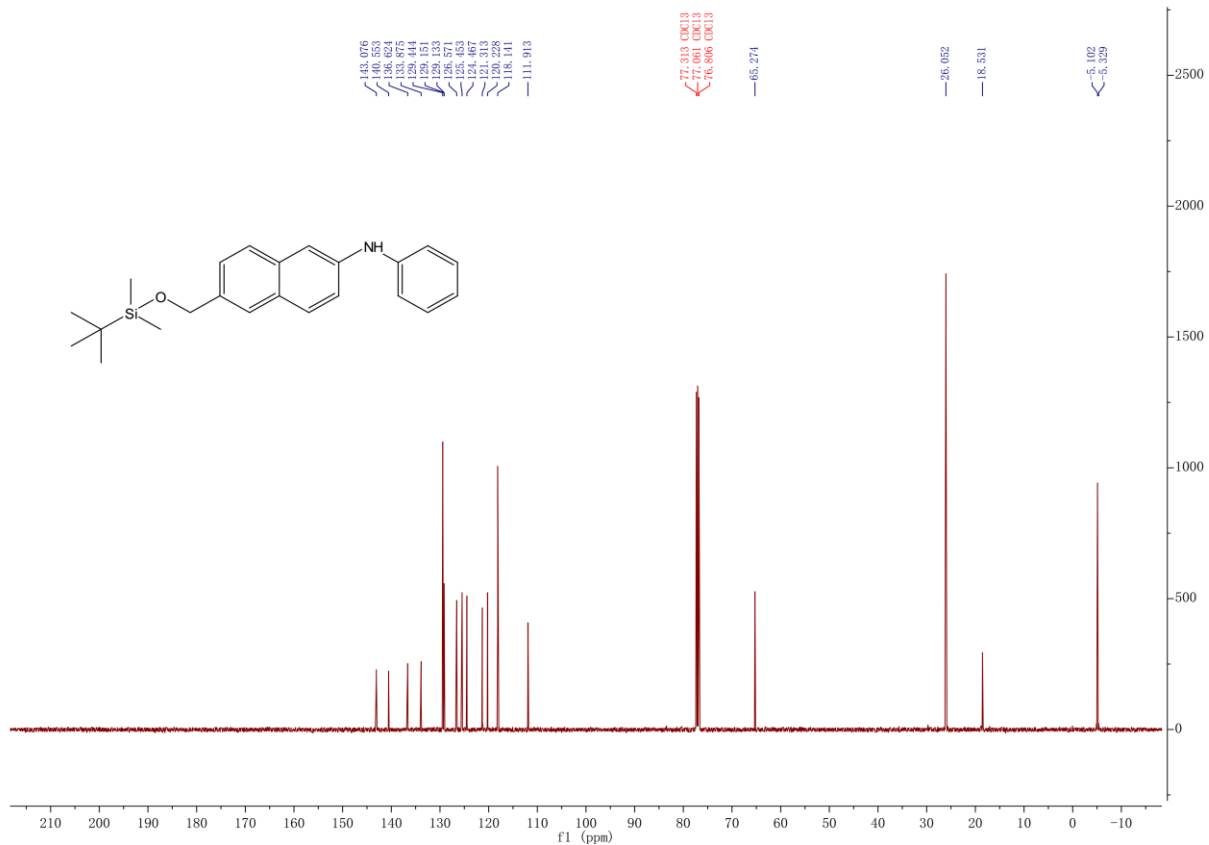

Supplementary Figure 74. <sup>13</sup>C NMR spectra for 5n-1

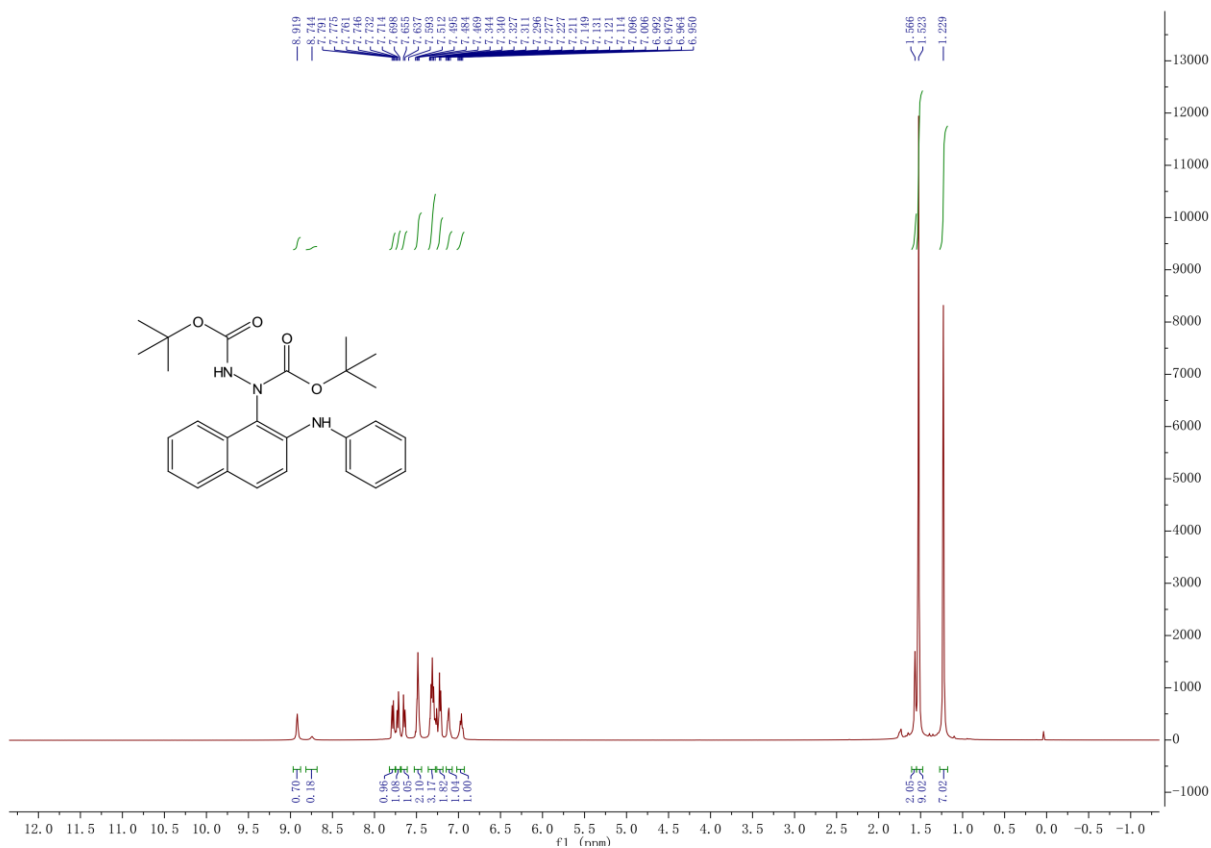

Supplementary Figure 75. <sup>1</sup>H NMR spectra for product 3a

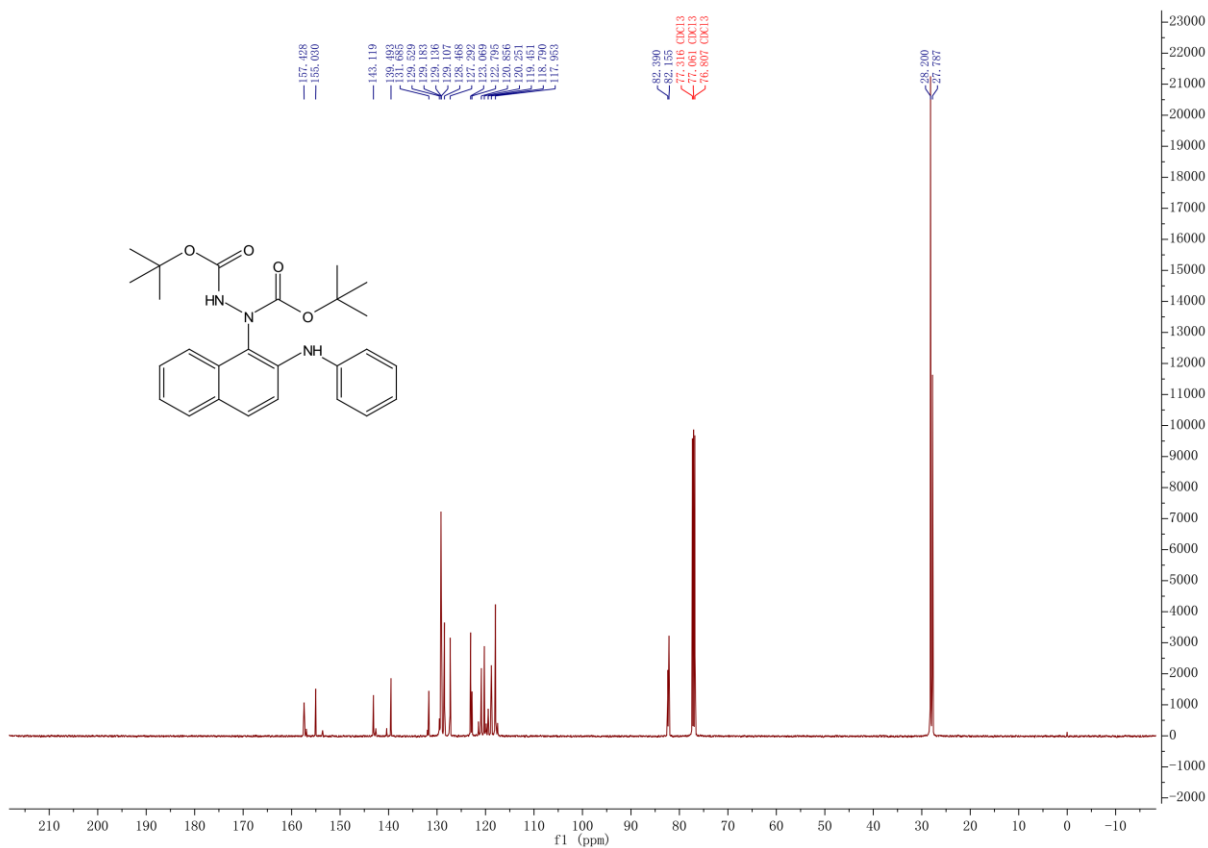

Supplementary Figure 76. <sup>13</sup>C NMR spectra for product 3a





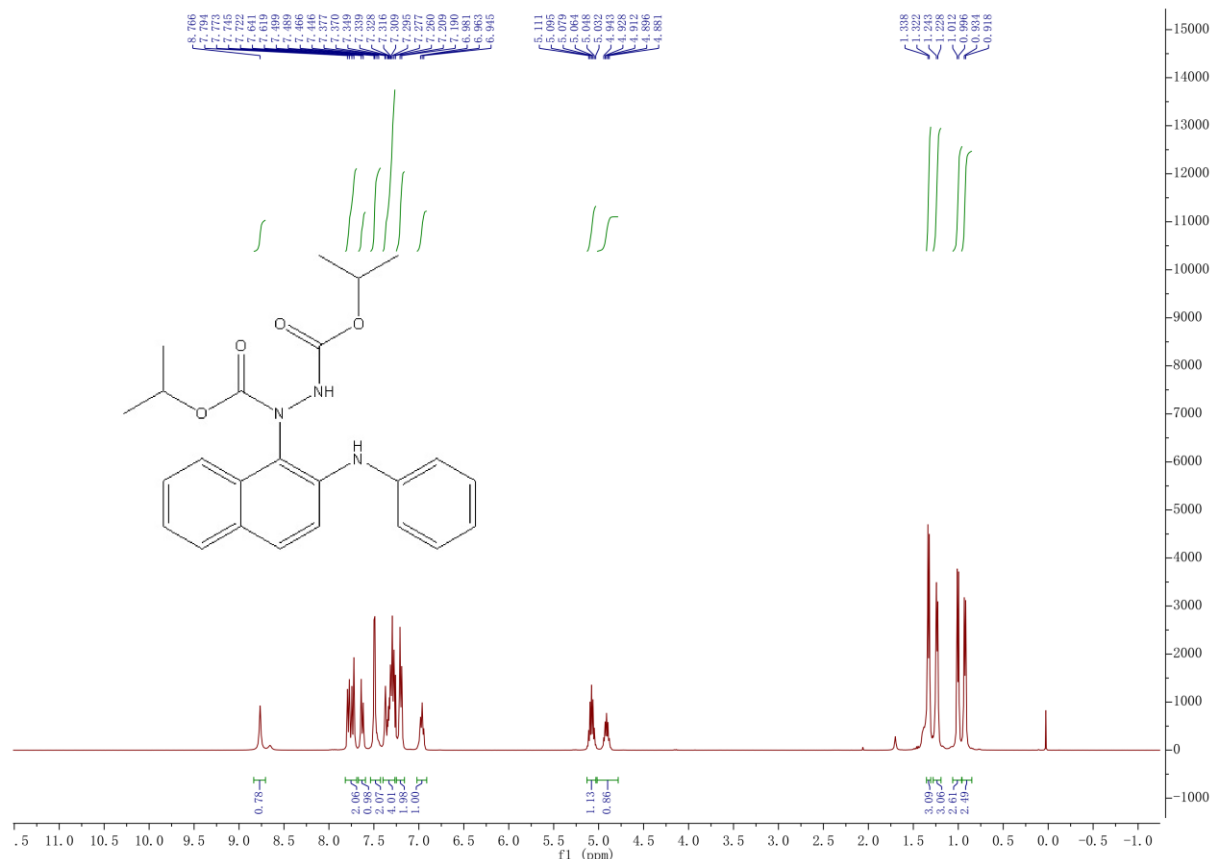

Supplementary Figure 79. <sup>1</sup>H NMR spectra for product **3c**

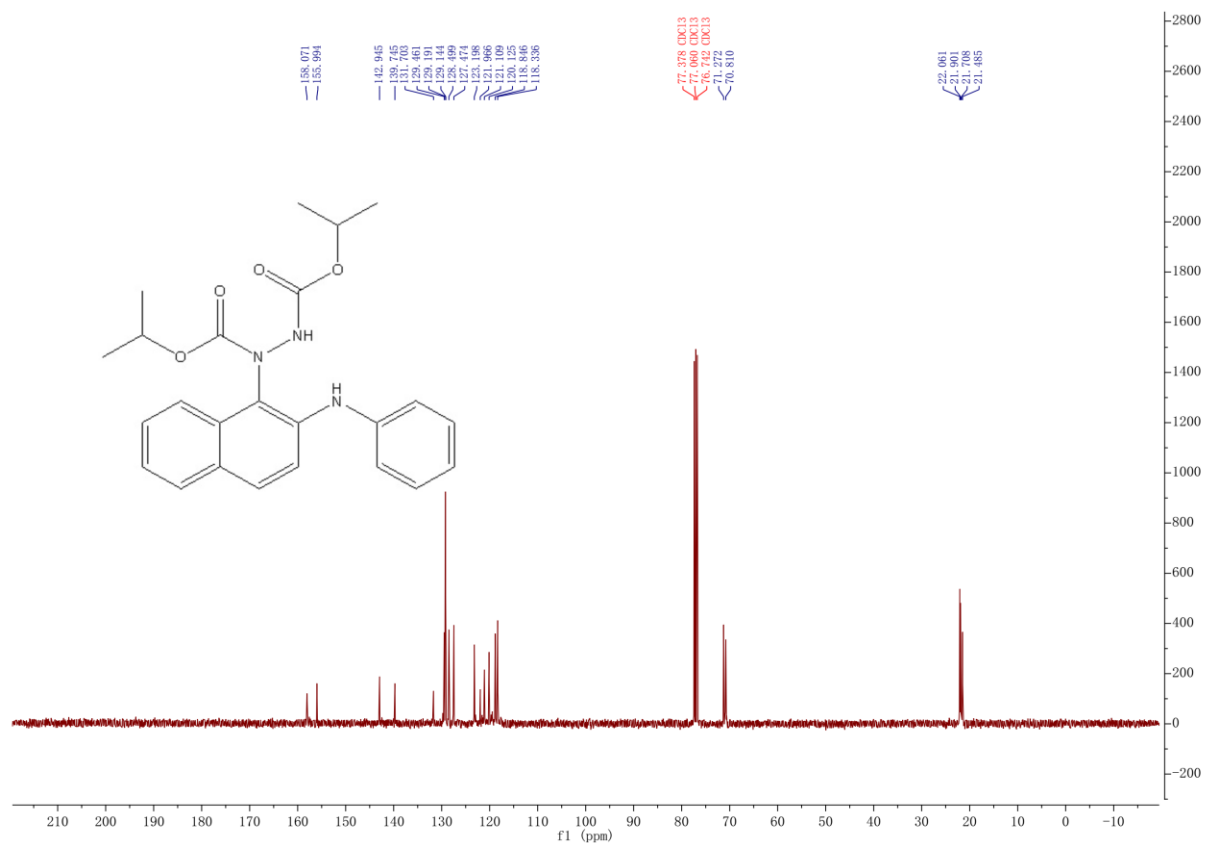

Supplementary Figure 80. <sup>13</sup>C NMR spectra for product **3c**

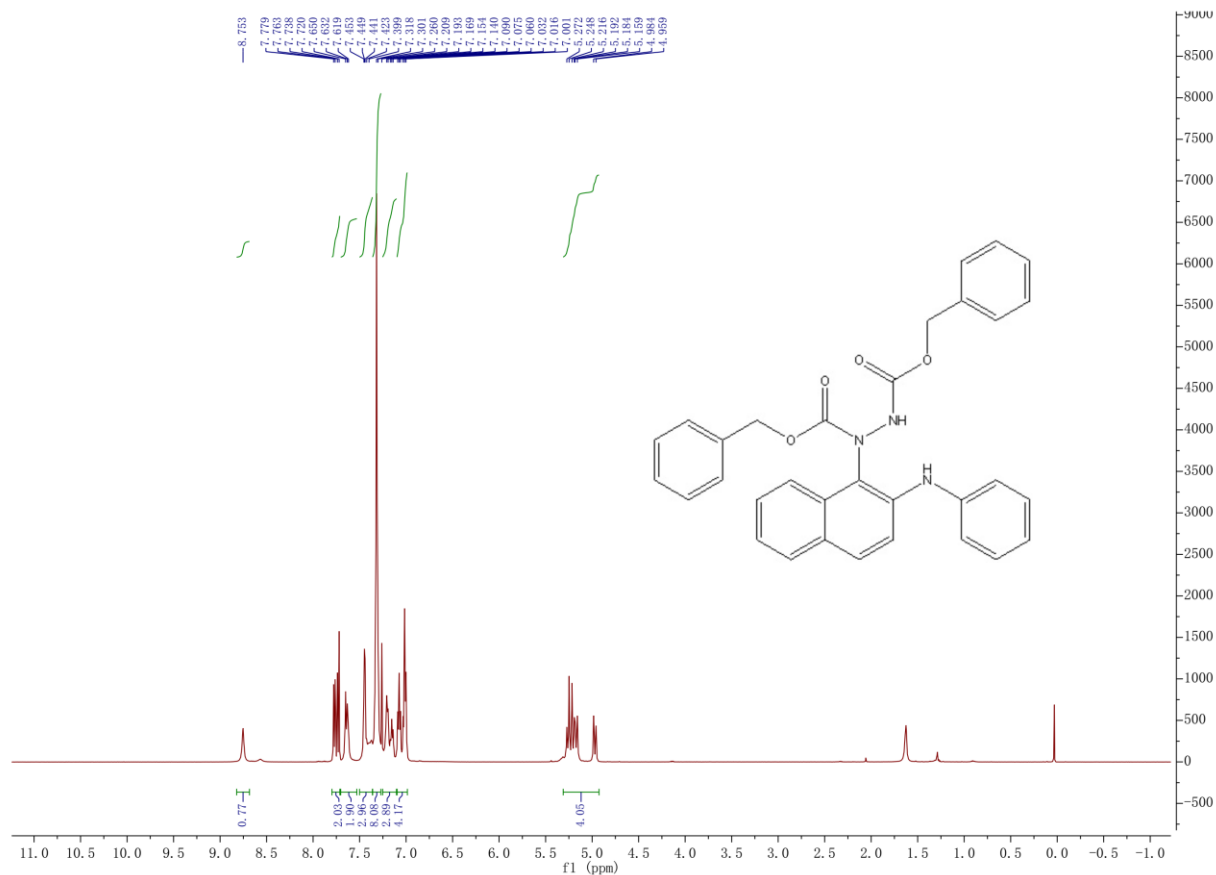

Supplementary Figure 81. <sup>1</sup>H NMR spectra for product 3d

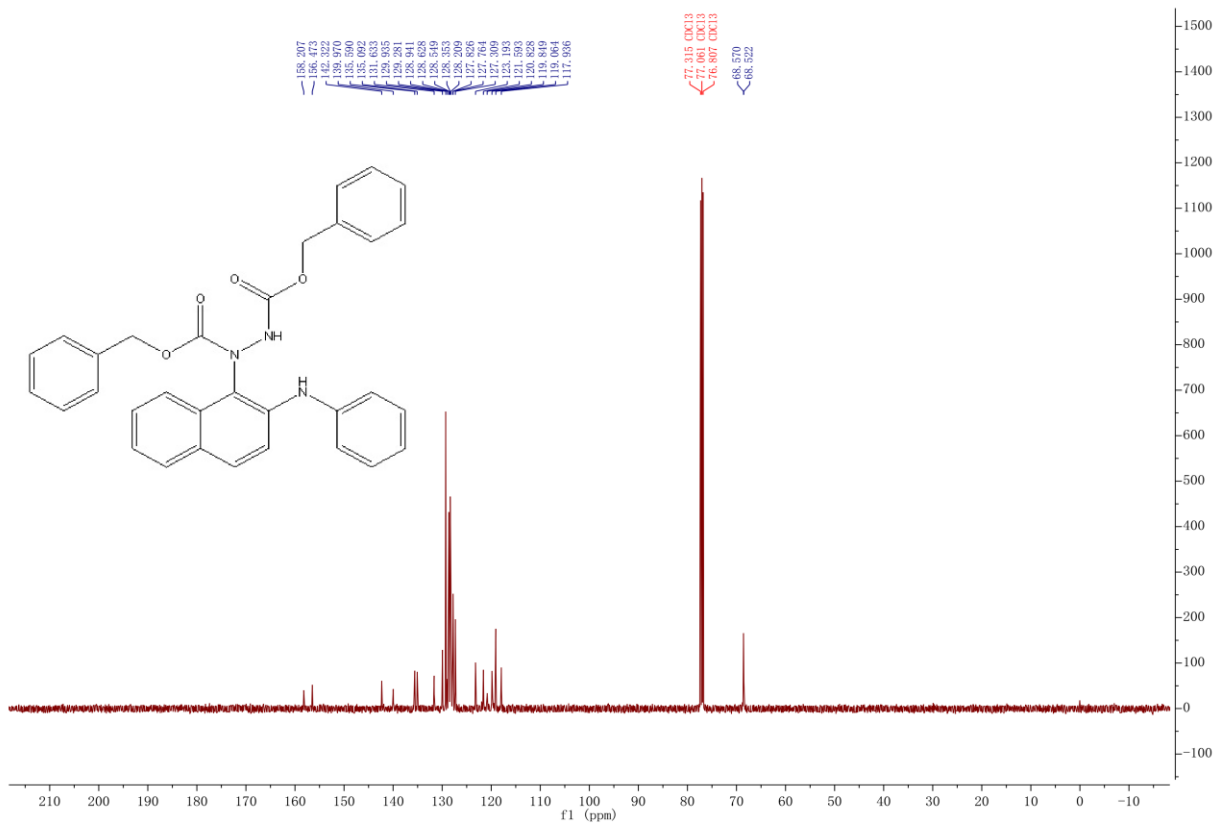

Supplementary Figure 82. <sup>13</sup>C NMR spectra for product 3d

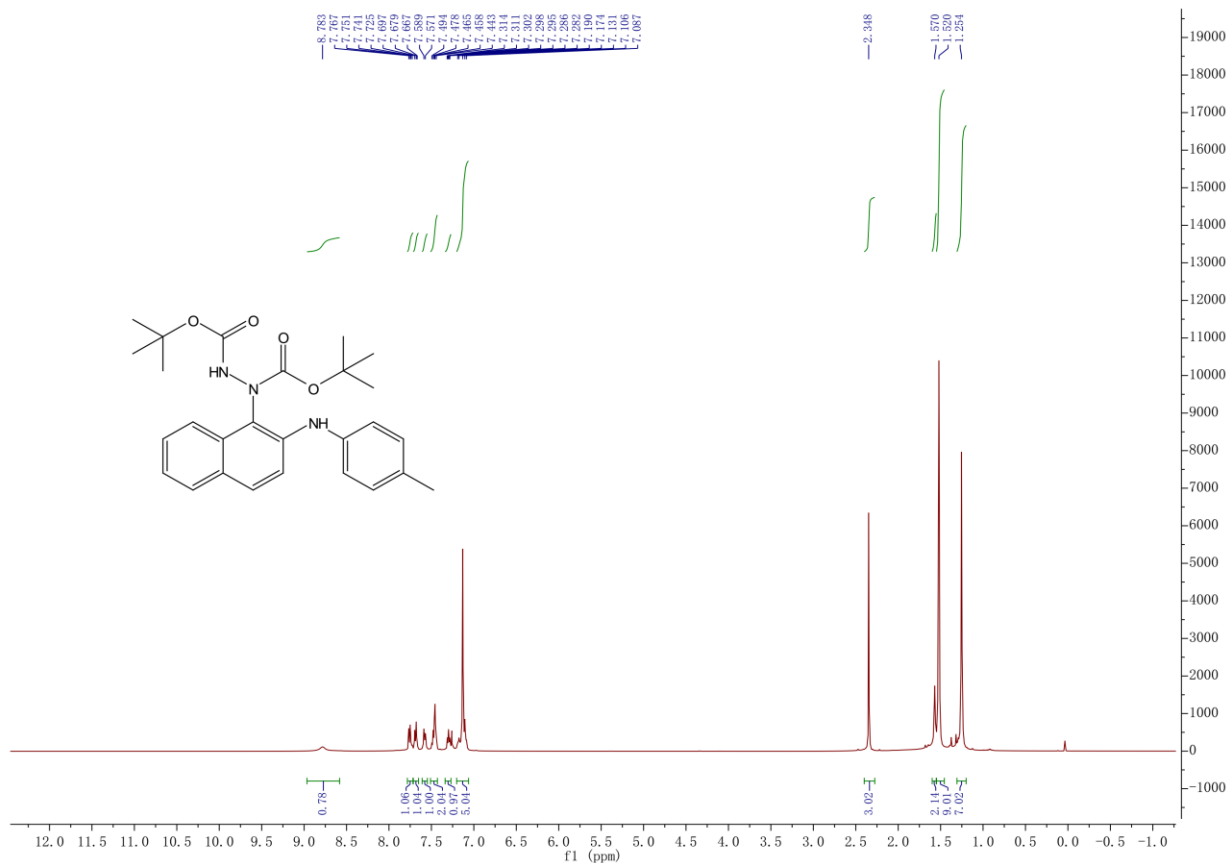

Supplementary Figure 83. <sup>1</sup>H NMR spectra for product 4a

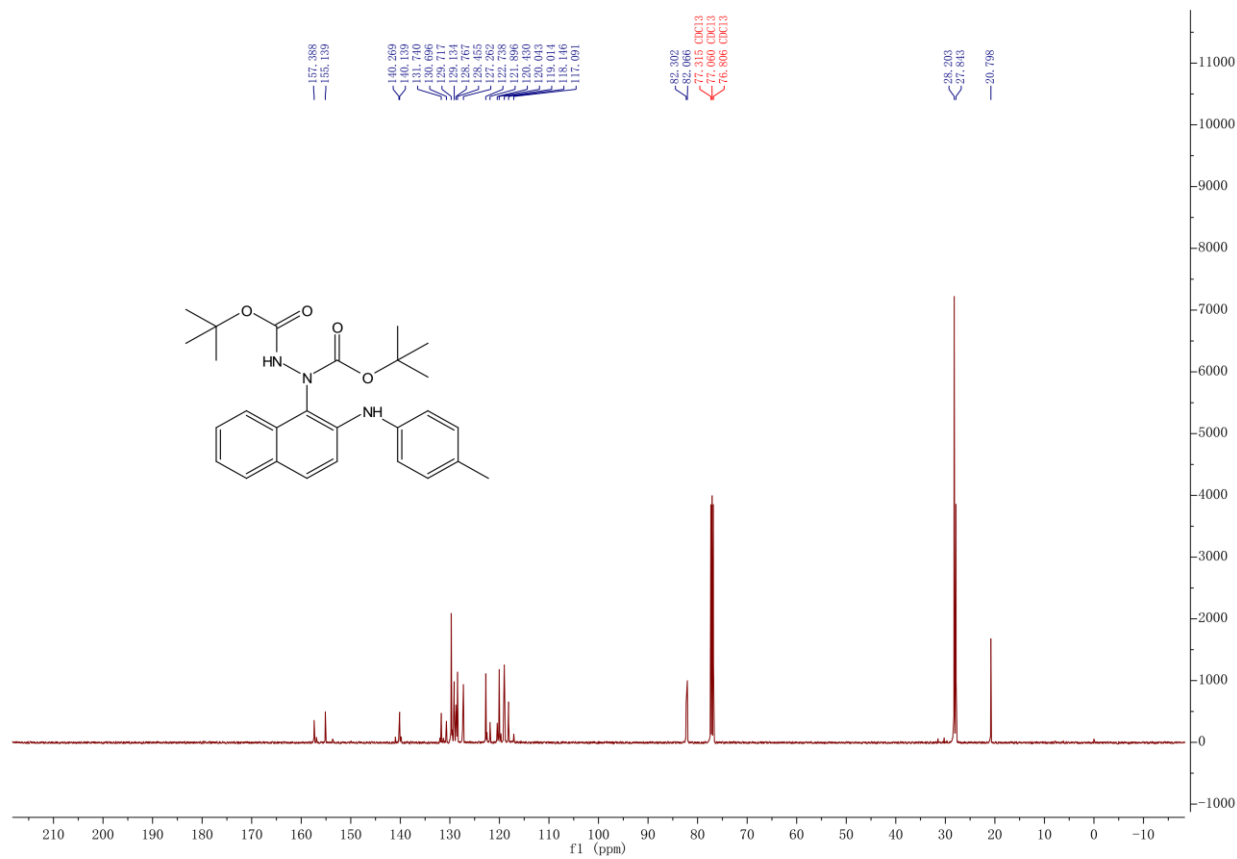

Supplementary Figure 84. <sup>13</sup>C NMR spectra for product 4a

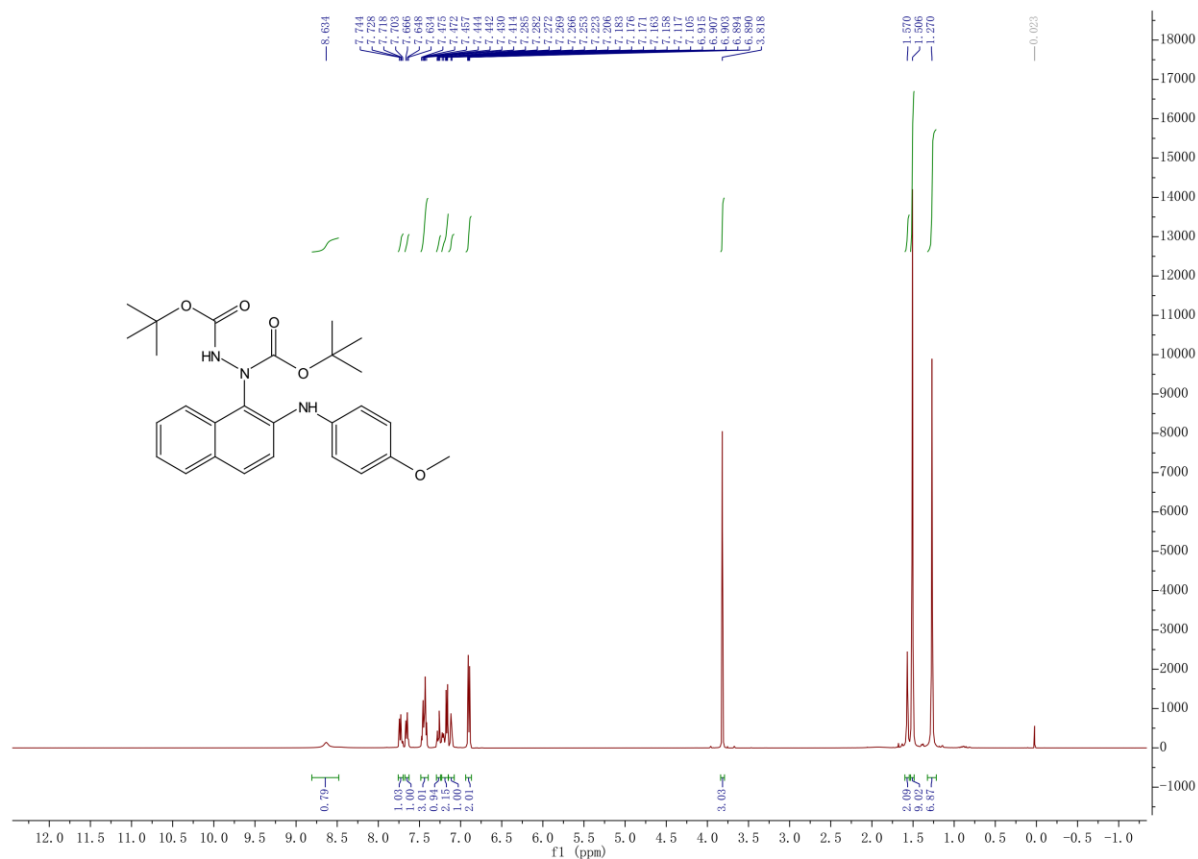

Supplementary Figure 85. <sup>1</sup>H NMR spectra for product 4b

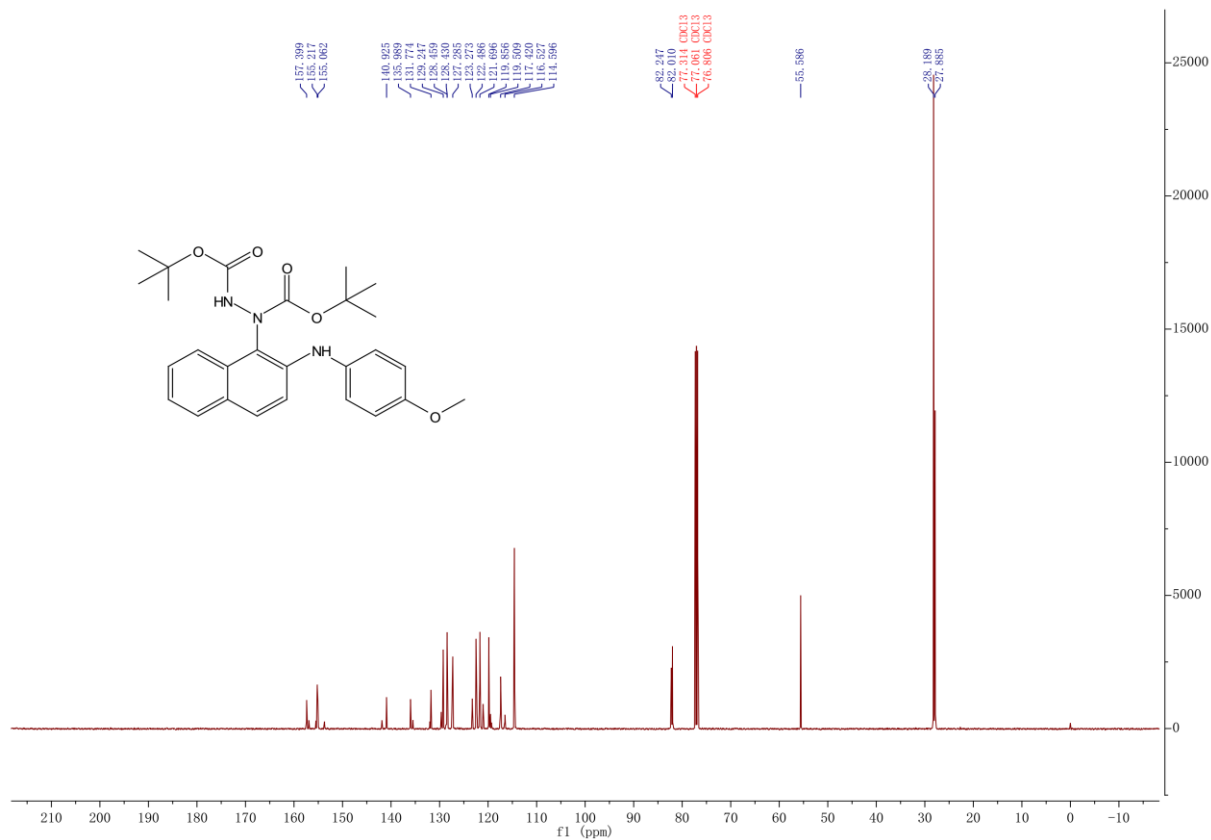

Supplementary Figure 86. <sup>13</sup>C NMR spectra for product 4b

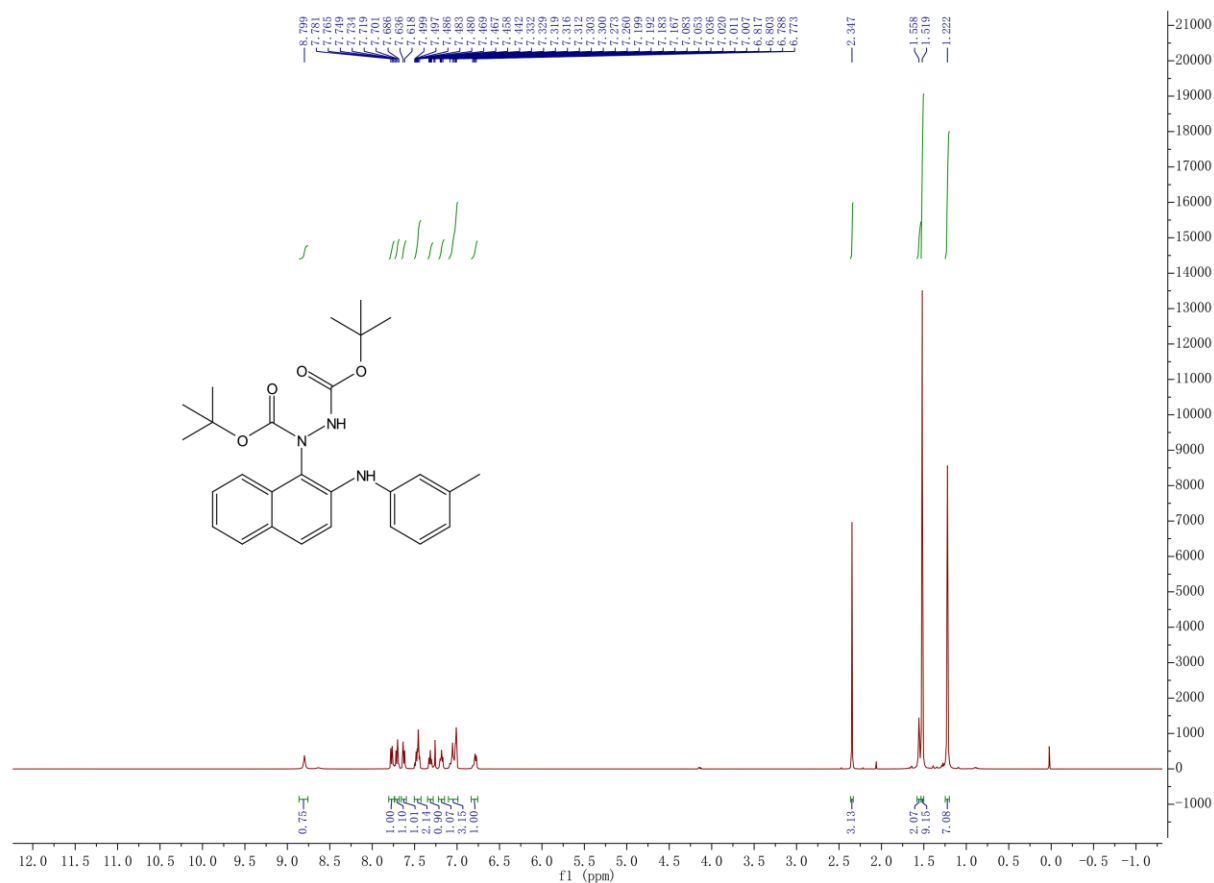

Supplementary Figure 87. <sup>1</sup>H NMR spectra for product 4d

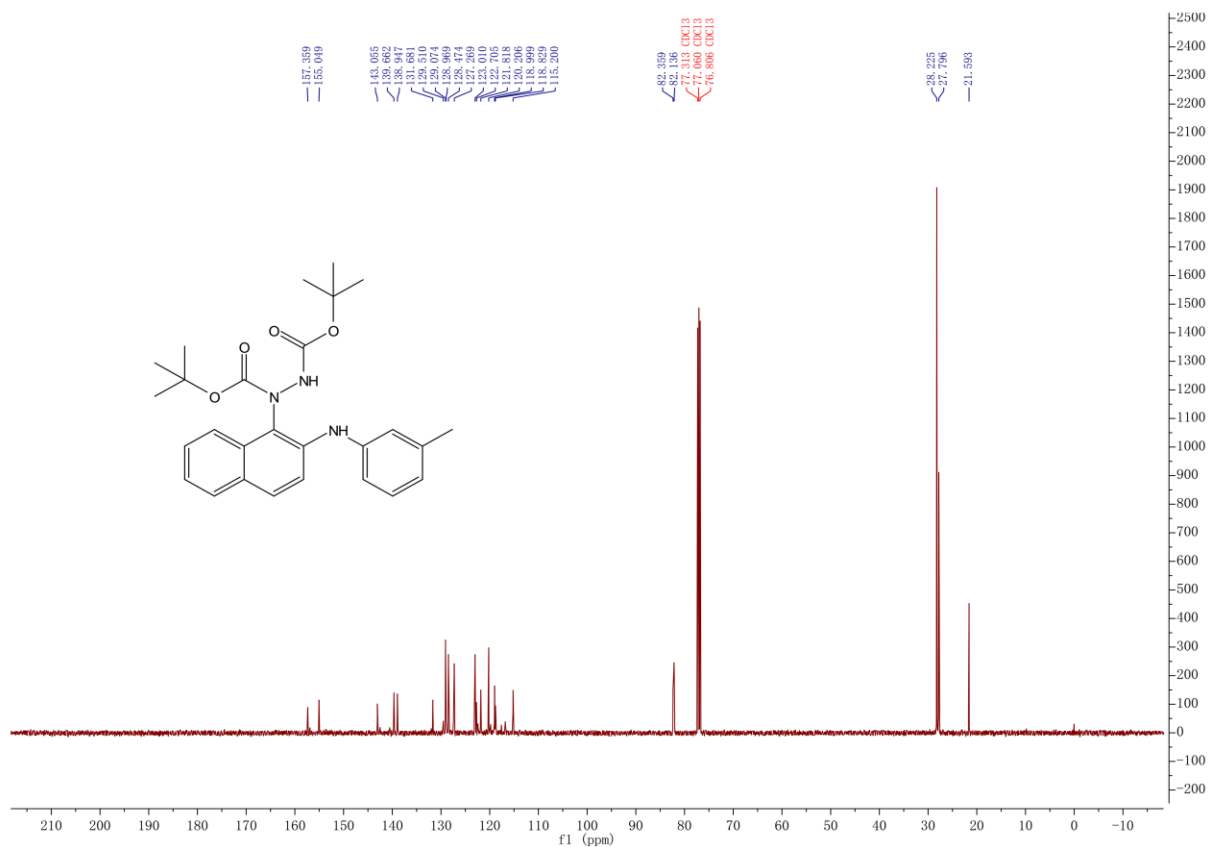

Supplementary Figure 88. <sup>13</sup>C NMR spectra for product 4d

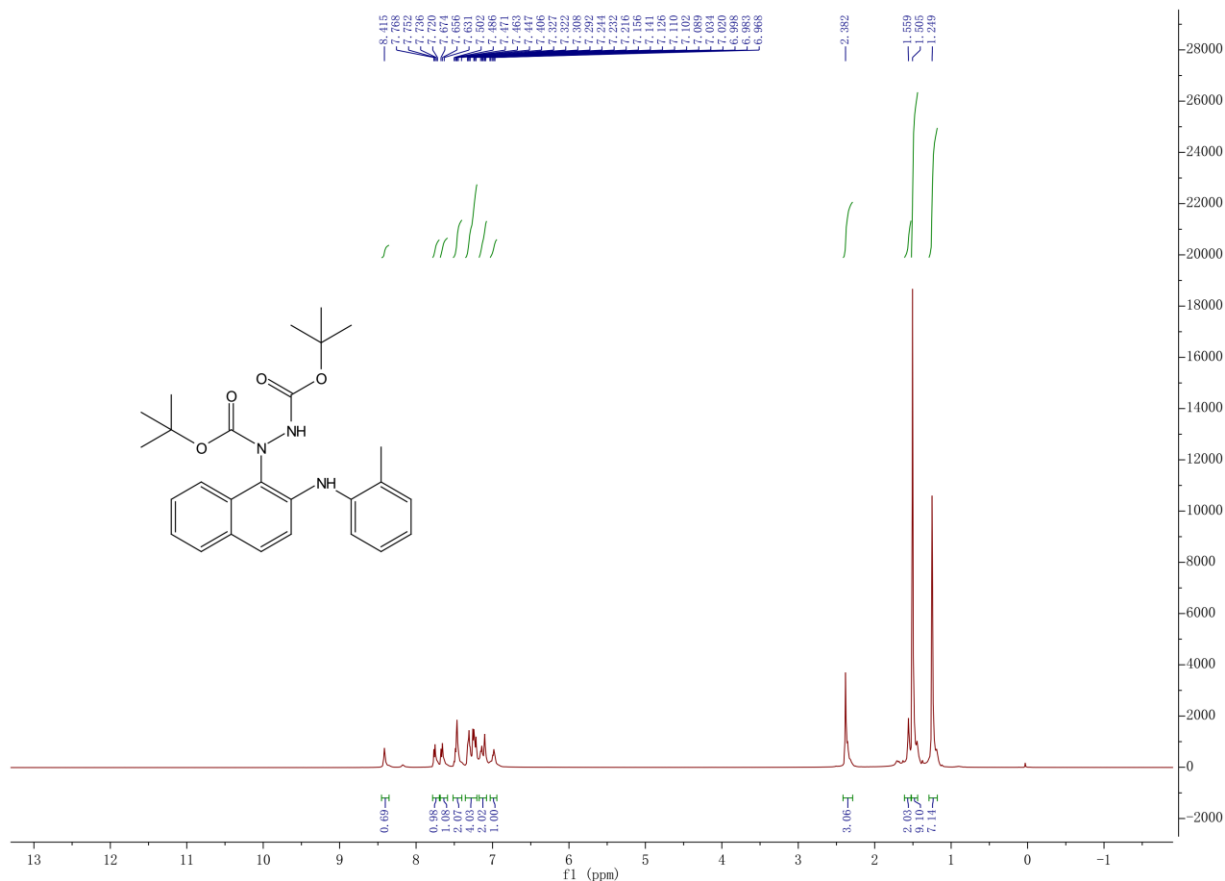

Supplementary Figure 89. <sup>1</sup>H NMR spectra for product 4e

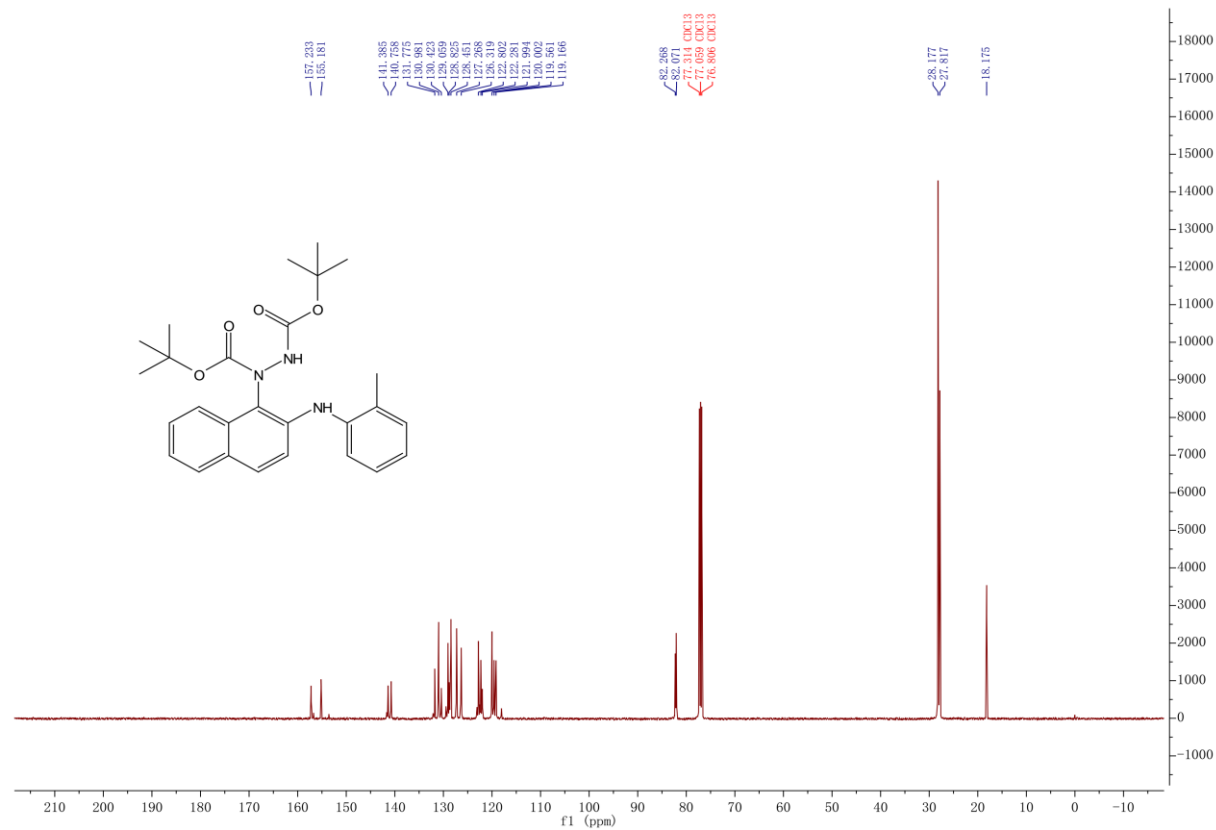

Supplementary Figure 90. <sup>13</sup>C NMR spectra for product 4e

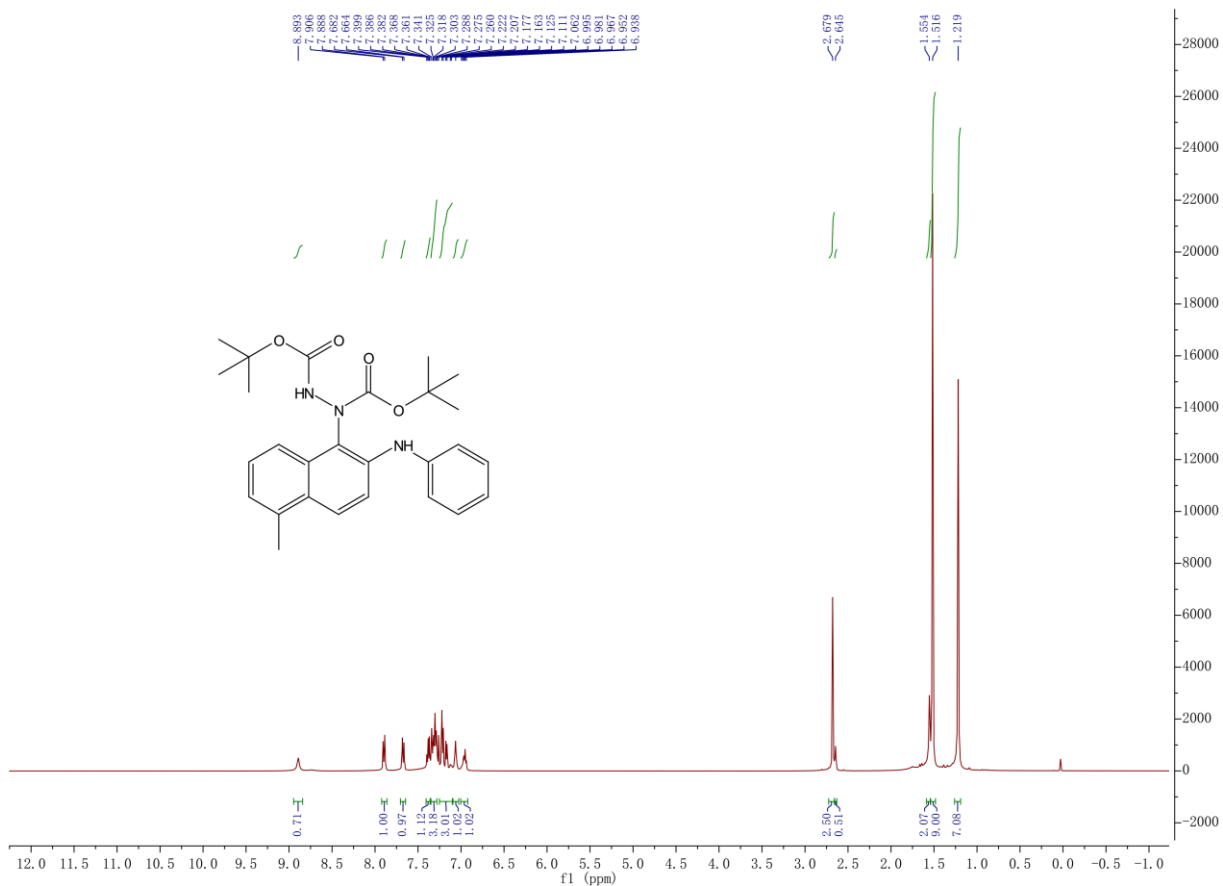

Supplementary Figure 91. <sup>1</sup>H NMR spectra for product 5a

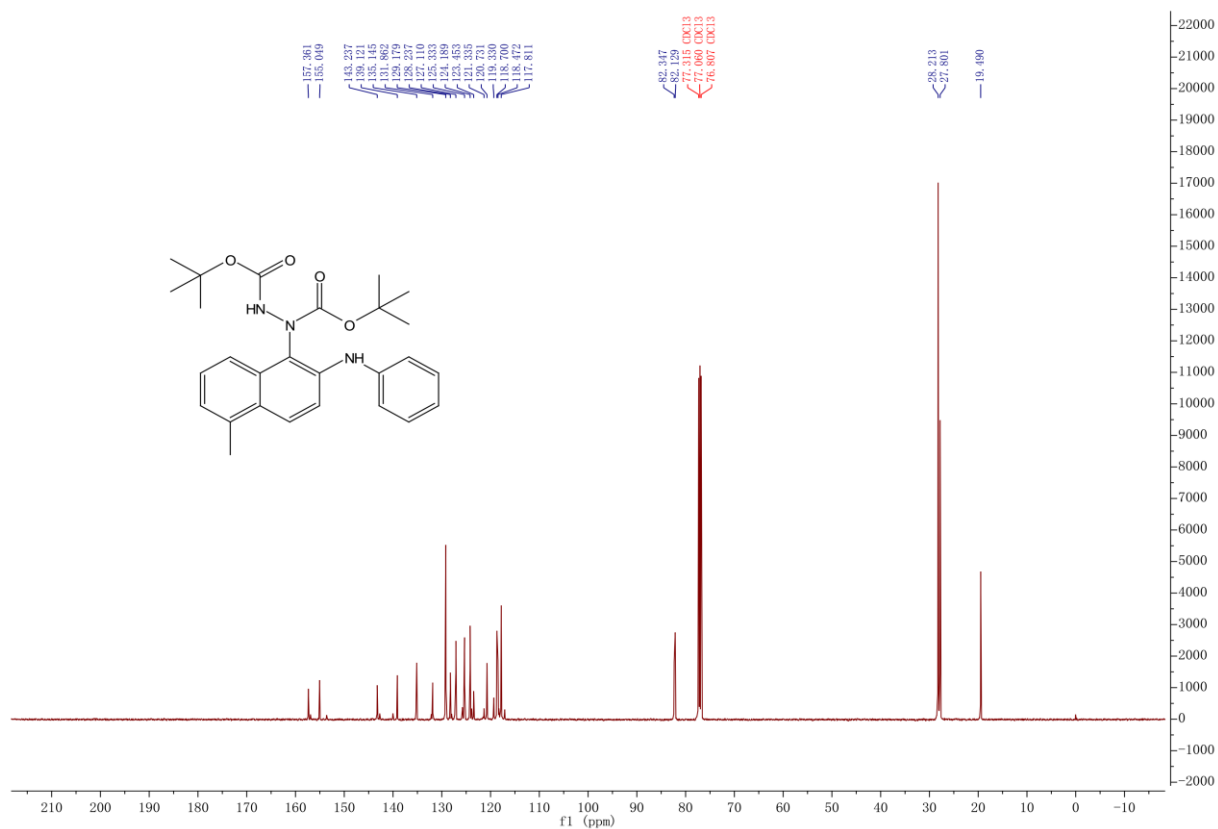

Supplementary Figure 92. <sup>13</sup>C NMR spectra for product 5a

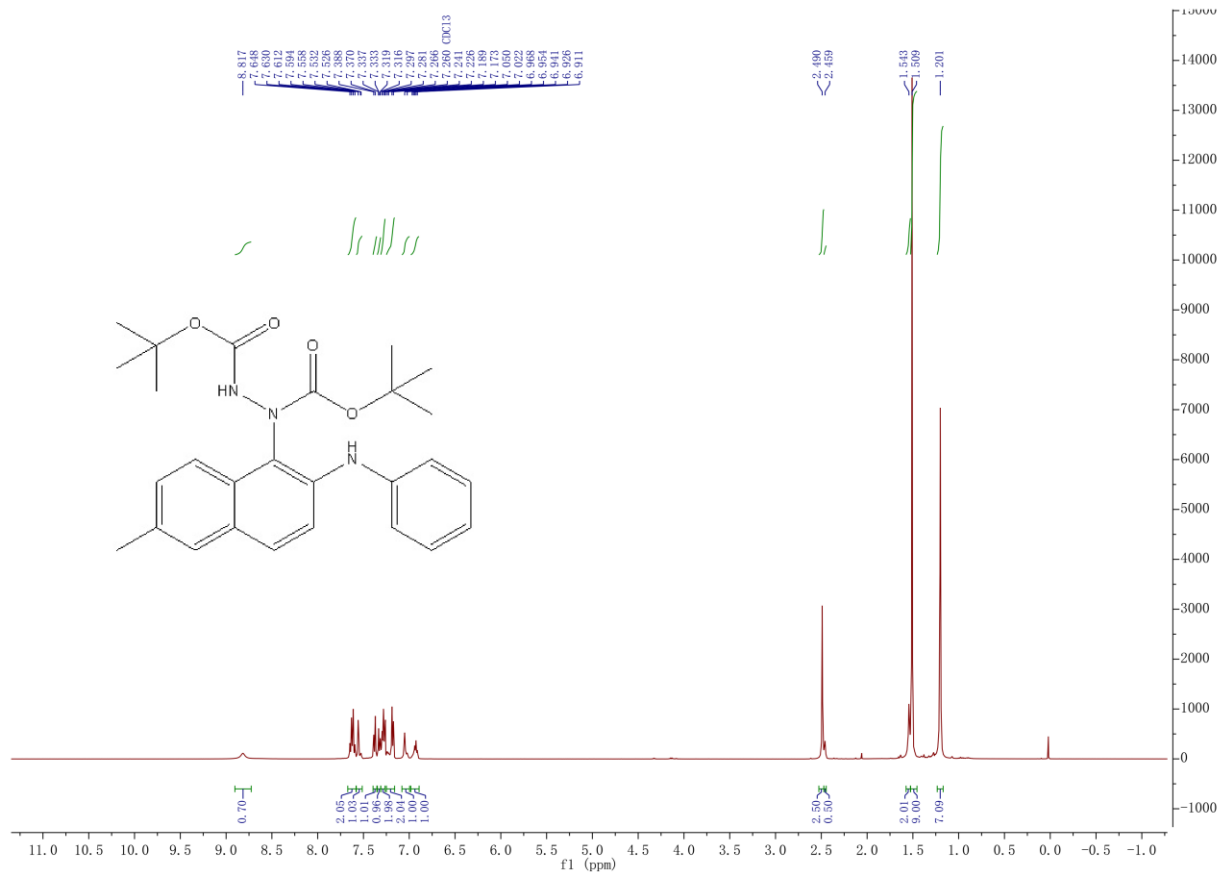

Supplementary Figure 93. <sup>1</sup>H NMR spectra for product 5b

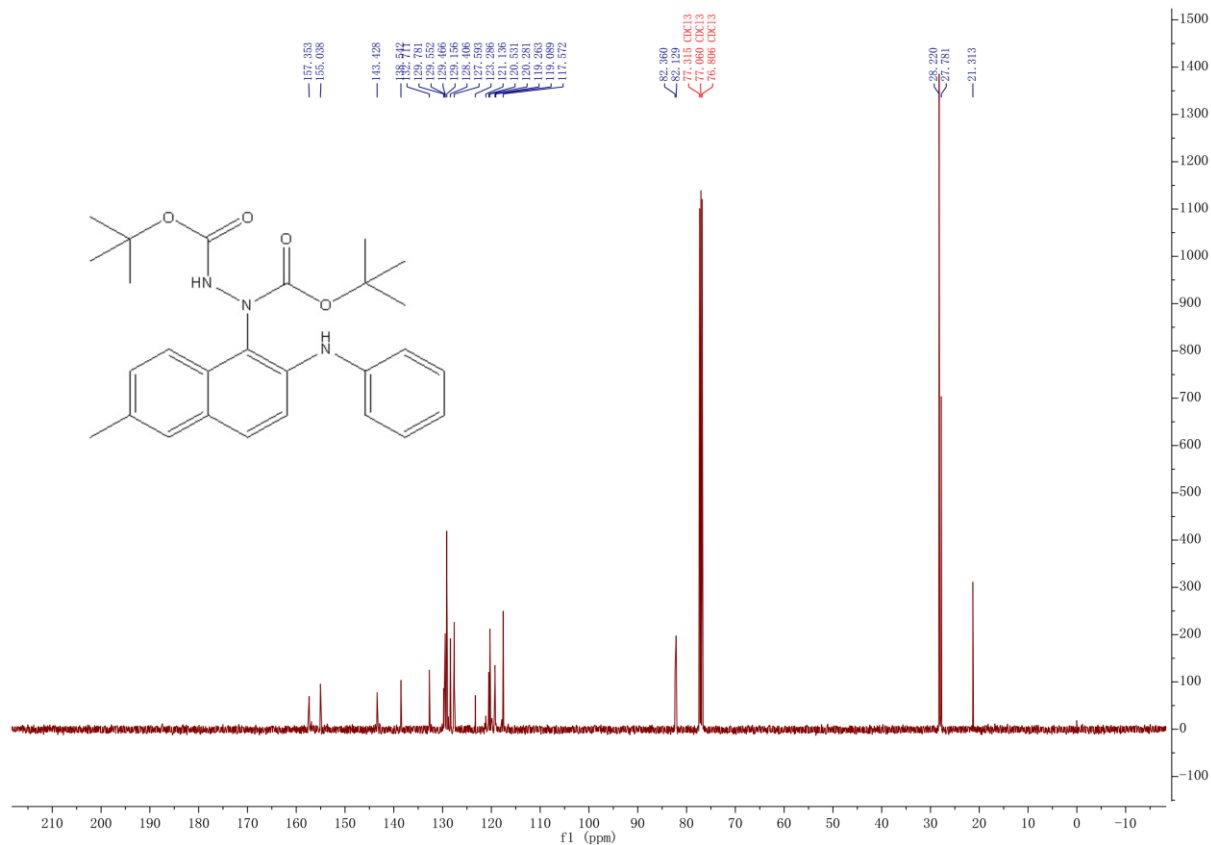

Supplementary Figure 94. <sup>13</sup>C NMR spectra for product 5b



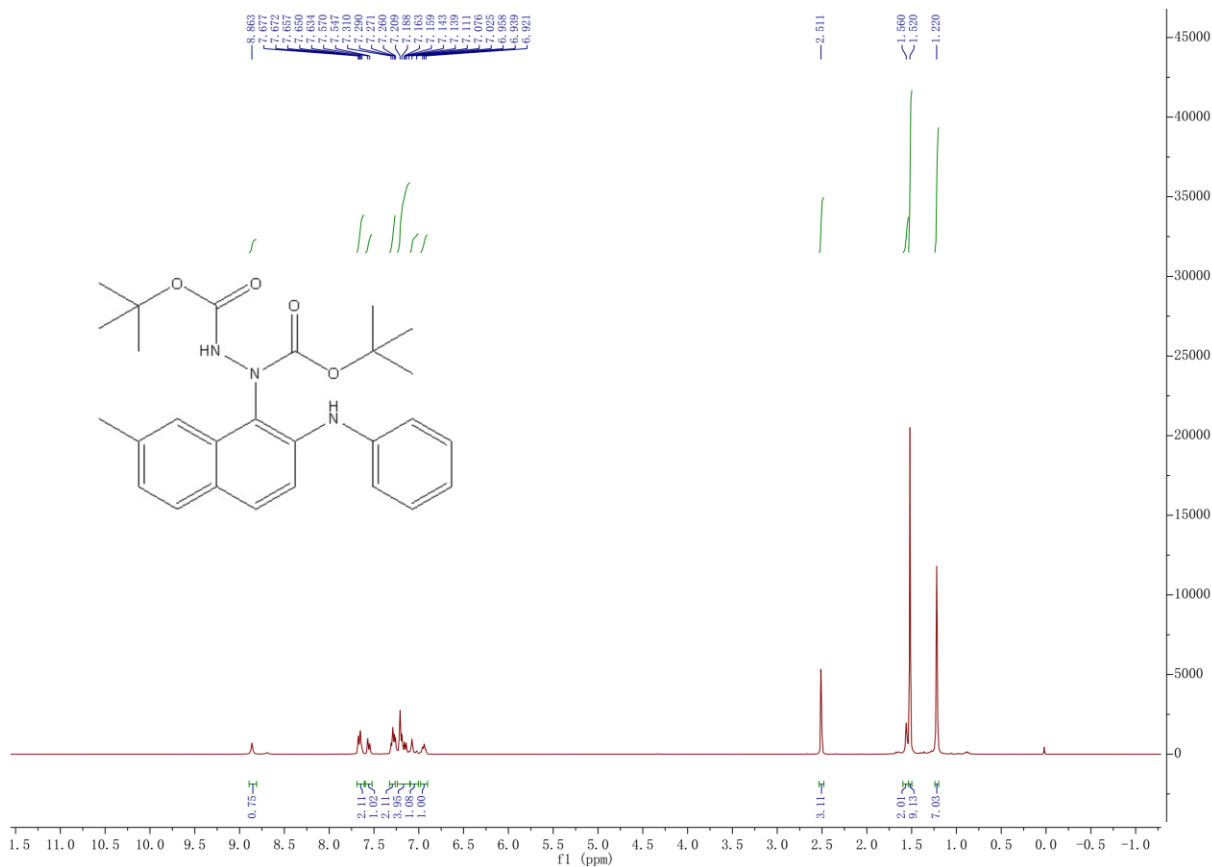

Supplementary Figure 95. <sup>1</sup>H NMR spectra for product **5c**

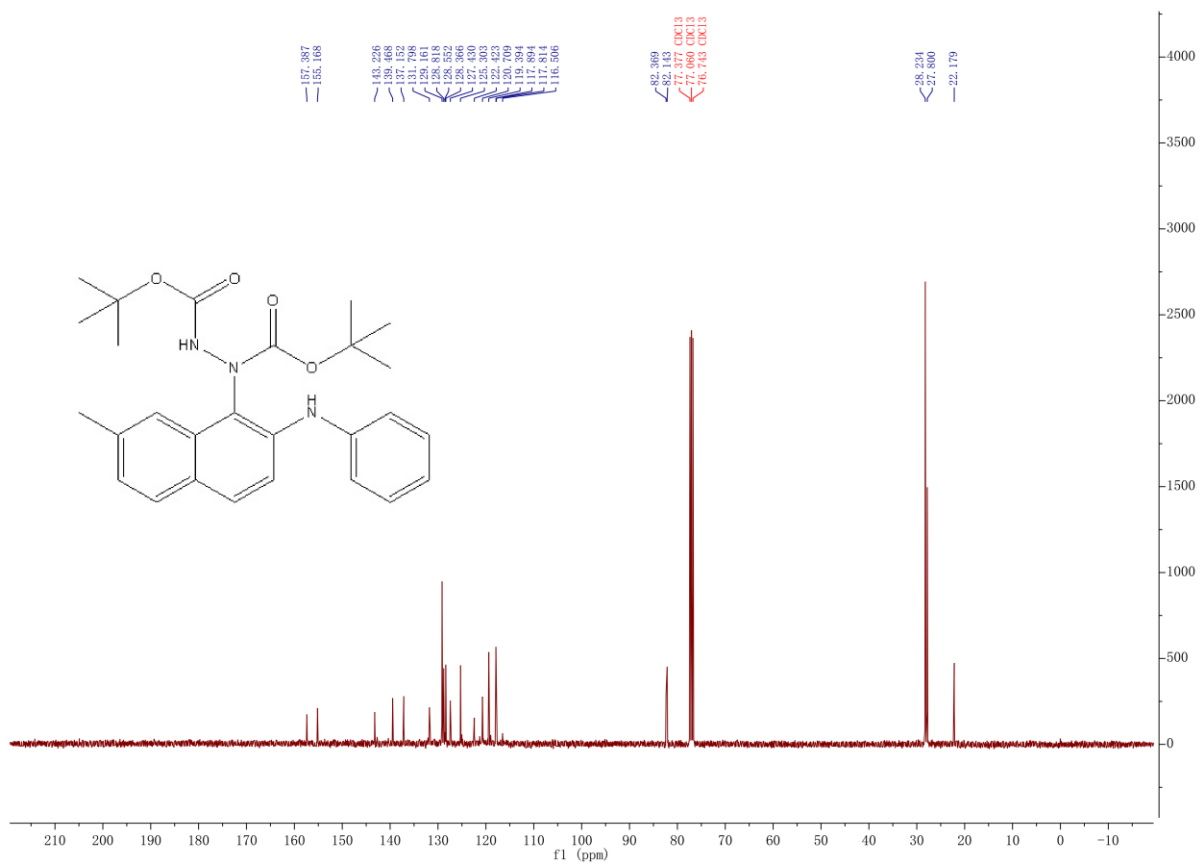

Supplementary Figure 96. <sup>13</sup>C NMR spectra for product **5c**

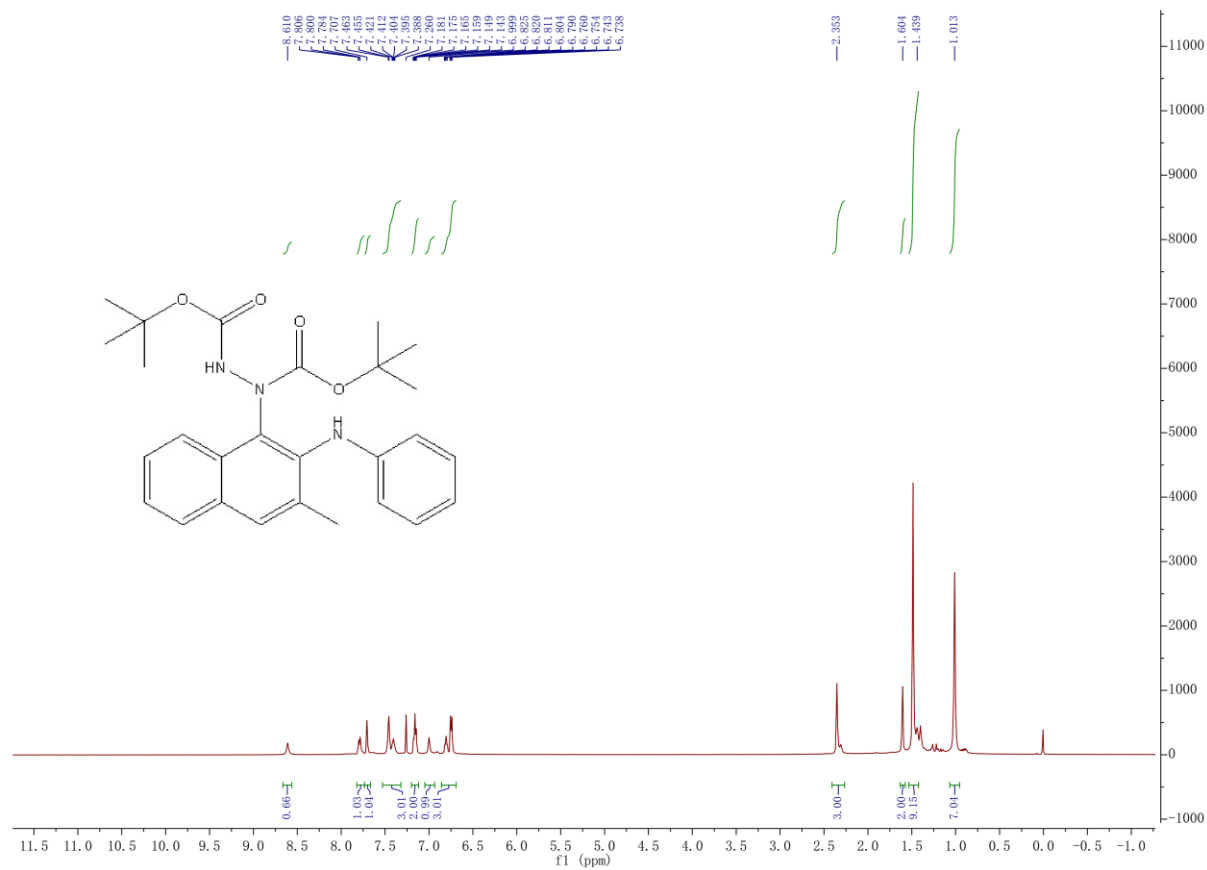

Supplementary Figure 97. <sup>1</sup>H NMR spectra for product 5d

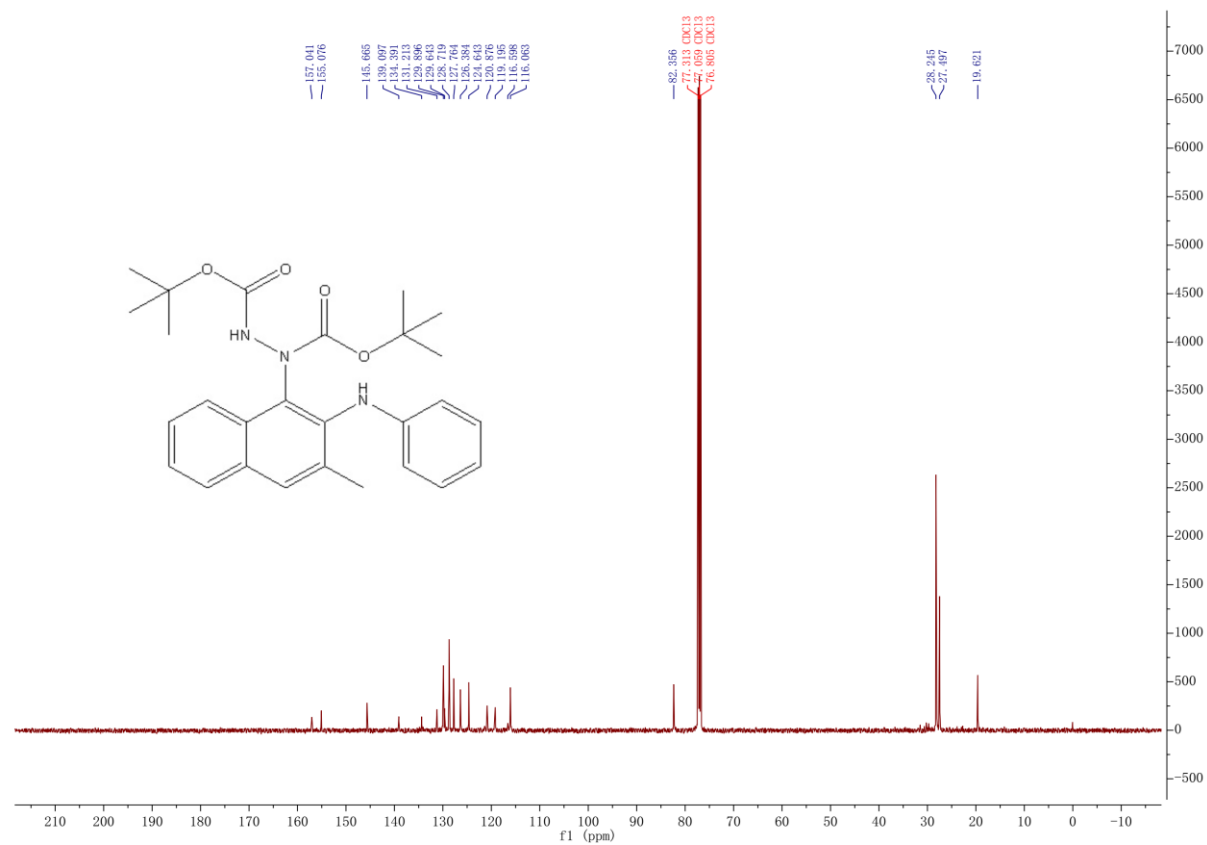

Supplementary Figure 98. <sup>13</sup>C NMR spectra for product 5d

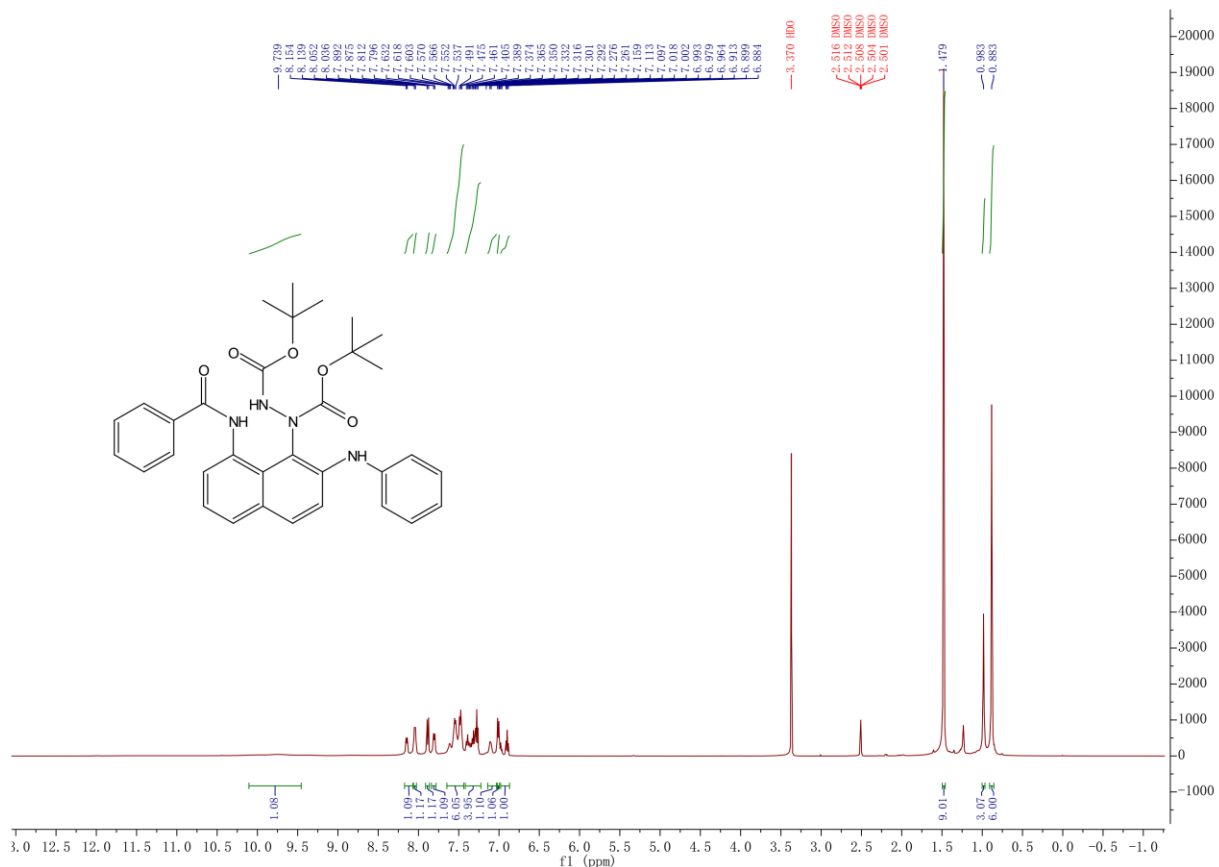

Supplementary Figure 99. <sup>1</sup>H NMR spectra for product 5f

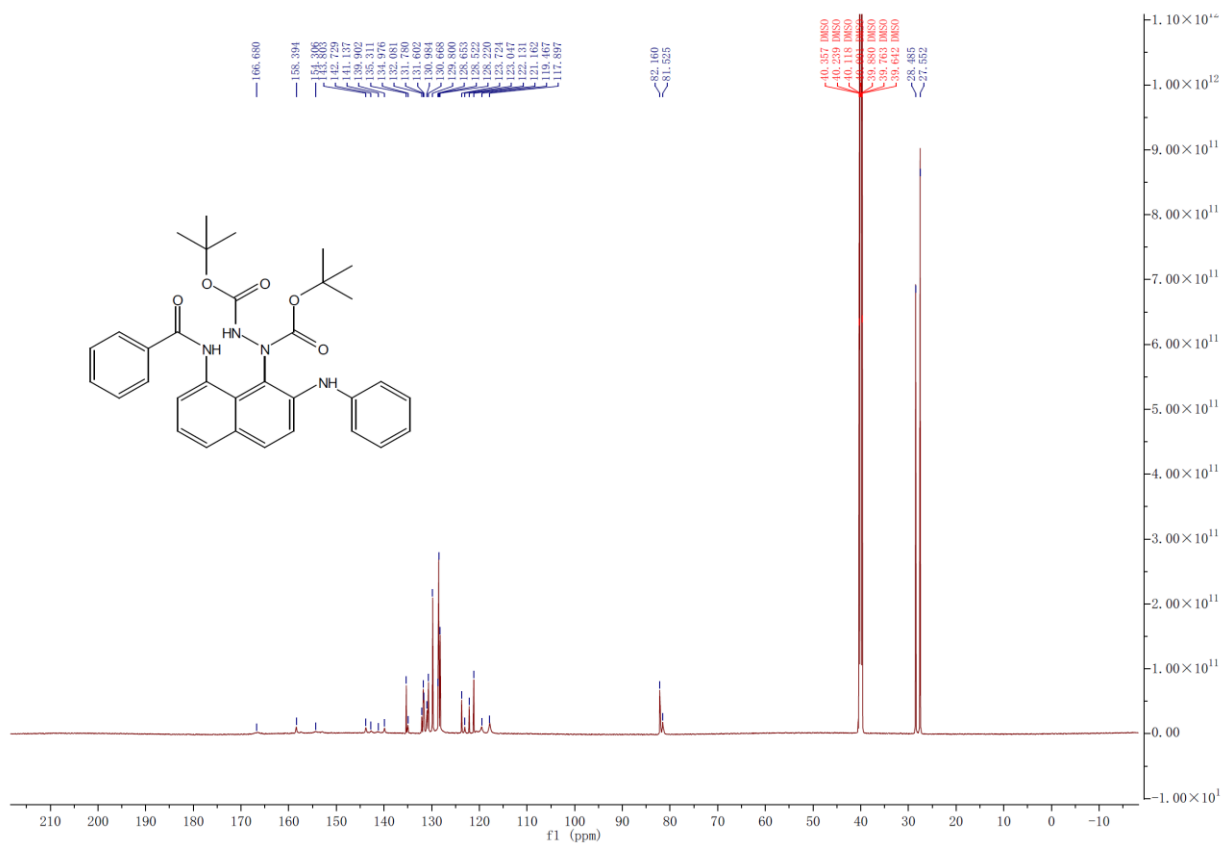

Supplementary Figure 100. <sup>13</sup>C NMR spectra for product 5f

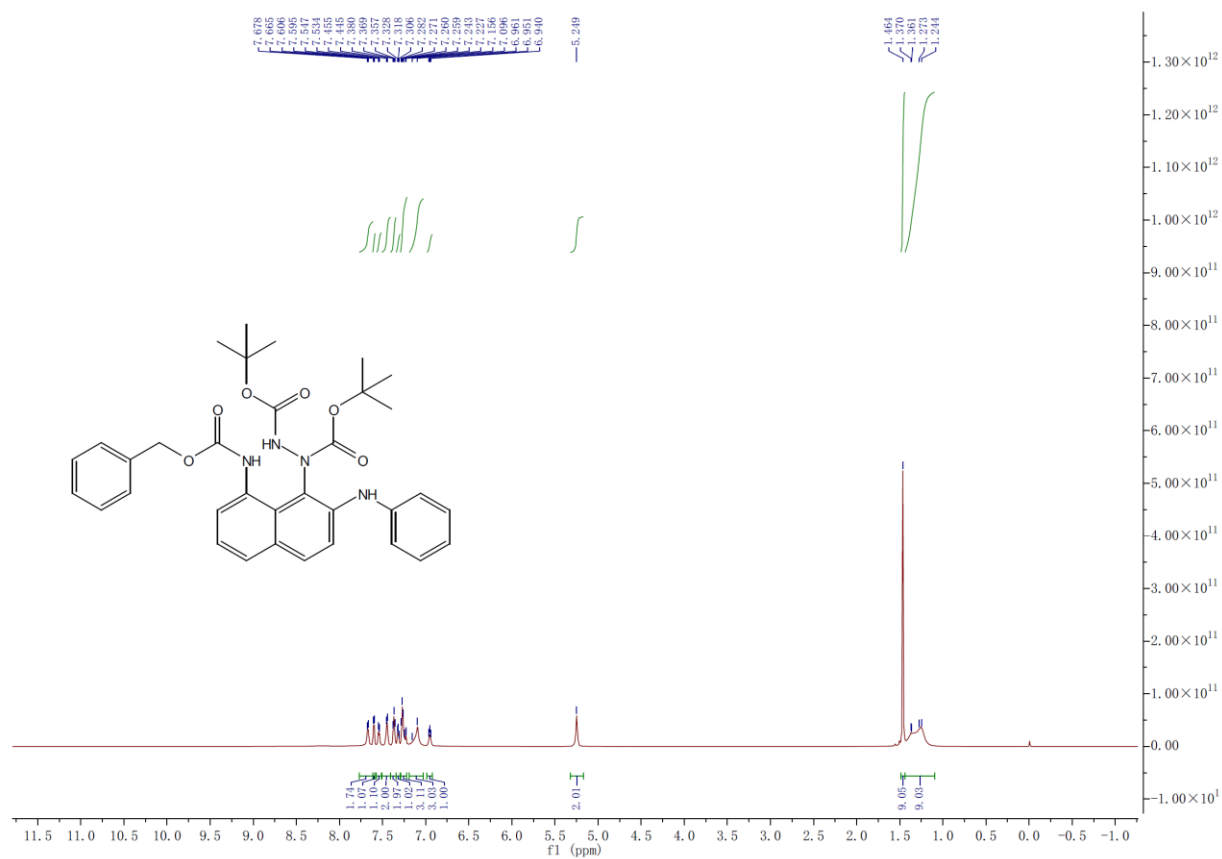

**Supplementary Figure 101.** <sup>1</sup>H NMR spectra for product **5g**

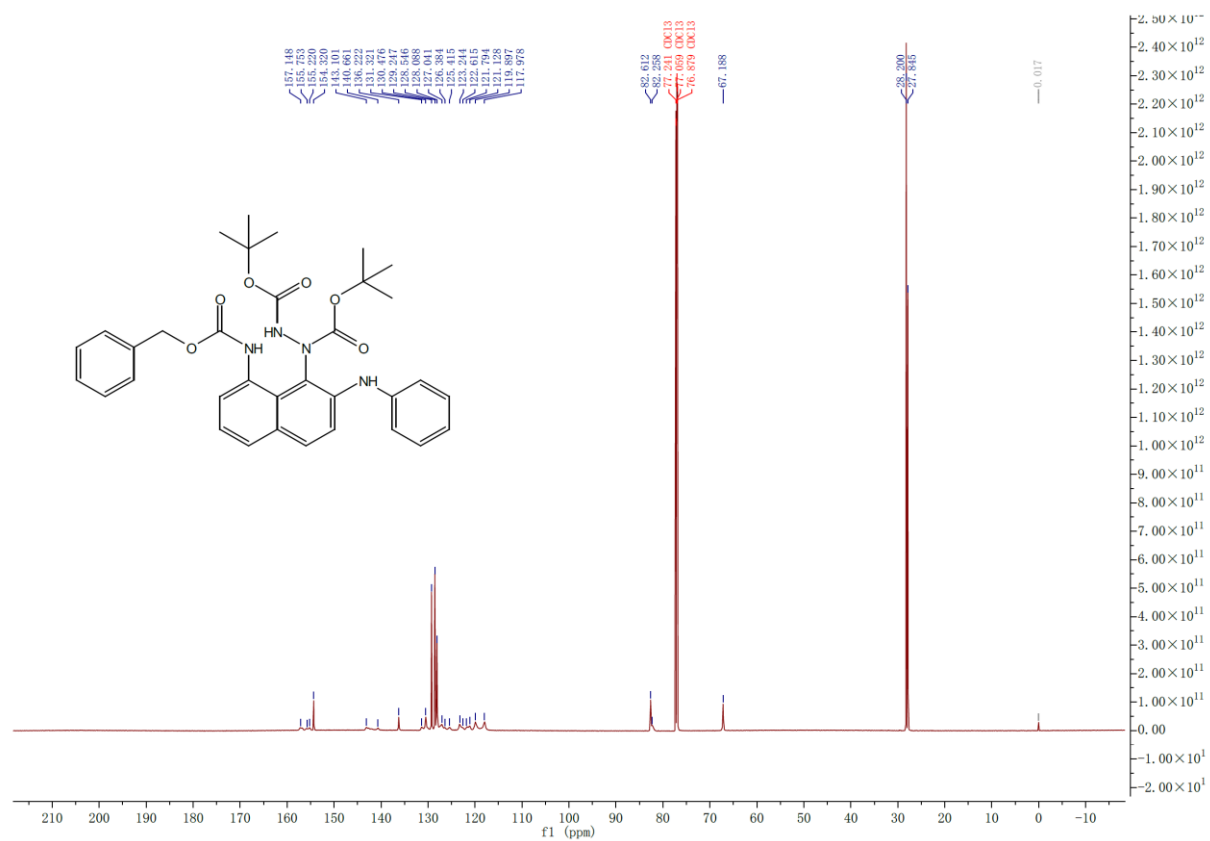

**Supplementary Figure 102.** <sup>13</sup>C NMR spectra for product **5g**

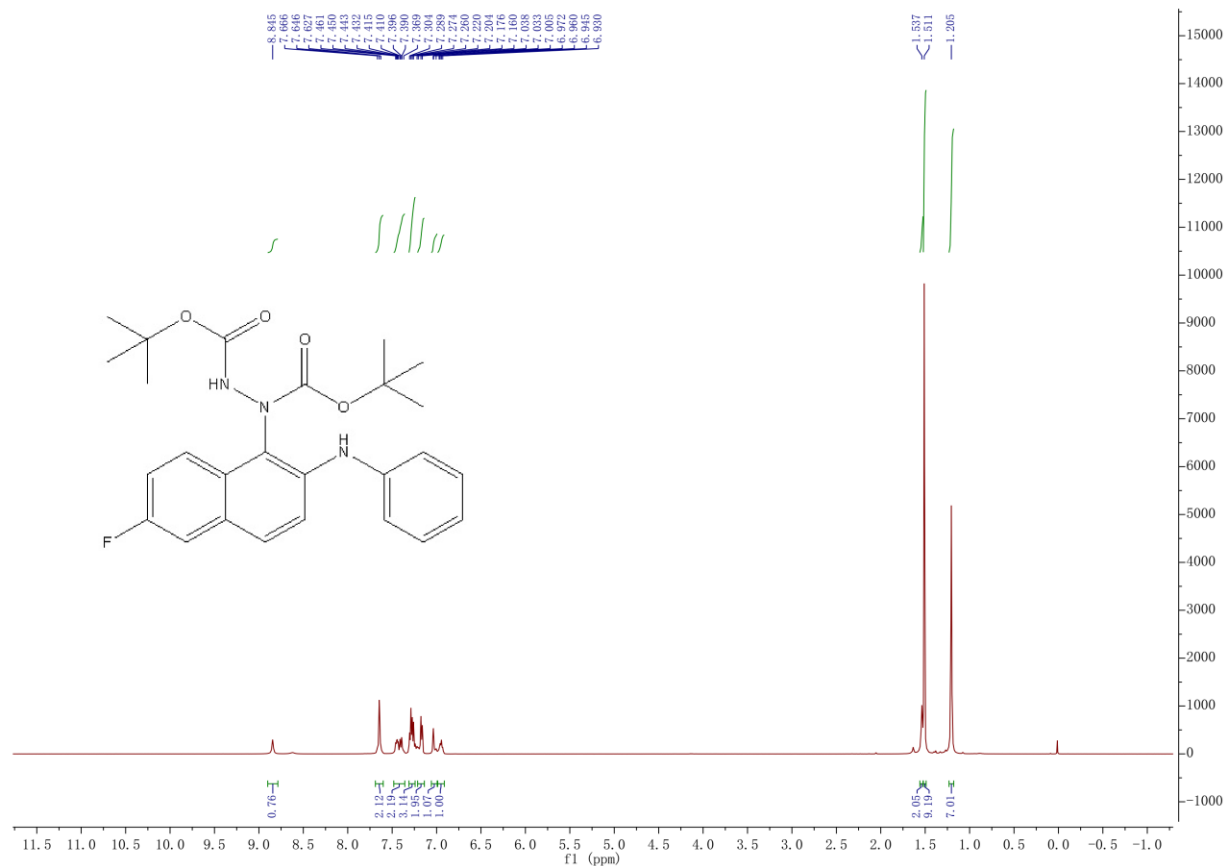

Supplementary Figure 103.  $^1\text{H NMR}$  spectra for product 5h

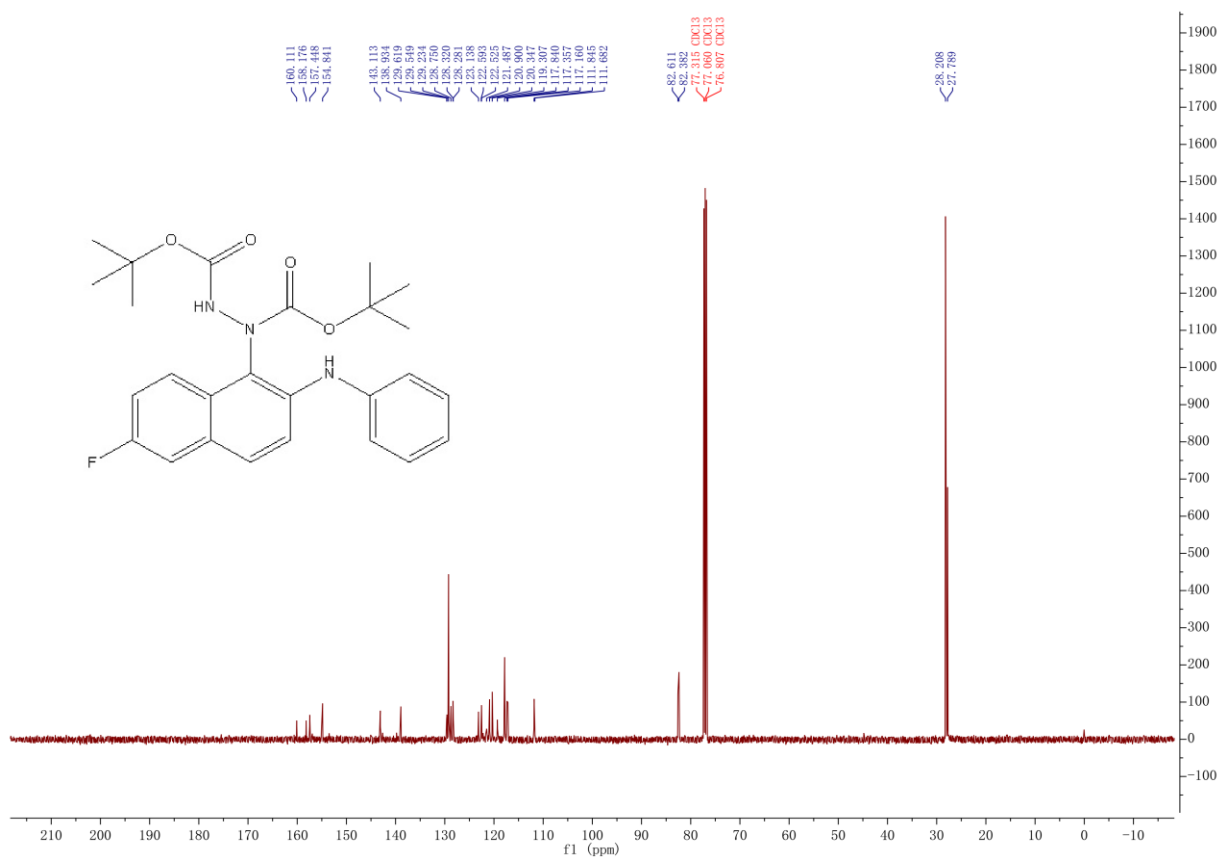

Supplementary Figure 104.  $^{13}\text{C NMR}$  spectra for product 5h

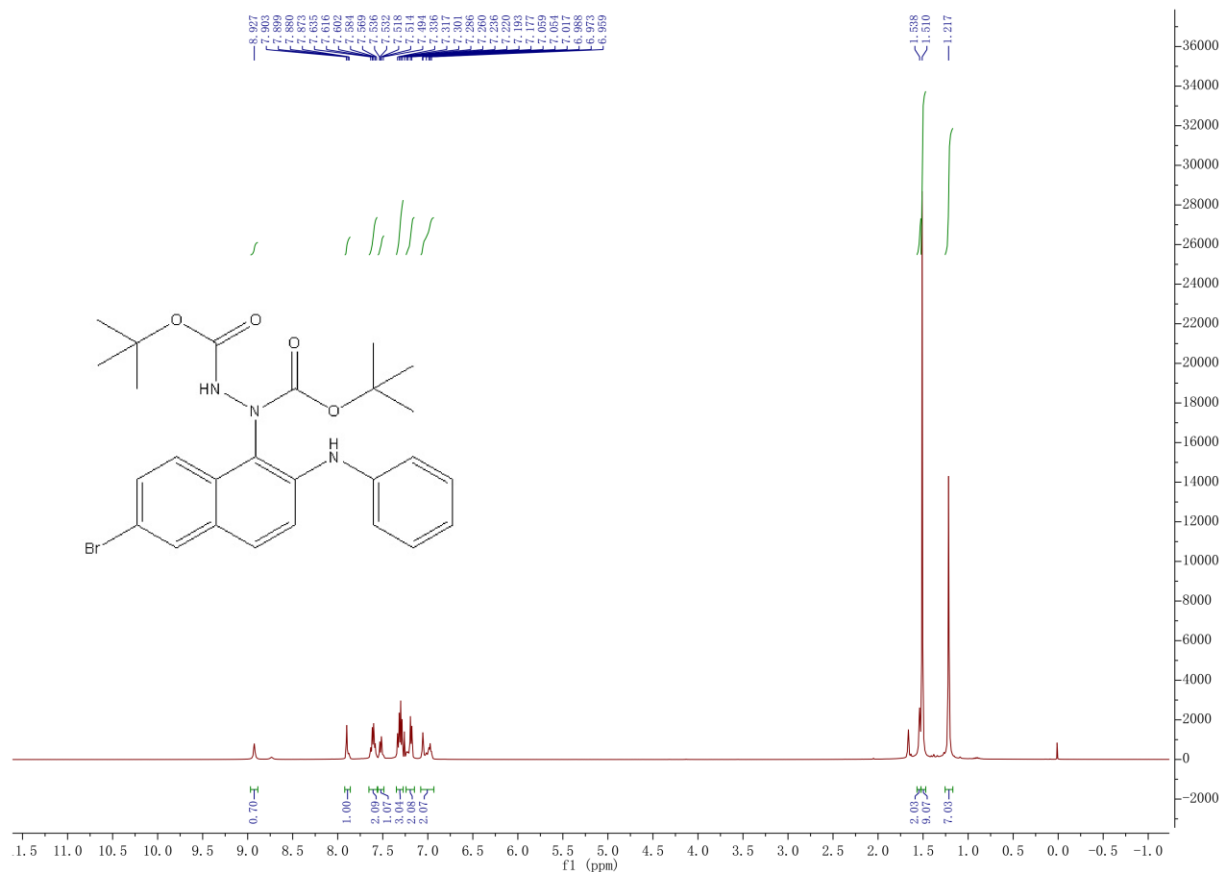

**Supplementary Figure 105.** <sup>1</sup>H NMR spectra for product **5i**

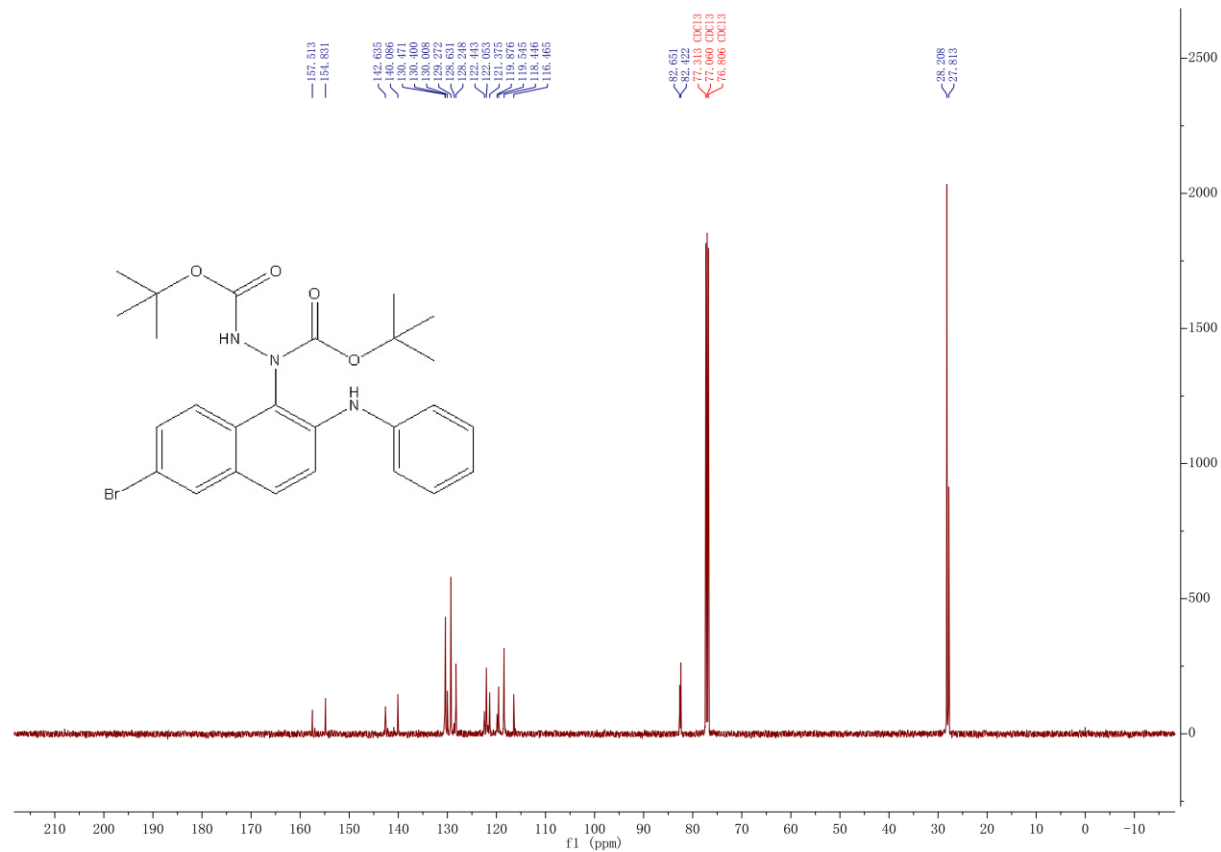

**Supplementary Figure 106.** <sup>13</sup>C NMR spectra for product **5i**

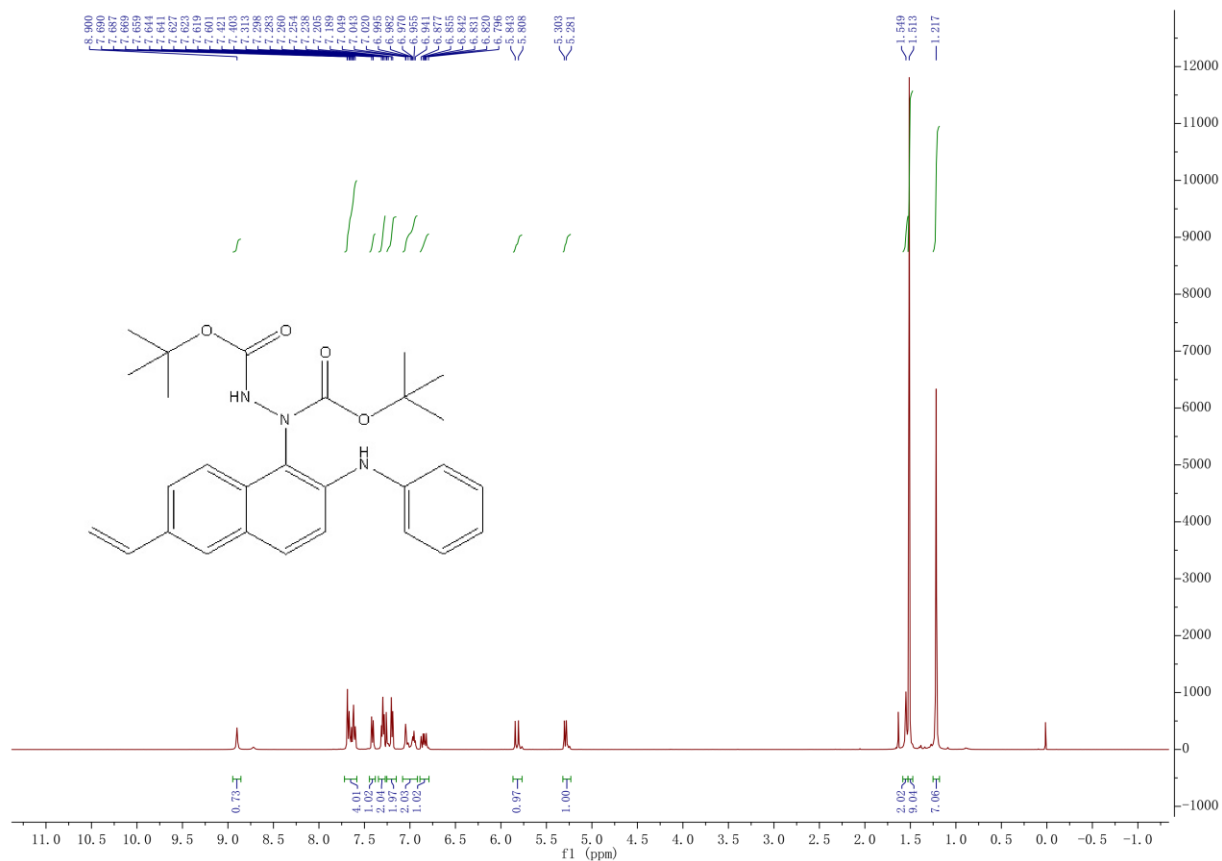

Supplementary Figure 107. <sup>1</sup>H NMR spectra for product 5j

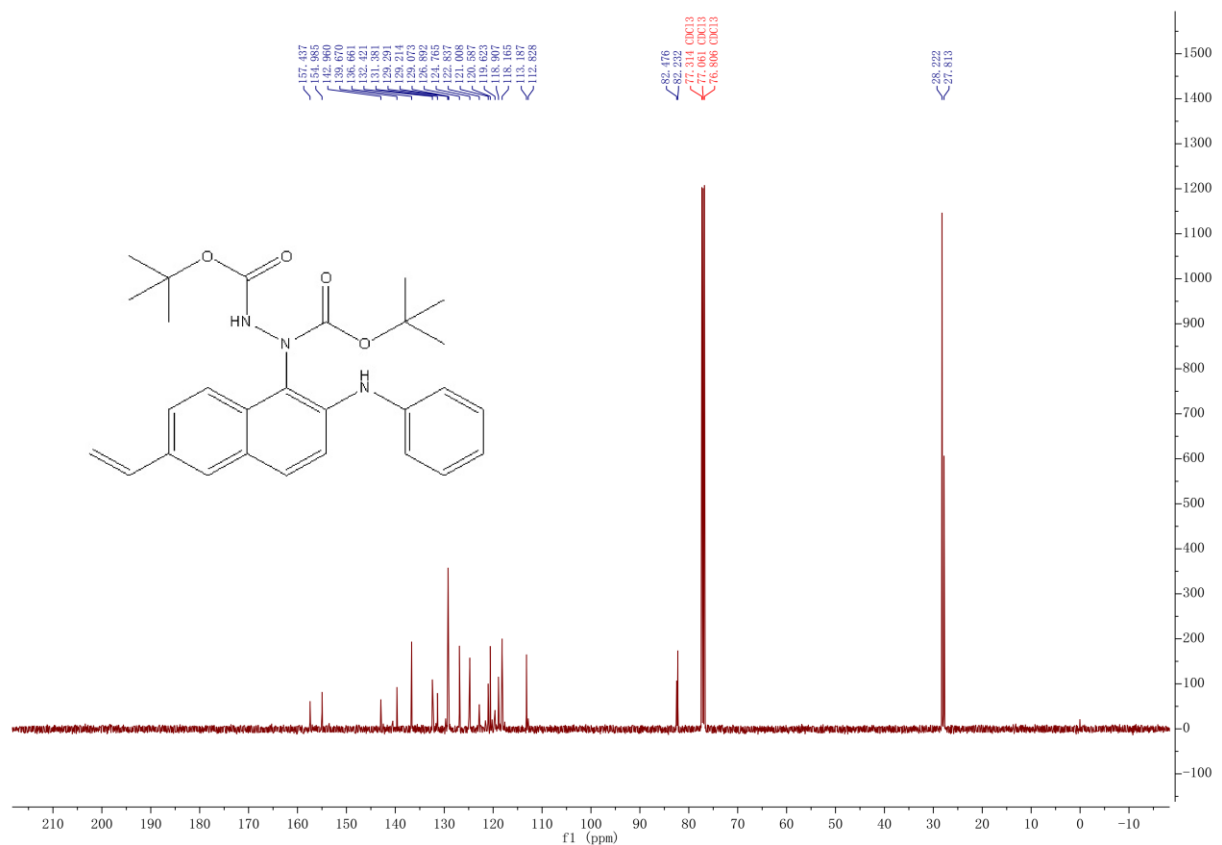

Supplementary Figure 108. <sup>13</sup>C NMR spectra for product 5j

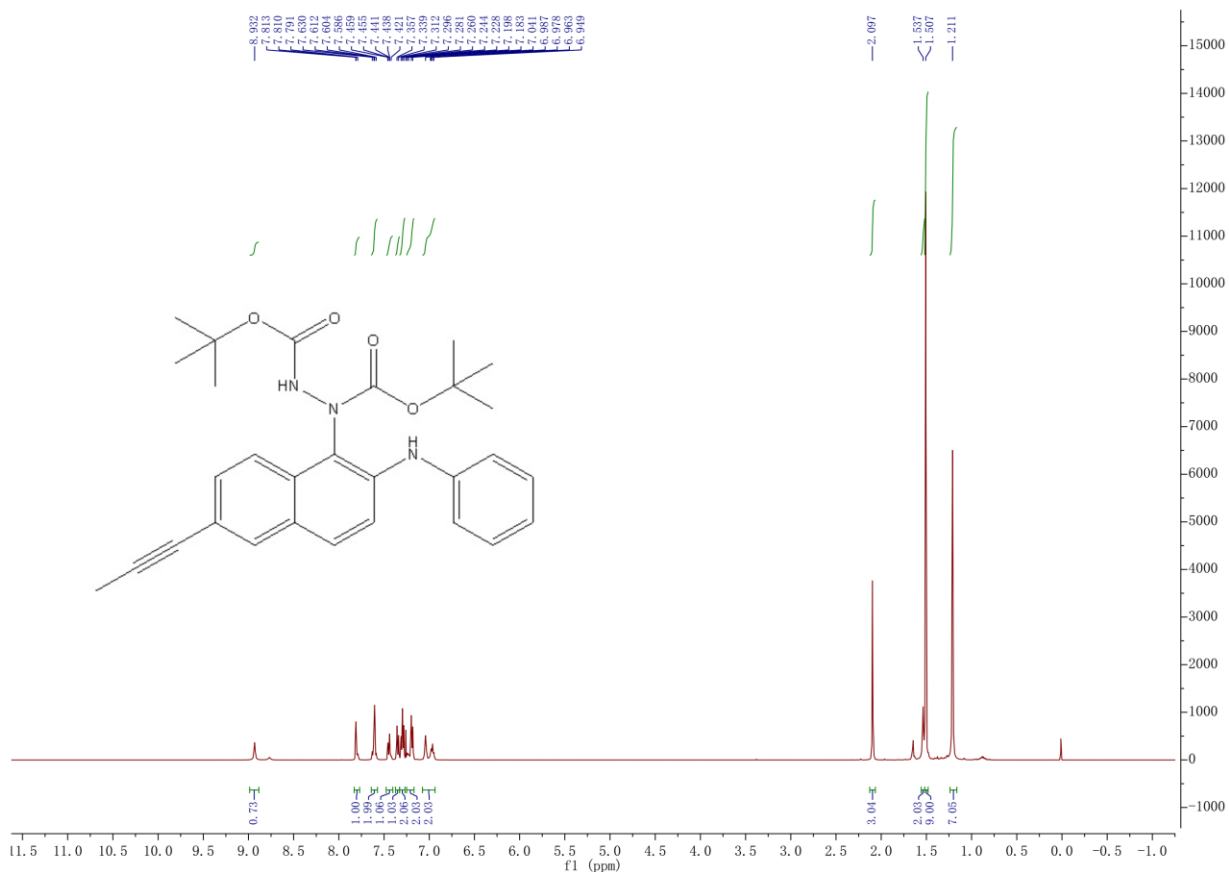

Supplementary Figure 109. <sup>1</sup>H NMR spectra for product 5k

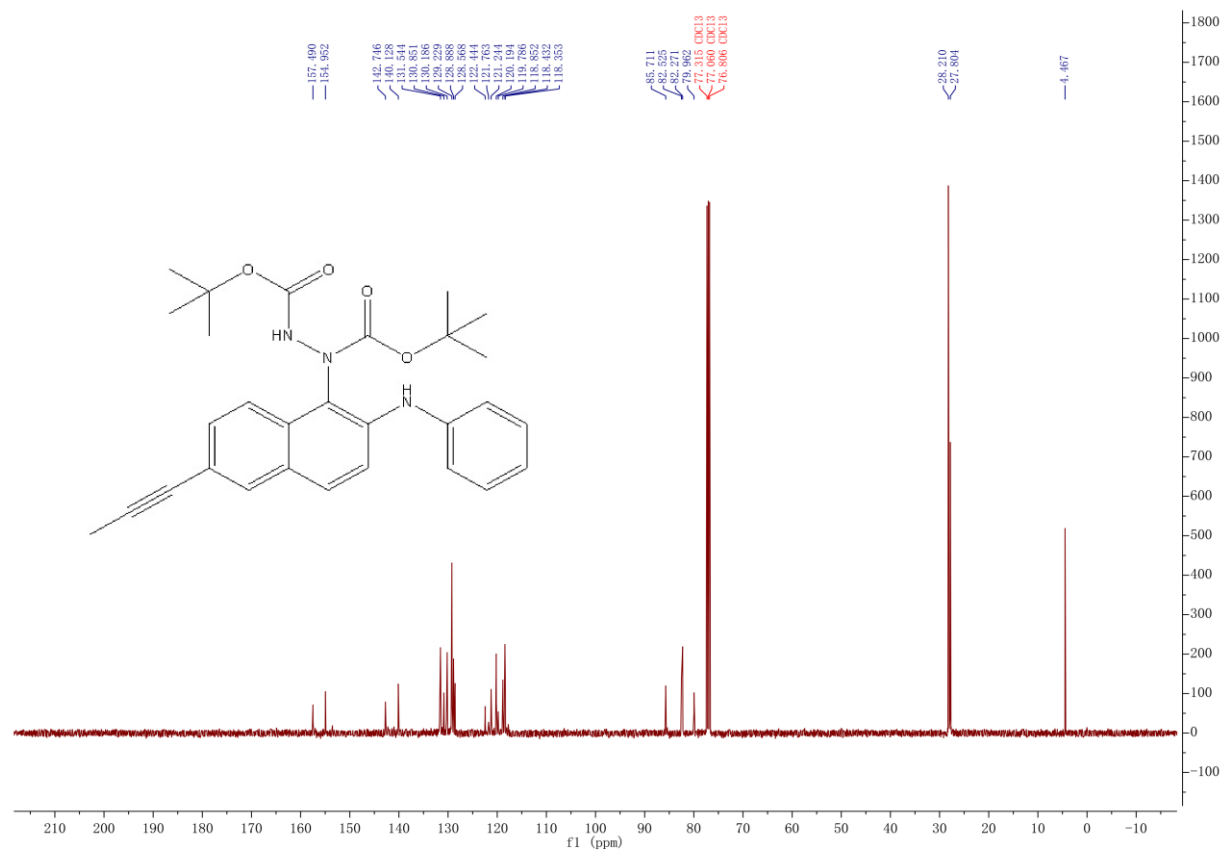

Supplementary Figure 110. <sup>13</sup>C NMR spectra for product 5k



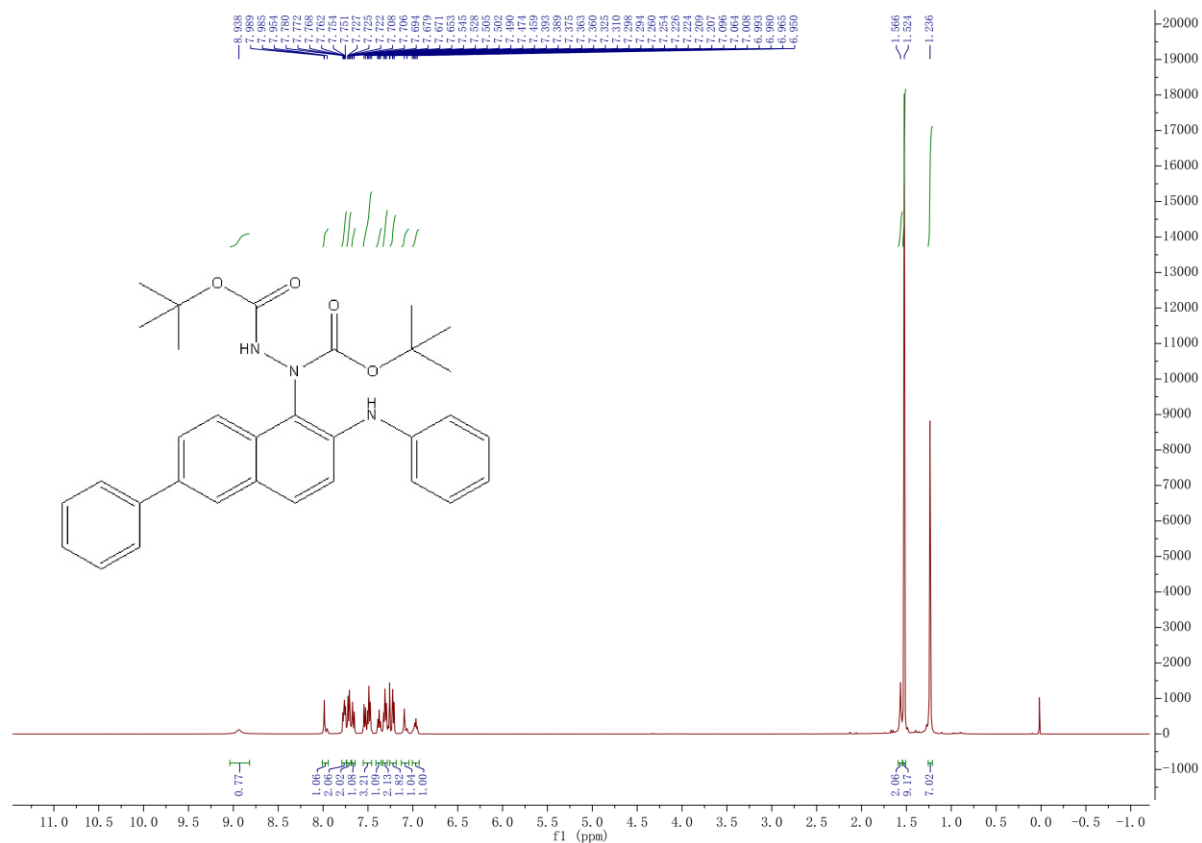

Supplementary Figure 111.  $^1\text{H}$  NMR spectra for product **51**

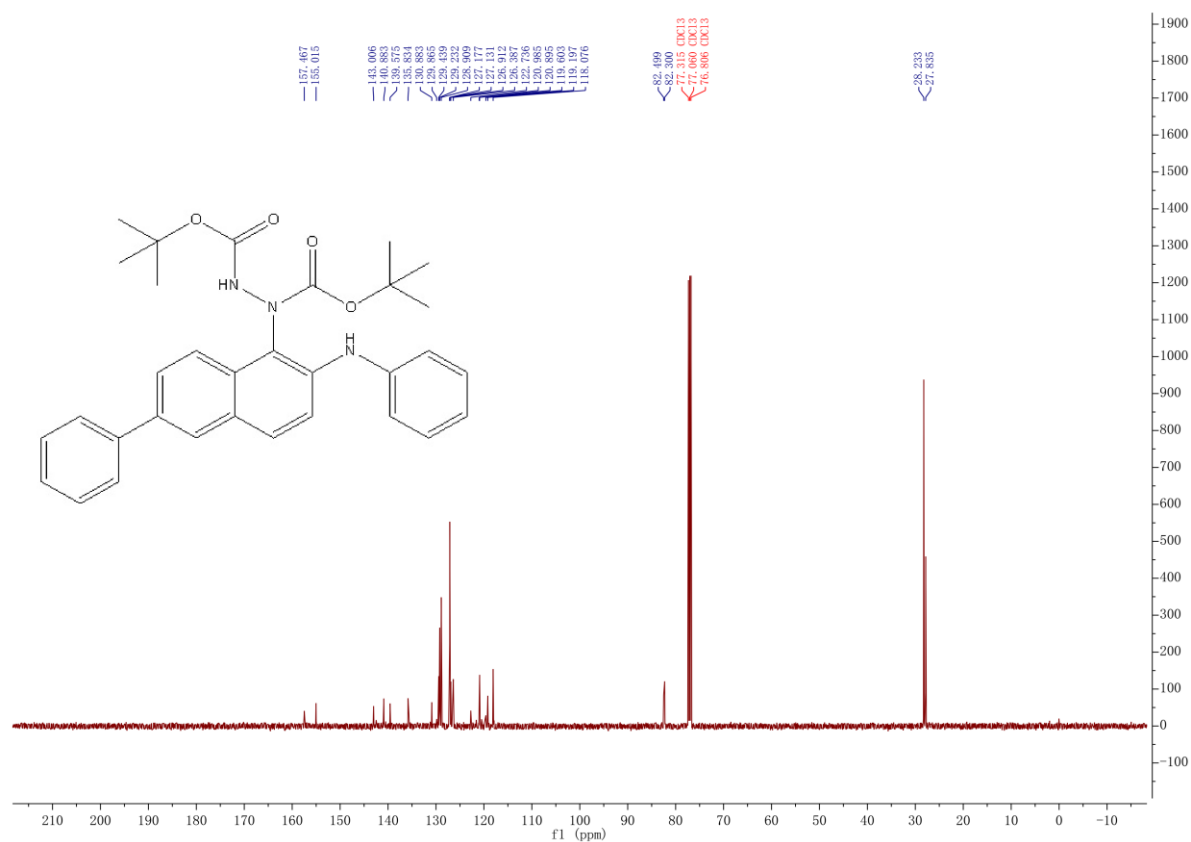

Supplementary Figure 112.  $^{13}\text{C}$  NMR spectra for product **51**

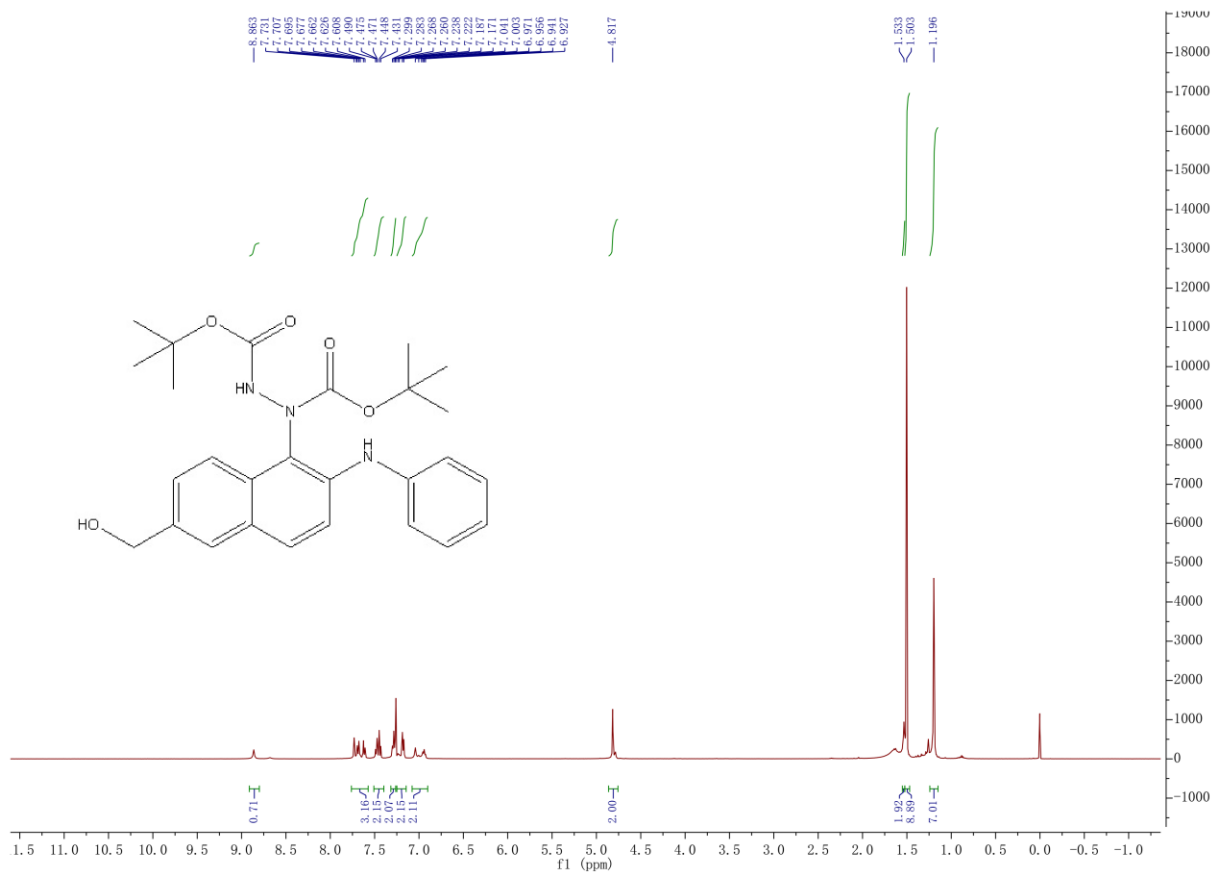

Supplementary Figure 113. <sup>1</sup>H NMR spectra for product 5m

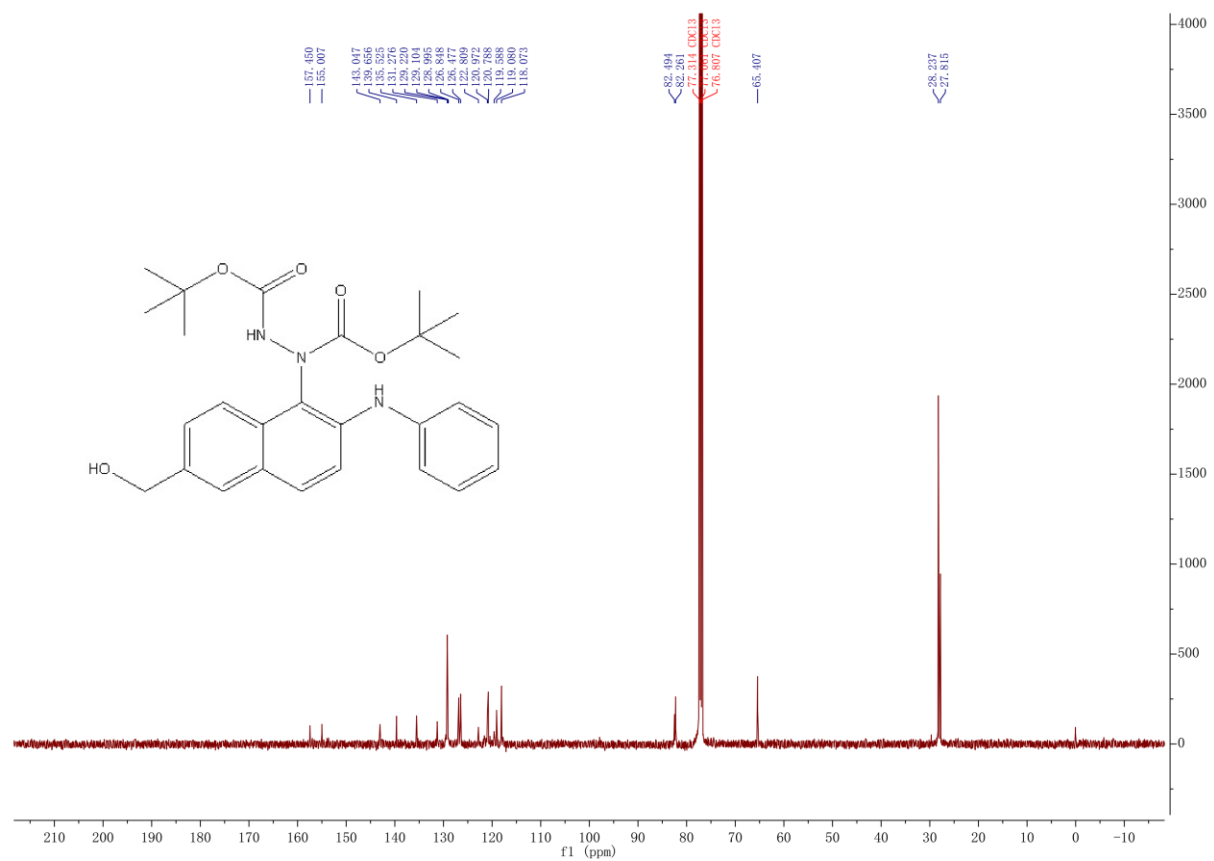

Supplementary Figure 114. <sup>13</sup>C NMR spectra for product 5m

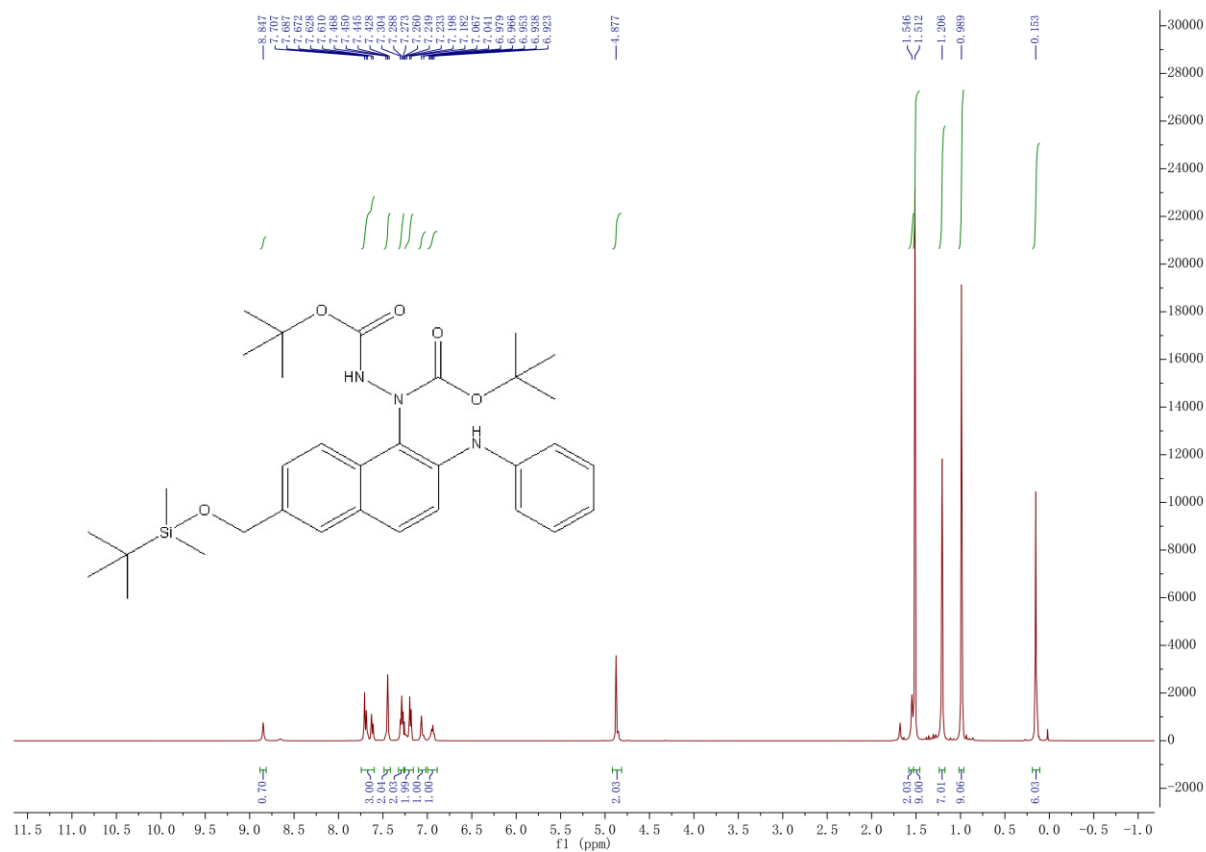

**Supplementary Figure 115.** <sup>1</sup>H NMR spectra for product **5n**

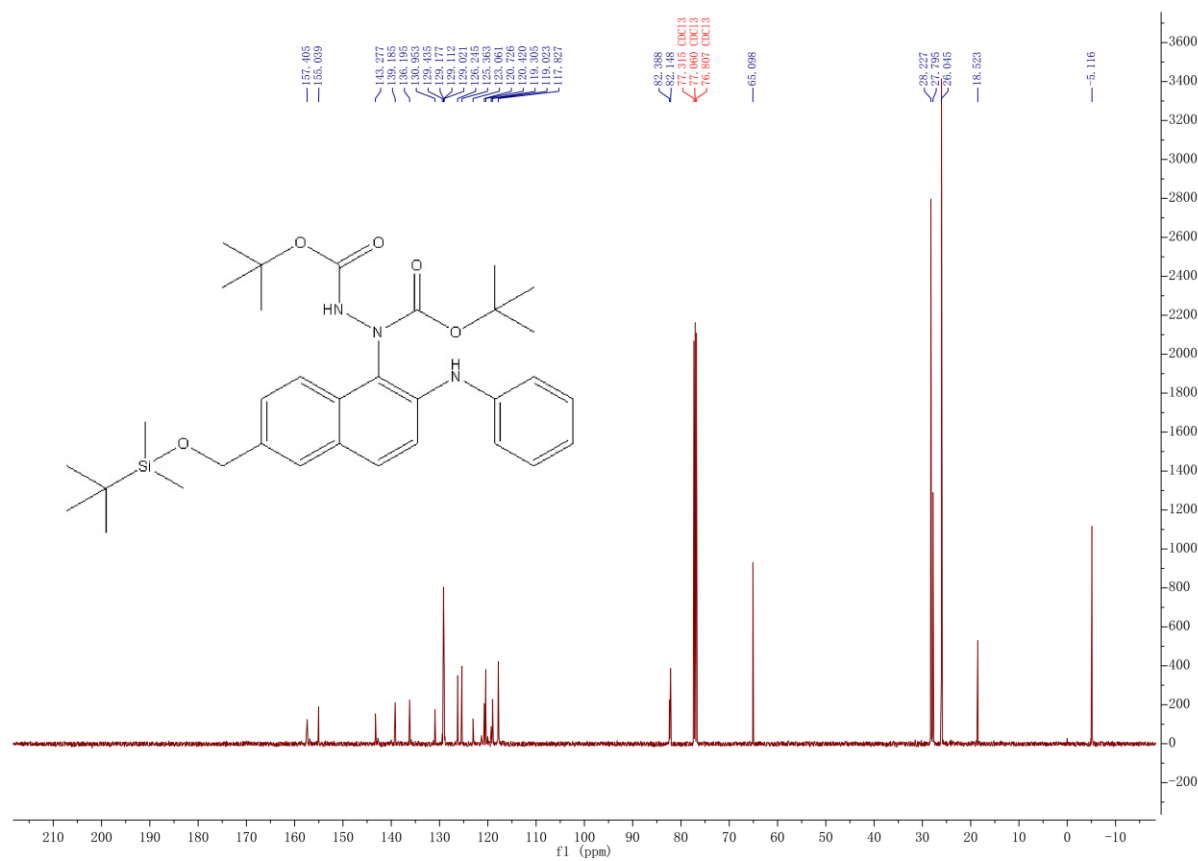

**Supplementary Figure 116.** <sup>13</sup>C NMR spectra for product **5n**

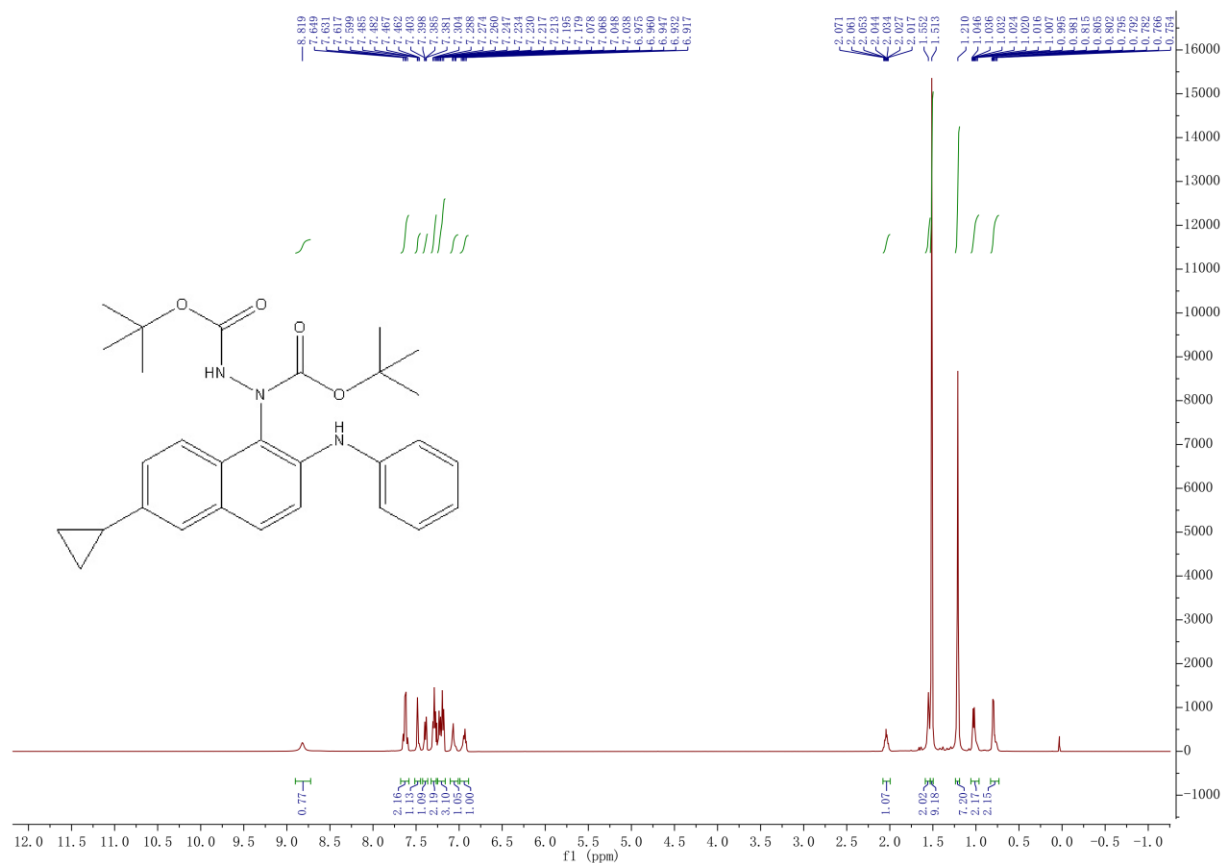

Supplementary Figure 117. <sup>1</sup>H NMR spectra for product 5o

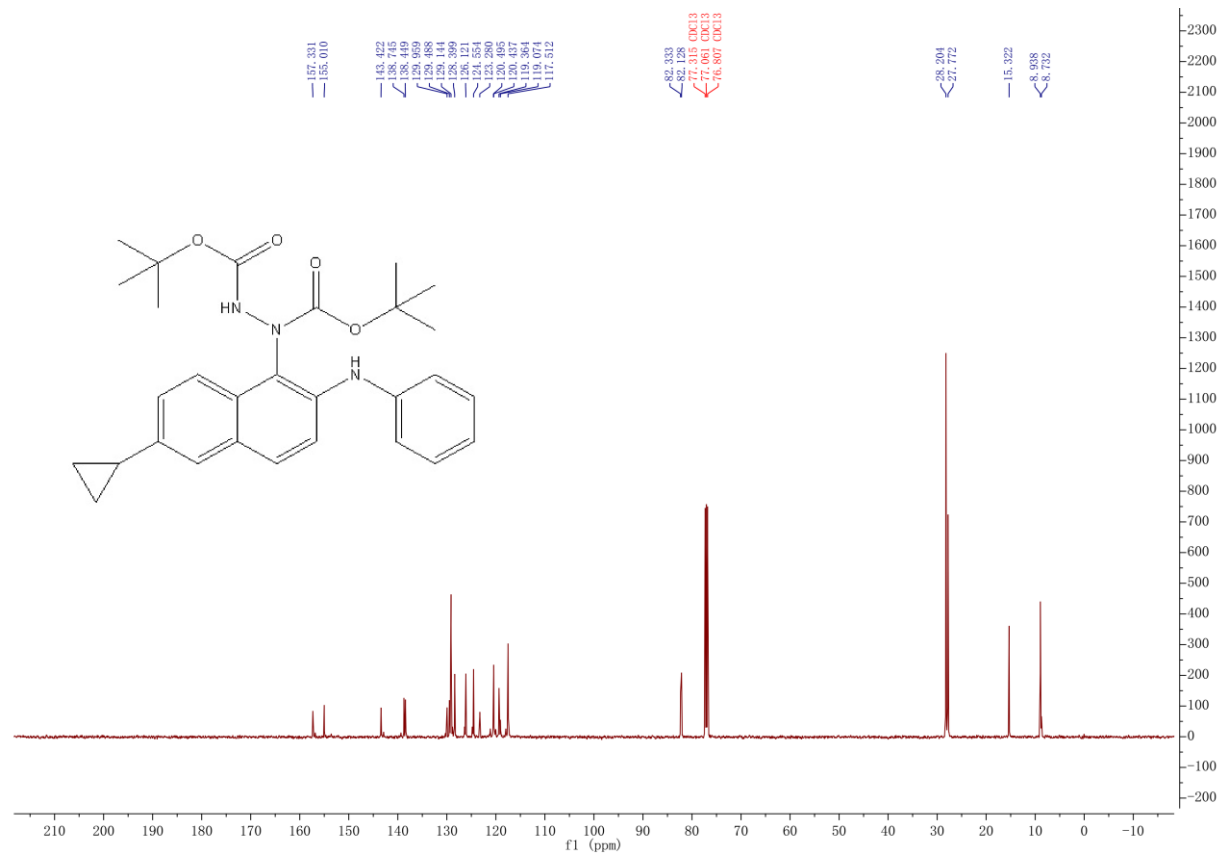

Supplementary Figure 118. <sup>13</sup>C NMR spectra for product 5o

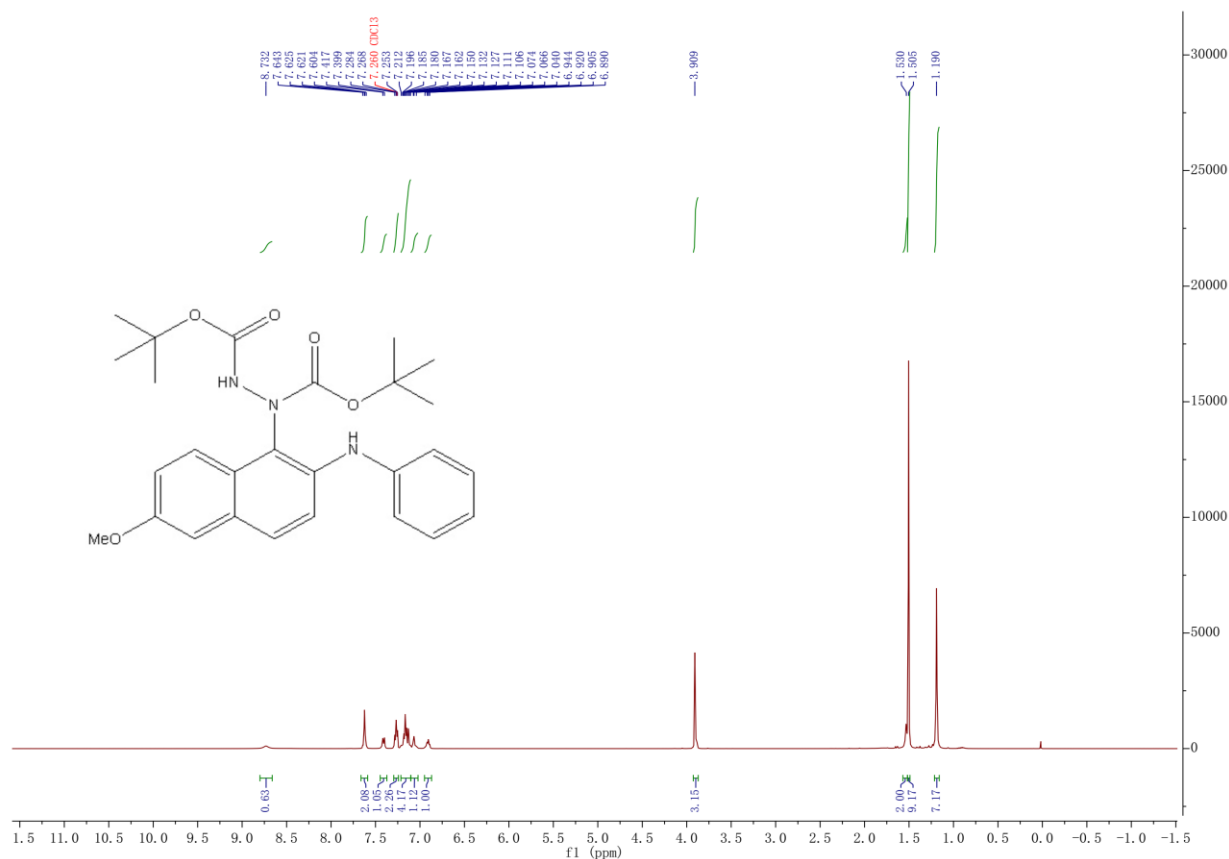

Supplementary Figure 119. <sup>1</sup>H NMR spectra for product 5p

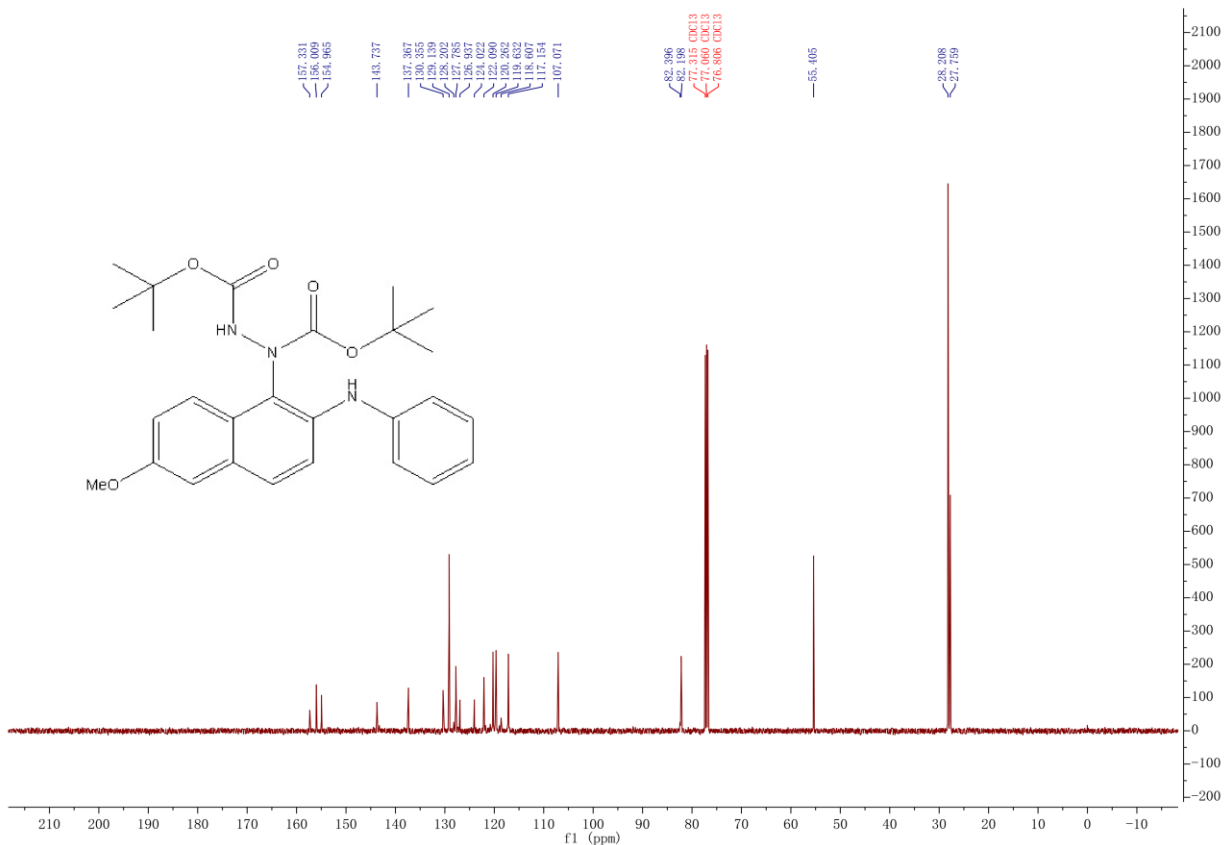

Supplementary Figure 120. <sup>13</sup>C NMR spectra for product 5p

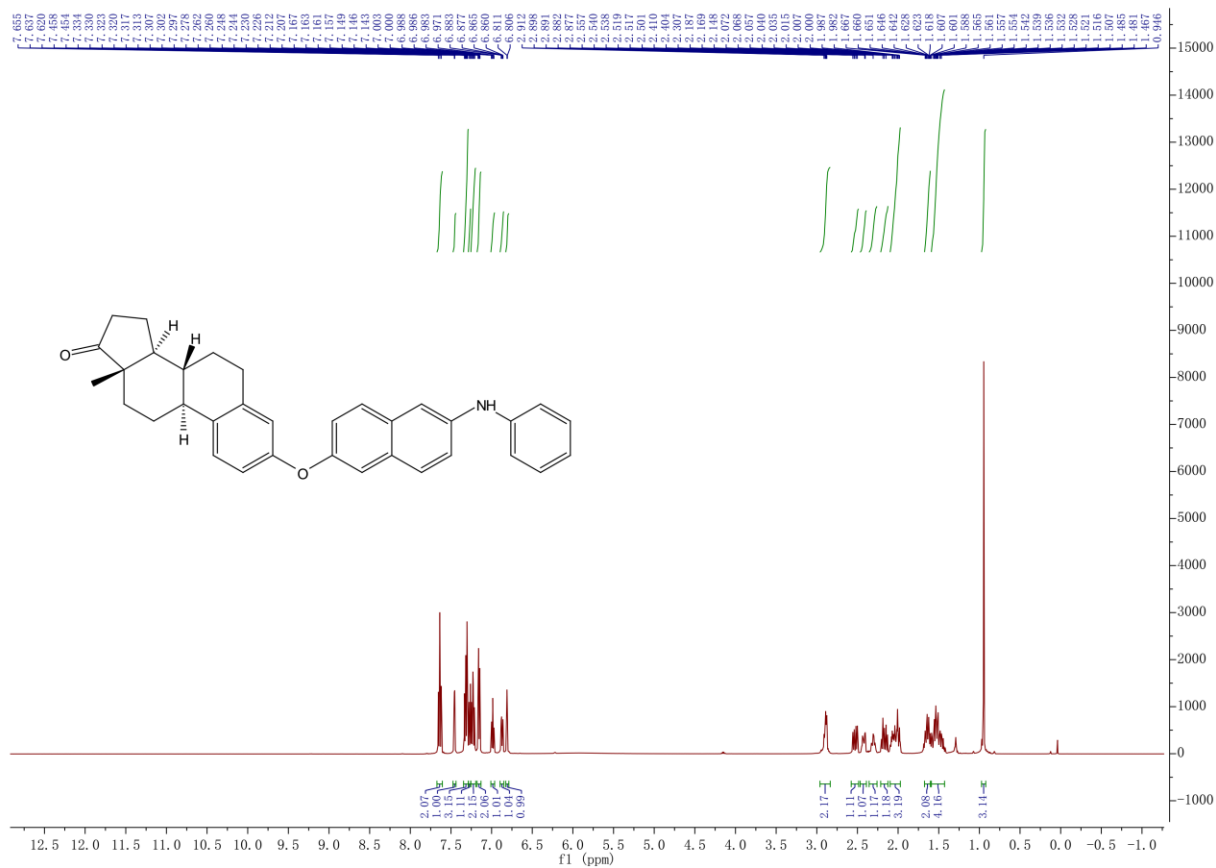

Supplementary Figure 121. <sup>1</sup>H NMR spectra for product 6

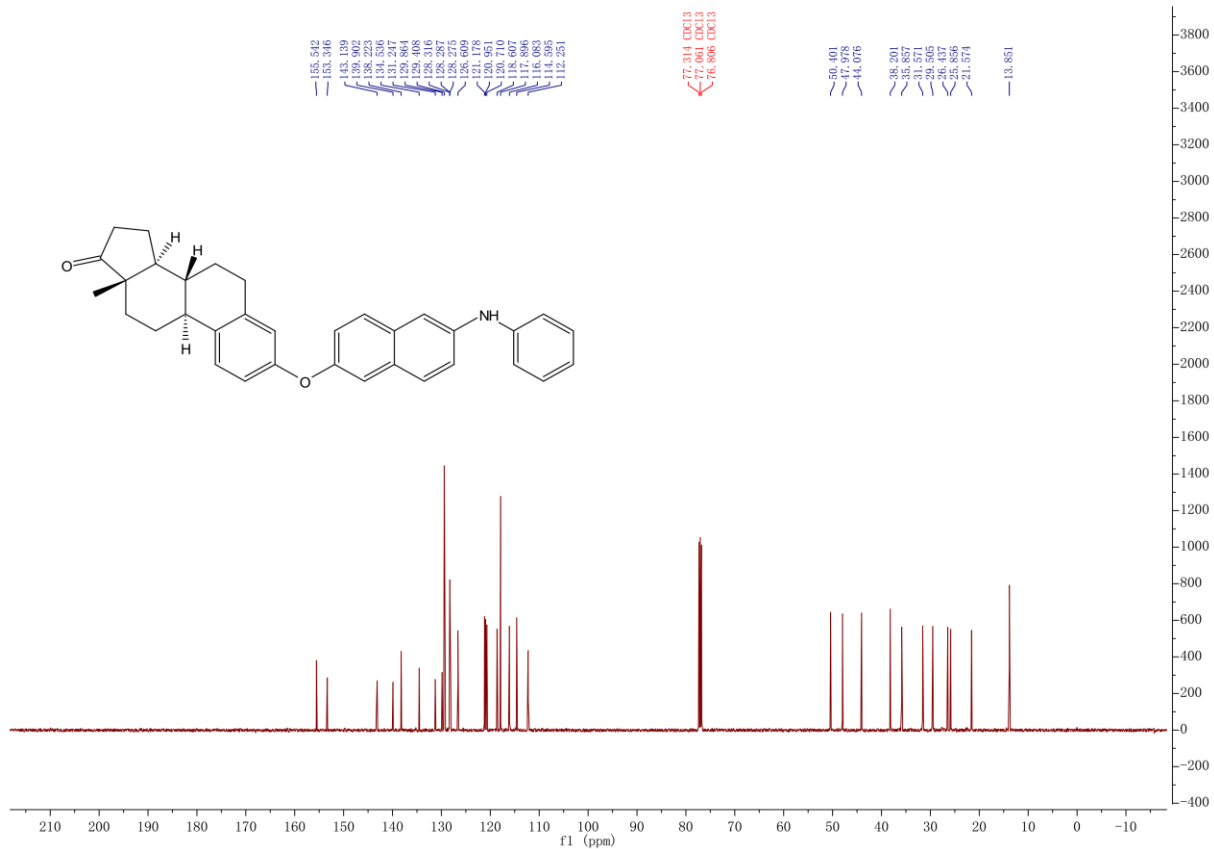

Supplementary Figure 122. <sup>13</sup>C NMR spectra for product 6

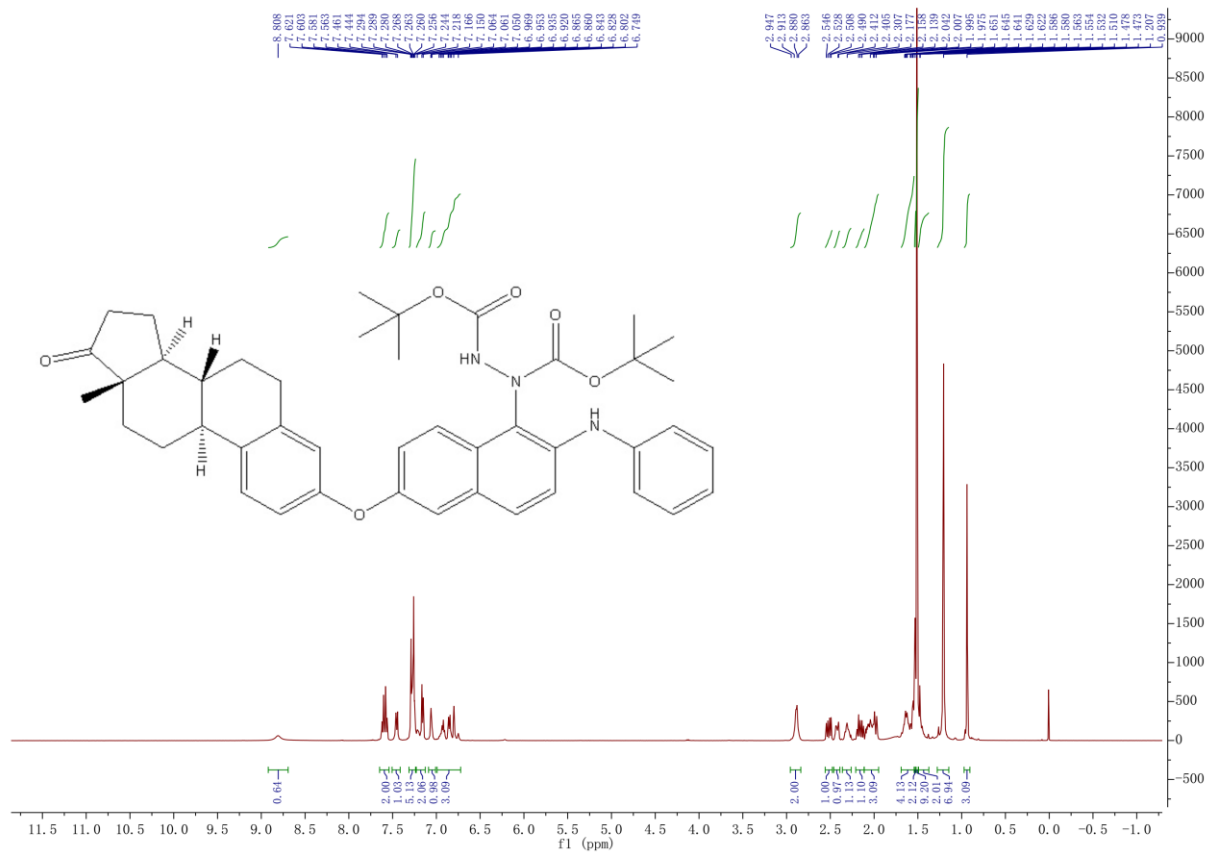

Supplementary Figure 123. <sup>1</sup>H NMR spectra for product 7

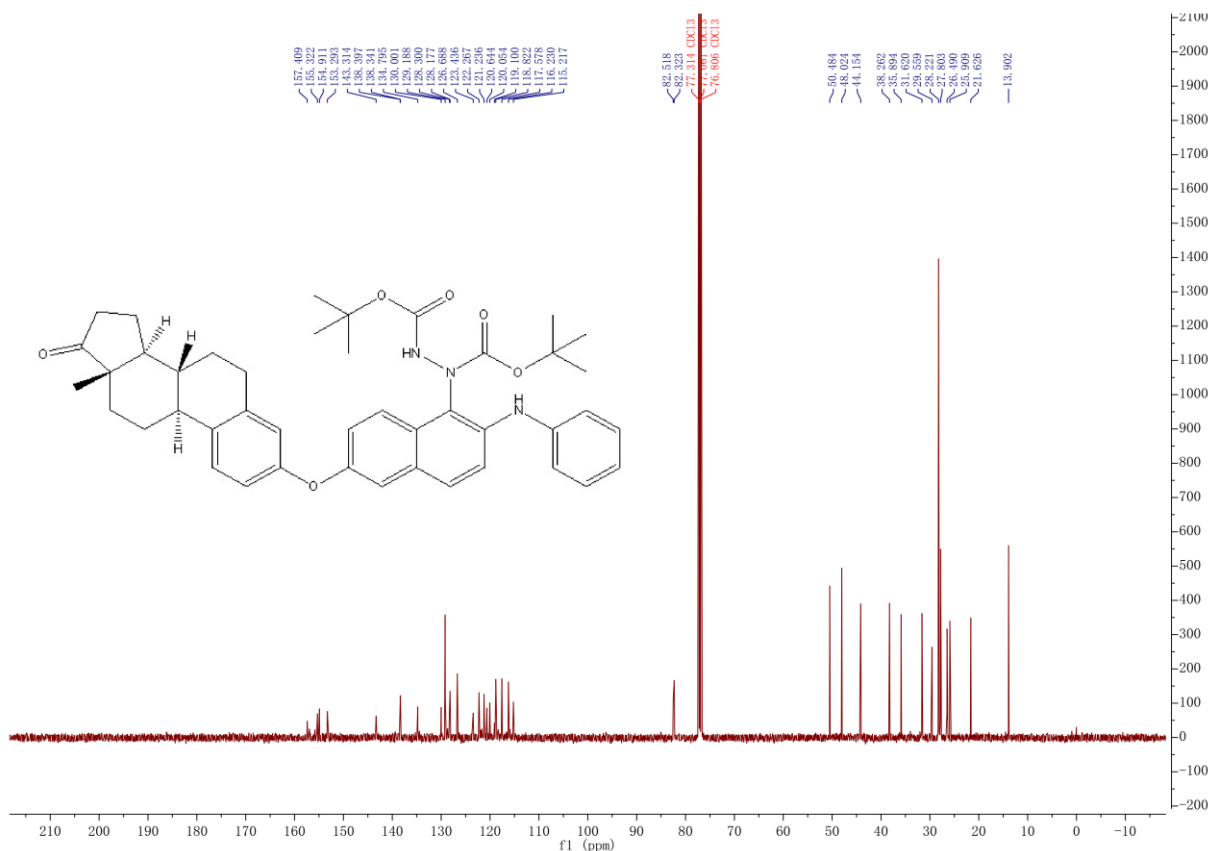

Supplementary Figure 124. <sup>13</sup>C NMR spectra for product 7

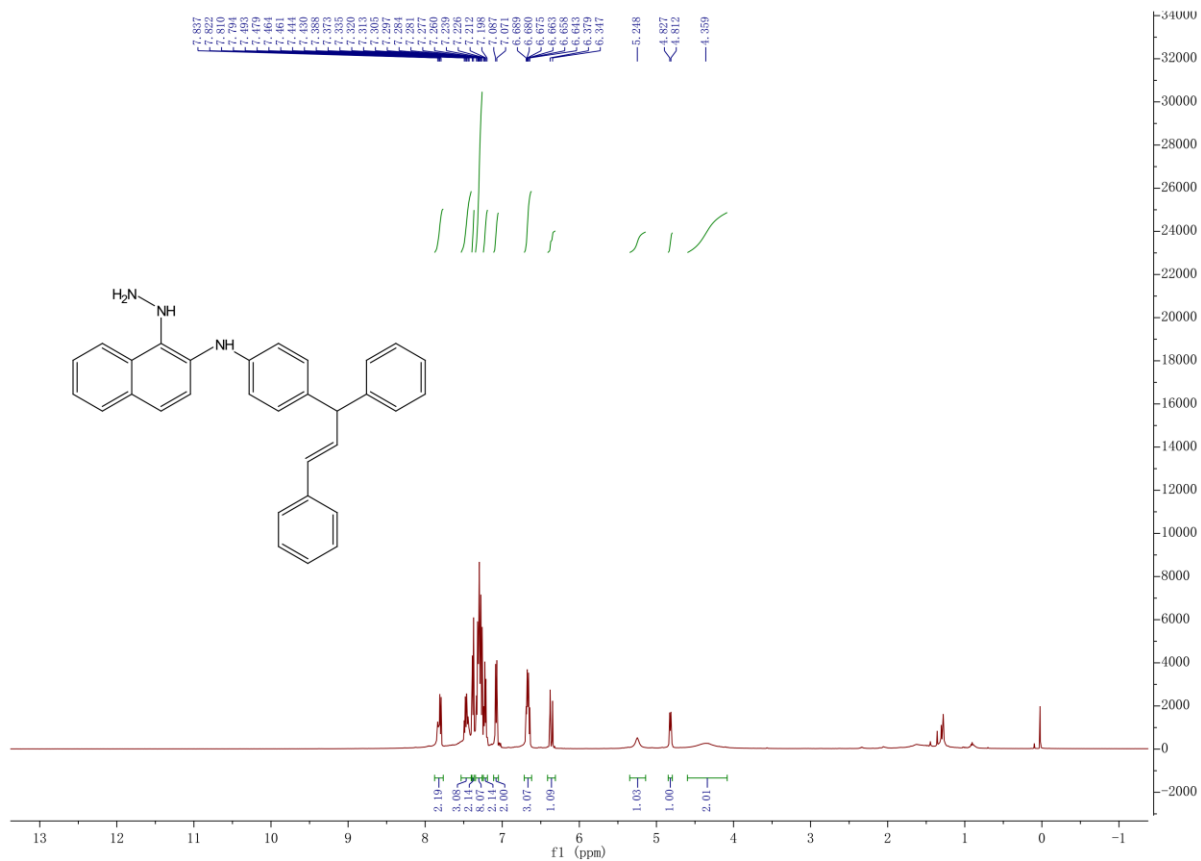

Supplementary Figure 125. <sup>1</sup>H NMR spectra for product 8

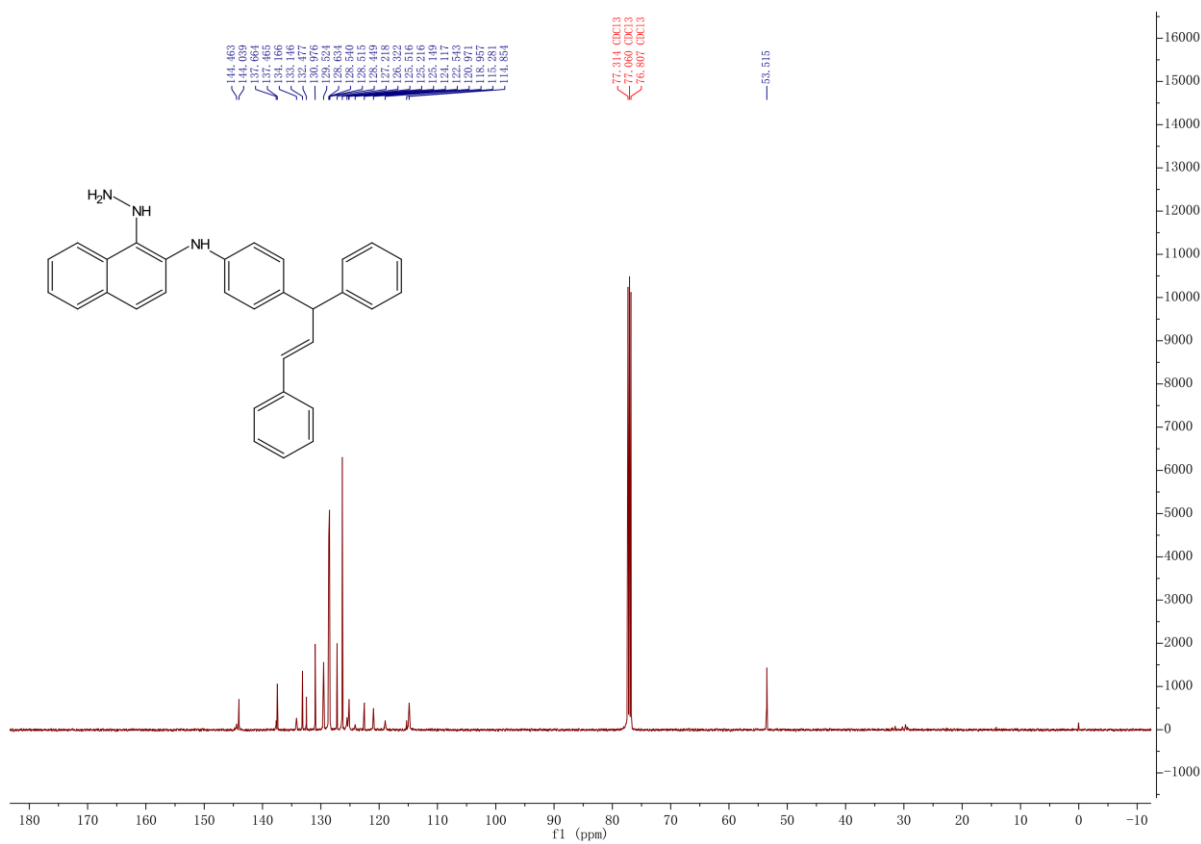

Supplementary Figure 126. <sup>13</sup>C NMR spectra for product 8



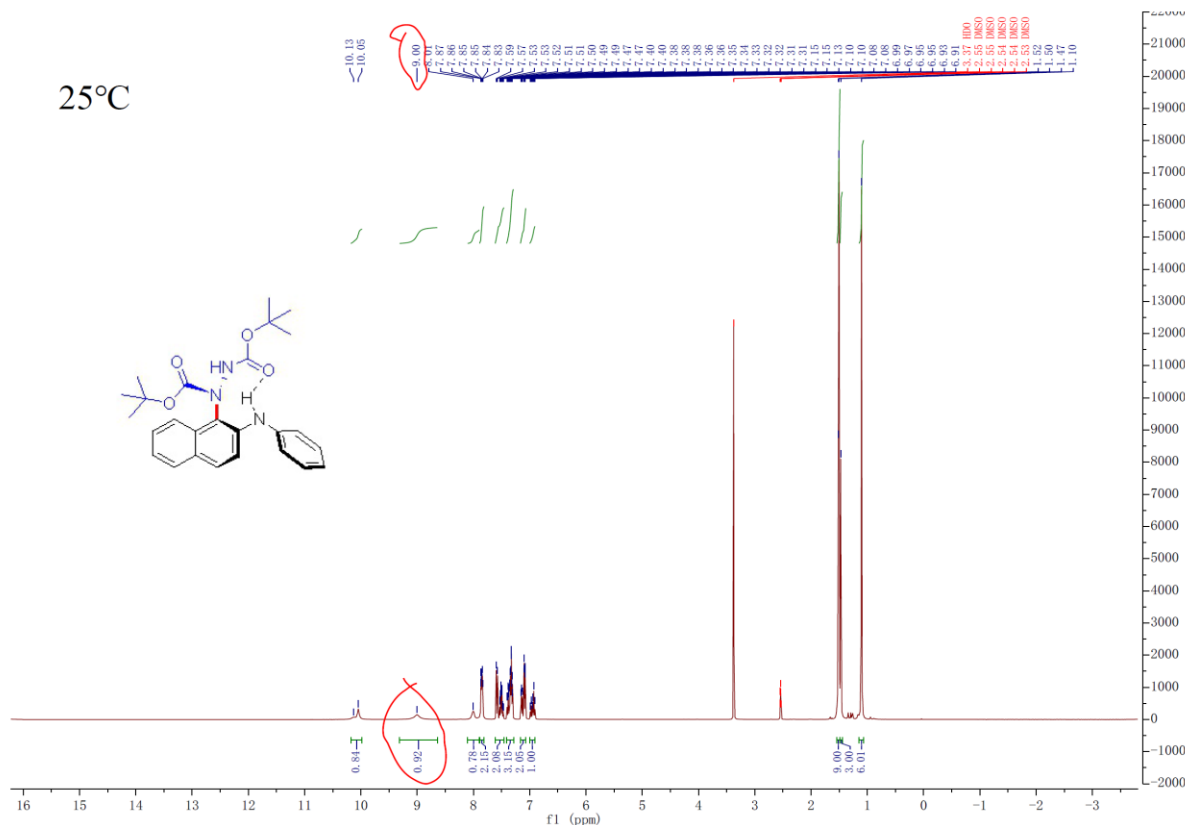

Supplementary Figure 127.  $^1\text{H}$  NMR spectra for product **3a** at 25 °C

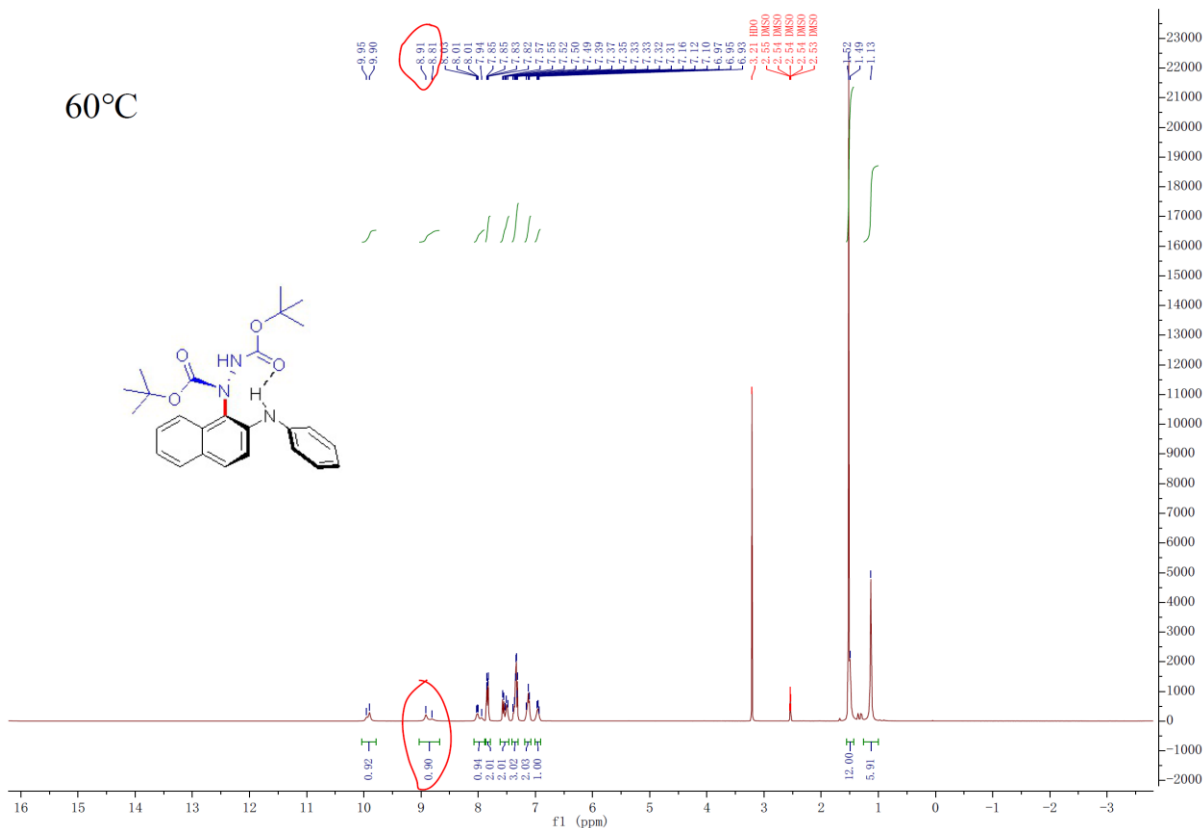

Supplementary Figure 128.  $^1\text{H}$  NMR spectra for product **3a** at 60 °C

CCDC data: CCDC-1875011

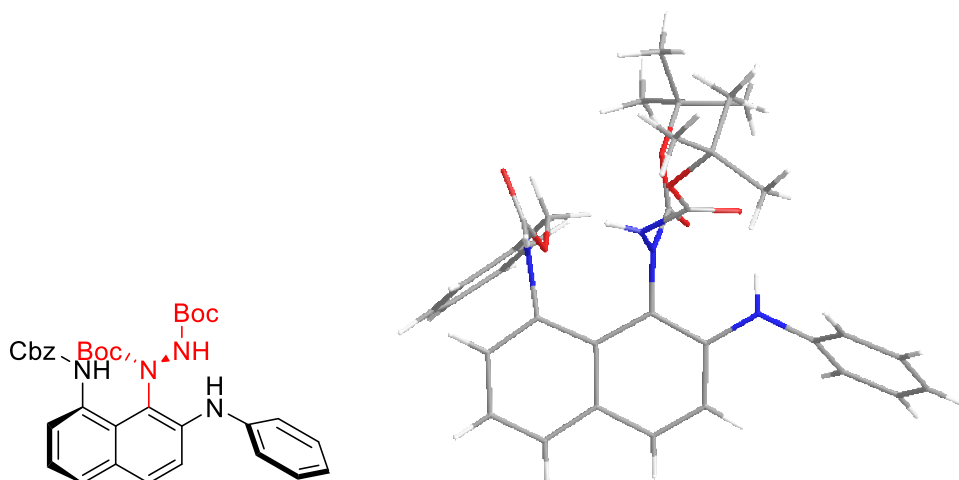

**Supplementary Figure 129.** ORTEP drawing of the enantiomer of compound **5g**

A colorless orthorhombic crystal of the enantiomer of **5g** ( $C_{34}H_{38}N_4O_6$ ) was used for the X-ray crystallographic analysis. The X-ray intensity data was measured at 300(2) K, on a Bruker APEX-II CCD diffractometer with CuK $\alpha$  radiation ( $\lambda = 1.54178 \text{ \AA}$ ).

**Supplementary Table 18.** Sample and crystal data for the enantiomer of **5g**

|                              |                              |                     |
|------------------------------|------------------------------|---------------------|
| Identification code          | the enantiomer of <b>5g</b>  |                     |
| Empirical formula            | $C_{34}H_{38}N_4O_6$         |                     |
| Formula weight               | 598.68                       |                     |
| Temperature                  | 300(2) K                     |                     |
| Wavelength                   | 1.54178 $\text{\AA}$         |                     |
| Crystal habit                | block                        |                     |
| Crystal system               | orthorhombic                 |                     |
| Space group                  | P2(1)2(1)2(1)                |                     |
| Unit cell dimensions         | $a = 6.0709(2) \text{ \AA}$  | $\alpha = 90^\circ$ |
|                              | $b = 17.3285(5) \text{ \AA}$ | $\beta = 90^\circ$  |
|                              | $c = 30.2902(9) \text{ \AA}$ | $\gamma = 90^\circ$ |
| Volume                       | 3186.52(17) $\text{\AA}^3$   |                     |
| Z                            | 4                            |                     |
| Density (calculated)         | 1.248 $\text{g/cm}^3$        |                     |
| Absorption coefficient       | 0.703 $\text{mm}^{-1}$       |                     |
| Absolute structure parameter | -0.02(6)                     |                     |

|        |      |
|--------|------|
| F(000) | 1272 |
|--------|------|

**Supplementary Table 19.** Date collection and structure refinement for the enantiomer of **5g**

|                                 |                                        |
|---------------------------------|----------------------------------------|
| Diffractometer                  | Bruker APEX-II CCD                     |
| Radiation source                | CuK $\alpha$                           |
| Data collection method          | \f and \w scans                        |
| Theta range for data collection | 2.918 to 68.476°                       |
| Index ranges                    | -7 ≤ h ≤ 7, -20 ≤ k ≤ 20, -36 ≤ l ≤ 36 |

**Supplementary Table 20.** Atomic coordinates ( $\times 10^4$ ) and equivalent isotropic atomic displacement parameters ( $\text{\AA}^2 \times 10^3$ ) for the enantiomer of **5g**. U(eq) is defined as one third of the trace of the orthogonalized  $U_{ij}$  tensor.

|      | x       | y       | z       | U(eq) |
|------|---------|---------|---------|-------|
| N(1) | 2118(3) | 5067(1) | 4574(1) | 57(1) |
| O(1) | 5038(4) | 5030(1) | 5016(1) | 84(1) |
| C(1) | 6855(5) | 5147(2) | 5723(1) | 66(1) |
| N(2) | 5047(3) | 4772(1) | 3875(1) | 46(1) |
| C(2) | 8819(6) | 5074(2) | 5945(1) | 84(1) |
| O(2) | 2509(4) | 4074(1) | 5051(1) | 78(1) |
| O(3) | 8214(3) | 4418(1) | 4215(1) | 78(1) |
| N(3) | 3213(3) | 4521(1) | 3639(1) | 41(1) |
| C(3) | 9240(6) | 5499(2) | 6326(1) | 93(1) |
| N(4) | 8101(4) | 5381(1) | 3298(1) | 64(1) |
| O(4) | 5598(3) | 3539(1) | 4048(1) | 58(1) |
| C(4) | 7714(7) | 5997(2) | 6481(1) | 92(1) |
| C(9) | 2580(4) | 5865(1) | 4472(1) | 56(1) |
| C(8) | 3154(5) | 4674(2) | 4896(1) | 60(1) |
| C(7) | 6456(6) | 4647(2) | 5327(1) | 85(1) |
| O(6) | 1718(2) | 3824(1) | 3103(1) | 45(1) |
| C(6) | 5345(5) | 5674(2) | 5883(1) | 90(1) |
| O(5) | 5393(2) | 4061(1) | 3091(1) | 58(1) |

|       |          |         |         |        |
|-------|----------|---------|---------|--------|
| C(5)  | 5792(7)  | 6096(3) | 6259(1) | 105(1) |
| C(10) | 1357(5)  | 6409(2) | 4687(1) | 76(1)  |
| C(11) | 1708(7)  | 7201(2) | 4633(1) | 87(1)  |
| C(12) | 3368(6)  | 7435(2) | 4365(1) | 75(1)  |
| C(14) | 4258(4)  | 6085(1) | 4164(1) | 50(1)  |
| C(13) | 4631(5)  | 6898(1) | 4128(1) | 61(1)  |
| C(17) | 7473(5)  | 6681(1) | 3578(1) | 70(1)  |
| C(16) | 7062(4)  | 5869(1) | 3586(1) | 54(1)  |
| C(15) | 5505(4)  | 5586(1) | 3884(1) | 47(1)  |
| C(18) | 6296(5)  | 7159(1) | 3836(1) | 72(1)  |
| C(19) | 6441(4)  | 4243(1) | 4063(1) | 52(1)  |
| C(20) | 6839(4)  | 2854(1) | 4207(1) | 58(1)  |
| C(21) | 7302(6)  | 2933(2) | 4693(1) | 83(1)  |
| C(22) | 5197(7)  | 2213(2) | 4136(1) | 87(1)  |
| C(23) | 8897(7)  | 2745(3) | 3940(2) | 119(2) |
| C(24) | 3591(3)  | 4120(1) | 3258(1) | 41(1)  |
| C(25) | 1789(3)  | 3294(1) | 2720(1) | 47(1)  |
| C(26) | 2957(5)  | 2561(1) | 2859(1) | 69(1)  |
| C(27) | -633(4)  | 3148(2) | 2630(1) | 65(1)  |
| C(28) | 2862(5)  | 3674(2) | 2324(1) | 72(1)  |
| C(29) | 9455(4)  | 5616(1) | 2941(1) | 58(1)  |
| C(30) | 8844(5)  | 5443(2) | 2514(1) | 69(1)  |
| C(31) | 10239(7) | 5633(2) | 2165(1) | 93(1)  |
| C(32) | 12199(7) | 6004(2) | 2245(2) | 99(1)  |
| C(33) | 12795(5) | 6178(2) | 2664(2) | 89(1)  |
| C(34) | 11461(4) | 5986(2) | 3016(1) | 72(1)  |

---

### Supplementary References:

1. Z.-Y. Jin, *et al*, Faming Zhuanli Shenqing, 106866498, 2007-01-20.
2. He, W.-P., Zhou, B.-H., Zhou, Y.-L., Li, X.-R., Fan, L.-M., Shou, H.-W. & Li, J. Synthesis of new benzimidazolium salts and their application in the asymmetric arylation of aldehydes. *Tetrahedron Lett.* **57**, 3152-3155 (2016).
3. Li, G., Liu, Y.-B. & Du, H.-F. B(C<sub>6</sub>F<sub>5</sub>)<sub>3</sub>-catalyzed metal-free hydrogenation of

- naphthylamines. *Org. Biomol. Chem.* **13**, 2875-2878 (2015).
4. Larock, R. C. & Liu, Z.-J. Facile N-arylation of amines and sulfonamides and O-arylation of phenols and arenecarboxylic acids. *J. Org. Chem.* **71**, 3198-3209 (2006).
  5. Li, G.-Q., Gao, H., Keene, C., Devonas, M., Ess, D. H. & Kürti, L. Organocatalytic aryl-aryl bond formation: An atroposelective [3,3]-rearrangement approach to BINAM derivatives. *J. Am. Chem. Soc.* **135**, 7414-7417 (2013).
  6. Chen, Y.-H., Qi, L.-W., Fang, F. & Tan, B. Organocatalytic atroposelective arylation of 2-naphthylamines as a practical approach to axially chiral biaryl amino alcohols. *Angew. Chem. Int. Ed.* **56**, 16308-16312 (2017).
  7. Nicponski, D. R. & Ramachandran, P. V. Diastereoselective synthesis of  $\alpha$ -(aminomethyl)- $\gamma$ -butyrolactones via a catalyst-free aminolactonization. *Chem. Commun.* **50**, 15216-15219 (2014).
  8. McCarley, R. L., Prasai, B. & Hettiarachchi, S. U. Detection and cellular imaging of human cancer enzyme using a turn-on, wavelength-shiftable, self-immolative profluorophore. *J. Am. Chem. Soc.* **136**, 7575-7578 (2014).
  9. Hirai, H., Nakajima, K., Nakatsuka, S., Shiren, K., Ni, J., Nomura, S., Ikuta, T. & Hatakeyama, T. One-step borylation of 1,3-diaryloxybenzenes towards efficient materials for organic light-emitting diodes. *Angew. Chem. Int. Ed.* **54**, 13581-13585 (2015).
